# Supplementary material for: Effects of MP Polyethylene Microparticles on Microbiome and Inflammatory Response of Larval Zebrafish
Source: Toxics. 2020 Aug 11;8(3):55. doi: 10.3390/toxics8030055 (PMC7560425; doi:10.3390/toxics8030055)
Supplement: Supplementary file 1 [file toxics-08-00055-s001.xlsx]

## Sheet: Phyla counts
Phylum (Aggregated)	Taxonomy	Combined Abundance	9C	9MP	15C	15MP	D15_C06 Abundance	D15_C02 Abundance	D15_C04 Abundance	D15_C05 Abundance	D15_C01 Abundance	D15_C03 Abundance	D15_MP01 Abundance	D15_MP02 Abundance	D15_MP03 Abundance	D15_MP04 Abundance	D15_MP05 Abundance	D15_MP06 Abundance	D9_C01 Abundance	D9_C02 Abundance	D9_C03 Abundance	D9_C04 Abundance	D9_C05 Abundance	D9_C06 Abundance	D9_MP01 Abundance	D9_MP02 Abundance	D9_MP03 Abundance	D9_MP04 Abundance	D9_MP05 Abundance	D9_MP06 Abundance
Proteobacteria	D_0__Bacteria, D_1__Proteobacteria	1297429	41577.3	58400.7	60871.5	53003.3	73718	70682	59741	62665	50903	47520	46944	65054	58445	52063	43639	51875	57936	69038	60947	60603	56620	59572	43624	47171	52646	33126	37586	35311
Bacteroidetes	D_0__Bacteria, D_1__Bacteroidetes	59827	6113.67	3322.83	312.833	1548	242	269	412	643	11	300	6213	1899	69	95	967	45	473	658	424	3395	4774	2256	8430	7317	7349	3432	5021	5133
Firmicutes	D_0__Bacteria, D_1__Firmicutes	56234	4025.17	4330.83	0.833333	0.666667	1	0	1	0	2	1	4	0	0	0	0	0	11023	4651	10598	942	1979	2881	4934	6648	4191	1888	4367	2123
Planctomycetes	D_0__Bacteria, D_1__Planctomycetes	19430	774	2064	4.66667	2.66667	0	0	0	1	0	27	0	15	0	0	0	1	3459	2253	2044	1873	2200	2913	1101	1260	943	366	483	491
Actinobacteria	D_0__Bacteria, D_1__Actinobacteria	5456	434	235	351.833	2.33333	0	0	545	559	0	1007	0	13	0	0	1	0	1	1	1	258	245	221	684	833	807	144	72	64
Cyanobacteria	D_0__Bacteria, D_1__Cyanobacteria	3756	255.333	189.5	118.5	80.3333	11	4	133	202	0	361	254	54	6	7	155	6	174	54	114	197	174	318	280	454	270	132	169	227
Verrucomicrobia	D_0__Bacteria, D_1__Verrucomicrobia	2934	0	0	489	0	0	0	914	740	0	1280	0	0	0	0	0	0	0	0	0	0	0	0	0	0	0	0	0	0

## Sheet: Genera counts
Genus (Aggregated)	Taxonomy	Combined Abundance	9C	9MP	15C	15MP	D15_C06 Abundance	D15_C02 Abundance	D15_C04 Abundance	D15_C05 Abundance	D15_C01 Abundance	D15_C03 Abundance	D15_MP01 Abundance	D15_MP02 Abundance	D15_MP03 Abundance	D15_MP04 Abundance	D15_MP05 Abundance	D15_MP06 Abundance	D9_C01 Abundance	D9_C02 Abundance	D9_C03 Abundance	D9_C04 Abundance	D9_C05 Abundance	D9_C06 Abundance	D9_MP01 Abundance	D9_MP02 Abundance	D9_MP03 Abundance	D9_MP04 Abundance	D9_MP05 Abundance	D9_MP06 Abundance
Aeromonas	D_0__Bacteria, D_1__Proteobacteria, D_2__Gammaproteobacteria, D_3__Aeromonadales, D_4__Aeromonadaceae, D_5__Aeromonas	353027	9002.33	10937.2	22107.2	17803.3	50468	29010	13535	7757	27071	4802	2466	5937	32500	39957	4619	21341	6063	12553	6861	14284	10886	8903	12136	9537	15120	6778	5238	5205
Pseudomonas	D_0__Bacteria, D_1__Proteobacteria, D_2__Gammaproteobacteria, D_3__Pseudomonadales, D_4__Pseudomonadaceae, D_5__Pseudomonas	332592	14943.5	28755.5	6984	1787.67	890	3656	12317	9336	2322	13383	2333	3753	1047	874	1779	940	33271	35805	35550	28540	26129	31006	15503	19796	22025	10629	11150	10558
Vibrio	D_0__Bacteria, D_1__Proteobacteria, D_2__Gammaproteobacteria, D_3__Vibrionales, D_4__Vibrionaceae, D_5__Vibrio	152721	2.16667	0.666667	10755	14695.8	4	3	22043	30273	0	12207	25615	36570	1	1	25987	1	0	0	0	1	2	0	1	0	9	2	1	0
Shewanella	D_0__Bacteria, D_1__Proteobacteria, D_2__Gammaproteobacteria, D_3__Alteromonadales, D_4__Shewanellaceae, D_5__Shewanella	136522	26.3333	43.8333	12285.5	10392.3	19519	33792	13	35	20121	233	29	2	23867	9869	16	28571	36	109	30	28	17	77	2	57	6	44	26	23
Clostridium sensu stricto 13	D_0__Bacteria, D_1__Firmicutes, D_2__Clostridia, D_3__Clostridiales, D_4__Clostridiaceae 1, D_5__Clostridium sensu stricto 13	56234	4025.17	4330.83	0.833333	0.666667	1	0	1	0	2	1	4	0	0	0	0	0	11023	4651	10598	942	1979	2881	4934	6648	4191	1888	4367	2123
uncultured-2	D_0__Bacteria, D_1__Proteobacteria, D_2__Gammaproteobacteria, D_3__Betaproteobacteriales, D_4__Burkholderiaceae, D_5__uncultured	45955	2181.17	2310	424.667	2553.17	339	96	555	747	66	745	6068	3068	83	139	5869	92	3705	2388	2984	1510	2042	2372	2564	3496	1838	1452	1774	1963
Ambiguous_taxa-3	D_0__Bacteria, D_1__Proteobacteria, D_2__Gammaproteobacteria, D_3__Betaproteobacteriales, D_4__Burkholderiaceae, Ambiguous_taxa	40198	1250.5	2679.33	993.667	1572.83	507	251	1346	1636	283	1939	2655	4682	161	123	1685	131	2518	1984	2205	3530	2998	4061	1298	923	1264	1189	1605	1224
Pelomonas	D_0__Bacteria, D_1__Proteobacteria, D_2__Gammaproteobacteria, D_3__Betaproteobacteriales, D_4__Burkholderiaceae, D_5__Pelomonas	38317	2016.33	3859.67	121	252.667	64	38	298	197	4	125	1110	109	15	63	179	40	2759	6333	4739	3076	3825	3245	1940	2329	1933	2033	2109	1754
Rheinheimera	D_0__Bacteria, D_1__Proteobacteria, D_2__Gammaproteobacteria, D_3__Alteromonadales, D_4__Alteromonadaceae, D_5__Rheinheimera	35358	4880.83	1148.33	36	45.8333	3	87	24	27	0	75	123	79	3	21	30	19	271	1048	647	929	2057	630	1579	2047	1421	6000	10109	8129
Arsenicibacter	D_0__Bacteria, D_1__Bacteroidetes, D_2__Bacteroidia, D_3__Cytophagales, D_4__Spirosomaceae, D_5__Arsenicibacter	31435	3993.83	1863	111.667	393.833	91	31	217	265	6	60	796	965	48	66	465	23	68	88	90	1475	1920	798	6807	6032	6224	1528	1626	1746
Variovorax	D_0__Bacteria, D_1__Proteobacteria, D_2__Gammaproteobacteria, D_3__Betaproteobacteriales, D_4__Burkholderiaceae, D_5__Variovorax	25234	694.833	634.667	1435.83	1562.33	441	90	2724	1850	183	3327	2858	4835	76	95	1426	84	449	237	141	812	450	987	1181	663	1021	720	226	358
SH-PL14	D_0__Bacteria, D_1__Planctomycetes, D_2__Planctomycetacia, D_3__Planctomycetales, D_4__Rubinisphaeraceae, D_5__SH-PL14	19430	774	2064	4.66667	2.66667	0	0	0	1	0	27	0	15	0	0	0	1	3459	2253	2044	1873	2200	2913	1101	1260	943	366	483	491
Ensifer	D_0__Bacteria, D_1__Proteobacteria, D_2__Alphaproteobacteria, D_3__Rhizobiales, D_4__Rhizobiaceae, D_5__Ensifer	16426	594.667	1605.5	295.667	11.1667	9	5	278	1165	1	316	15	35	11	1	4	1	1927	2792	3056	847	939	1456	543	559	949	444	459	614
Burkholderia-Caballeronia-Paraburkholderia	D_0__Bacteria, D_1__Proteobacteria, D_2__Gammaproteobacteria, D_3__Betaproteobacteriales, D_4__Burkholderiaceae, D_5__Burkholderia-Caballeronia-Paraburkholderia	12030	290.833	251.167	688.667	826	204	24	919	869	114	2002	1254	2955	41	72	584	50	177	106	58	232	184	440	487	288	497	179	134	160
Ambiguous_taxa-2	D_0__Bacteria, D_1__Proteobacteria, D_2__Alphaproteobacteria, D_3__Rhodobacterales, D_4__Rhodobacteraceae, Ambiguous_taxa	12009	1208.67	881.167	174.833	19.5	12	2	402	147	2	484	14	18	1	25	46	13	180	88	82	991	1003	1247	1876	2268	2209	309	330	260
Herminiimonas	D_0__Bacteria, D_1__Proteobacteria, D_2__Gammaproteobacteria, D_3__Betaproteobacteriales, D_4__Burkholderiaceae, D_5__Herminiimonas	9669	987.5	656	1.16667	0	0	7	0	0	0	0	0	0	0	0	0	0	287	1001	850	331	858	410	486	1113	646	614	1393	1673
Stenotrophomonas	D_0__Bacteria, D_1__Proteobacteria, D_2__Gammaproteobacteria, D_3__Xanthomonadales, D_4__Xanthomonadaceae, D_5__Stenotrophomonas	8577	122.833	624	586.5	39.3333	151	3039	45	106	37	141	210	13	1	0	1	11	513	878	838	827	436	593	172	176	191	69	81	48
Flectobacillus	D_0__Bacteria, D_1__Bacteroidetes, D_2__Bacteroidia, D_3__Cytophagales, D_4__Spirosomaceae, D_5__Flectobacillus	7603	944.5	323.5	1.16667	25.3333	2	2	1	2	0	0	121	5	4	4	14	4	24	46	30	496	892	289	188	221	267	1124	2034	1833
Allorhizobium-Neorhizobium-Pararhizobium-Rhizobium	D_0__Bacteria, D_1__Proteobacteria, D_2__Alphaproteobacteria, D_3__Rhizobiales, D_4__Rhizobiaceae, D_5__Allorhizobium-Neorhizobium-Pararhizobium-Rhizobium	6586	473.833	488.333	92.6667	65.6667	8	1	155	203	2	187	225	73	1	3	91	1	668	490	423	339	403	470	805	740	545	249	212	292
Fluviicola	D_0__Bacteria, D_1__Bacteroidetes, D_2__Bacteroidia, D_3__Flavobacteriales, D_4__Crocinitomicaceae, D_5__Fluviicola	6177	452.167	426.5	93.5	87.8333	148	236	4	146	5	22	385	16	14	22	76	14	65	274	96	772	817	352	248	379	147	321	696	922
Chryseobacterium	D_0__Bacteria, D_1__Bacteroidetes, D_2__Bacteroidia, D_3__Flavobacteriales, D_4__Weeksellaceae, D_5__Chryseobacterium	6107	322.833	237.167	101.333	434.5	0	0	189	201	0	218	2602	1	0	0	4	0	28	93	41	210	412	171	496	137	232	306	403	363
Leifsonia	D_0__Bacteria, D_1__Actinobacteria, D_2__Actinobacteria, D_3__Micrococcales, D_4__Microbacteriaceae, D_5__Leifsonia	5456	434	235	351.833	2.33333	0	0	545	559	0	1007	0	13	0	0	1	0	1	1	1	258	245	221	684	833	807	144	72	64
Desulfovibrio	D_0__Bacteria, D_1__Proteobacteria, D_2__Deltaproteobacteria, D_3__Desulfovibrionales, D_4__Desulfovibrionaceae, D_5__Desulfovibrio	5339	54.6667	411.333	0.166667	0	0	0	0	0	1	0	0	0	0	0	0	0	2591	379	388	654	264	734	49	178	47	9	15	30
Ralstonia	D_0__Bacteria, D_1__Proteobacteria, D_2__Gammaproteobacteria, D_3__Betaproteobacteriales, D_4__Burkholderiaceae, D_5__Ralstonia	5001	80.6667	105	522.167	142.333	63	6	595	1410	46	1013	277	419	10	22	117	9	64	34	25	199	56	152	164	77	145	59	4	35
Gemmobacter	D_0__Bacteria, D_1__Proteobacteria, D_2__Alphaproteobacteria, D_3__Rhodobacterales, D_4__Rhodobacteraceae, D_5__Gemmobacter	4620	114.833	80	573.333	0	0	0	702	1313	0	1425	0	0	0	0	0	0	145	2	19	103	110	112	134	147	215	49	93	51
Zoogloea	D_0__Bacteria, D_1__Proteobacteria, D_2__Gammaproteobacteria, D_3__Betaproteobacteriales, D_4__Rhodocyclaceae, D_5__Zoogloea	4455	418.5	359.333	0	0	0	0	0	0	0	0	0	0	0	0	0	0	115	158	196	465	783	227	327	237	316	409	479	743
HdN1	D_0__Bacteria, D_1__Proteobacteria, D_2__Gammaproteobacteria, D_3__Oceanospirillales, D_4__Halomonadaceae, D_5__HdN1	4275	196	497.333	0	0	0	0	0	0	0	0	0	0	0	0	0	0	122	520	219	698	1235	305	7	31	0	274	446	418
{Unknown Order} Gammaproteobacteria	D_0__Bacteria, D_1__Proteobacteria, D_2__Gammaproteobacteria, , ,	4224	72	71.8333	314.833	248.333	400	322	444	314	266	143	121	246	346	333	219	225	48	74	55	100	82	54	66	65	84	82	60	75
Azolla filiculoides	D_0__Bacteria, D_1__Cyanobacteria, D_2__Oxyphotobacteria, D_3__Chloroplast, D_4__Azolla filiculoides, D_5__Azolla filiculoides	3756	255.333	189.5	118.5	80.3333	11	4	133	202	0	361	254	54	6	7	155	6	174	54	114	197	174	318	280	454	270	132	169	227
Ekhidna	D_0__Bacteria, D_1__Bacteroidetes, D_2__Bacteroidia, D_3__Cytophagales, D_4__Cyclobacteriaceae, D_5__Ekhidna	3354	32.5	37.8333	2.5	485.667	0	0	1	14	0	0	2091	638	0	0	185	0	3	3	2	69	113	40	0	2	0	57	73	63
Novispirillum	D_0__Bacteria, D_1__Proteobacteria, D_2__Alphaproteobacteria, D_3__Rhodospirillales, D_4__Rhodospirillaceae, D_5__Novispirillum	3213	355.667	170.667	0	54.3333	0	0	0	0	0	0	264	0	0	0	62	0	28	333	121	66	123	82	299	309	297	255	563	411
C39	D_0__Bacteria, D_1__Proteobacteria, D_2__Gammaproteobacteria, D_3__Betaproteobacteriales, D_4__Rhodocyclaceae, D_5__C39	3118	155.167	104	280.167	0	0	0	520	447	0	714	0	0	0	0	0	0	11	34	6	207	125	123	129	217	220	144	118	103
Plesiomonas	D_0__Bacteria, D_1__Proteobacteria, D_2__Gammaproteobacteria, D_3__Enterobacteriales, D_4__Enterobacteriaceae, D_5__Plesiomonas	2979	94.3333	102	180.5	126.5	422	154	160	84	212	51	29	48	176	317	52	137	57	122	75	114	114	89	98	100	164	83	53	68
Ambiguous_taxa-4	D_0__Bacteria, D_1__Verrucomicrobia, D_2__Verrucomicrobiae, D_3__Pedosphaerales, D_4__Pedosphaeraceae, Ambiguous_taxa	2934	0	0	489	0	0	0	914	740	0	1280	0	0	0	0	0	0	0	0	0	0	0	0	0	0	0	0	0	0
Reyranella	D_0__Bacteria, D_1__Proteobacteria, D_2__Alphaproteobacteria, D_3__Reyranellales, D_4__Reyranellaceae, D_5__Reyranella	2741	132	48.3333	219.5	84.1667	9	4	365	279	0	660	83	257	6	2	156	1	14	80	15	6	6	6	177	267	291	41	3	13
Cellvibrio	D_0__Bacteria, D_1__Proteobacteria, D_2__Gammaproteobacteria, D_3__Cellvibrionales, D_4__Cellvibrionaceae, D_5__Cellvibrio	2552	86.8333	48	273	33.6667	1	0	473	591	0	573	88	85	1	0	28	0	21	144	18	0	7	1	118	133	29	53	68	120
Runella	D_0__Bacteria, D_1__Bacteroidetes, D_2__Bacteroidia, D_3__Cytophagales, D_4__Spirosomaceae, D_5__Runella	2521	118.667	210.5	2.5	101.167	0	0	0	15	0	0	176	241	0	0	190	0	177	76	135	163	214	422	253	205	155	9	56	34
Bosea	D_0__Bacteria, D_1__Proteobacteria, D_2__Alphaproteobacteria, D_3__Rhizobiales, D_4__Beijerinckiaceae, D_5__Bosea	2476	86.3333	173.167	102.333	18.5	28	3	113	333	0	137	66	15	2	6	18	4	259	169	102	285	96	322	65	116	73	90	65	109
Novosphingobium	D_0__Bacteria, D_1__Proteobacteria, D_2__Alphaproteobacteria, D_3__Sphingomonadales, D_4__Sphingomonadaceae, D_5__Novosphingobium	2242	53.5	49	122	153.167	24	6	149	218	30	305	248	547	7	8	96	13	61	18	13	75	27	76	85	62	88	45	14	27
Ellin6055	D_0__Bacteria, D_1__Proteobacteria, D_2__Alphaproteobacteria, D_3__Sphingomonadales, D_4__Sphingomonadaceae, D_5__Ellin6055	2083	53.3333	45.5	101.667	161	49	7	147	159	26	222	285	456	8	15	198	4	28	19	12	46	20	62	114	64	64	43	11	24
Ambiguous_taxa-1	D_0__Bacteria, D_1__Proteobacteria, D_2__Alphaproteobacteria, D_3__Rhizobiales, D_4__Rhizobiaceae, Ambiguous_taxa	1954	26	129.5	123.667	38.6667	3	19	41	360	65	254	40	84	14	5	63	26	91	67	53	213	189	211	44	32	13	25	9	33
Nubsella	D_0__Bacteria, D_1__Bacteroidetes, D_2__Bacteroidia, D_3__Sphingobacteriales, D_4__Sphingobacteriaceae, D_5__Nubsella	1839	136.167	181.167	0.166667	3.5	1	0	0	0	0	0	4	1	2	3	7	4	107	78	30	210	405	170	194	121	152	75	109	166
Afipia	D_0__Bacteria, D_1__Proteobacteria, D_2__Alphaproteobacteria, D_3__Rhizobiales, D_4__Xanthobacteraceae, D_5__Afipia	1785	48.3333	52	117.333	81.8333	48	9	116	293	28	210	200	207	4	5	71	4	52	21	9	89	31	98	64	67	96	30	5	28
Aquabacterium	D_0__Bacteria, D_1__Proteobacteria, D_2__Gammaproteobacteria, D_3__Betaproteobacteriales, D_4__Burkholderiaceae, D_5__Aquabacterium	1705	110	153.167	4.66667	7.5	1	3	9	11	0	4	25	5	2	2	11	0	162	217	211	109	161	112	109	146	92	106	89	118
Methyloversatilis	D_0__Bacteria, D_1__Proteobacteria, D_2__Gammaproteobacteria, D_3__Betaproteobacteriales, D_4__Rhodocyclaceae, D_5__Methyloversatilis	1631	119.667	168.833	3	1.16667	4	0	0	14	0	0	0	0	2	0	0	5	55	66	87	170	334	176	180	99	68	102	124	145
Acinetobacter	D_0__Bacteria, D_1__Proteobacteria, D_2__Gammaproteobacteria, D_3__Pseudomonadales, D_4__Moraxellaceae, D_5__Acinetobacter	1277	16.8333	91.8333	1	16.8333	2	0	0	0	2	2	0	72	3	15	5	6	534	162	155	106	63	49	16	19	37	16	3	10
Enterobacter	D_0__Bacteria, D_1__Proteobacteria, D_2__Gammaproteobacteria, D_3__Enterobacteriales, D_4__Enterobacteriaceae, D_5__Enterobacter	1211	154	56.5	3	1.66667	0	13	0	1	0	4	2	0	0	6	1	1	16	52	20	54	89	28	96	77	83	221	254	193
Pseudorhodobacter	D_0__Bacteria, D_1__Proteobacteria, D_2__Alphaproteobacteria, D_3__Rhodobacterales, D_4__Rhodobacteraceae, D_5__Pseudorhodobacter	1146	0	0	191	0	0	0	272	331	0	543	0	0	0	0	0	0	0	0	0	0	0	0	0	0	0	0	0	0
Limnobacter	D_0__Bacteria, D_1__Proteobacteria, D_2__Gammaproteobacteria, D_3__Betaproteobacteriales, D_4__Burkholderiaceae, D_5__Limnobacter	1146	8.33333	7.83333	101.333	74.6667	5	2	52	221	6	322	107	111	32	58	17	123	0	0	0	13	15	12	7	39	4	0	0	0
uncultured-3	D_0__Bacteria, D_1__Proteobacteria, D_2__Gammaproteobacteria, D_3__Vibrionales, D_4__Vibrionaceae, D_5__uncultured	1145	36.6667	21.3333	80.1667	57.3333	30	30	184	163	14	60	46	128	19	20	117	14	5	22	9	21	38	5	33	19	20	53	48	47
Dechloromonas	D_0__Bacteria, D_1__Proteobacteria, D_2__Gammaproteobacteria, D_3__Betaproteobacteriales, D_4__Rhodocyclaceae, D_5__Dechloromonas	1071	72.1667	103	0	0	0	0	0	0	0	0	0	0	0	0	0	0	98	26	58	141	144	171	78	86	57	52	81	79
{Unknown Genus} Burkholderiaceae	D_0__Bacteria, D_1__Proteobacteria, D_2__Gammaproteobacteria, D_3__Betaproteobacteriales, D_4__Burkholderiaceae,	1023	39.1667	107.5	4.33333	7.16667	0	2	9	7	0	8	12	14	0	0	16	1	124	120	177	95	101	102	50	63	36	24	36	26
Acidovorax	D_0__Bacteria, D_1__Proteobacteria, D_2__Gammaproteobacteria, D_3__Betaproteobacteriales, D_4__Burkholderiaceae, D_5__Acidovorax	1017	42.5	83.6667	10.8333	20.6667	3	1	15	13	0	33	33	46	2	0	43	0	120	92	113	83	63	102	49	43	22	39	56	46
Polynucleobacter	D_0__Bacteria, D_1__Proteobacteria, D_2__Gammaproteobacteria, D_3__Betaproteobacteriales, D_4__Burkholderiaceae, D_5__Polynucleobacter	983	162	56	0	0	0	0	0	0	0	0	0	0	0	0	0	0	1	0	0	10	0	0	326	355	291	0	0	0
Roseobacter	D_0__Bacteria, D_1__Proteobacteria, D_2__Alphaproteobacteria, D_3__Rhodobacterales, D_4__Rhodobacteraceae, D_5__Roseobacter	921	1.16667	1.16667	152.333	0	0	0	277	594	0	43	0	0	0	0	0	0	0	0	0	0	0	0	7	0	0	0	0	0
Loktanella	D_0__Bacteria, D_1__Proteobacteria, D_2__Alphaproteobacteria, D_3__Rhodobacterales, D_4__Rhodobacteraceae, D_5__Loktanella	870	0.5	0.333333	144.5	0	0	0	115	642	0	110	0	0	0	0	0	0	0	0	0	0	0	0	2	0	0	0	1	0
Devosia	D_0__Bacteria, D_1__Proteobacteria, D_2__Alphaproteobacteria, D_3__Rhizobiales, D_4__Devosiaceae, D_5__Devosia	823	42.1667	77.5	11.3333	4.5	6	0	6	2	0	54	0	3	3	6	10	5	72	85	32	157	49	80	62	24	88	45	17	17
Hydrogenophaga	D_0__Bacteria, D_1__Proteobacteria, D_2__Gammaproteobacteria, D_3__Betaproteobacteriales, D_4__Burkholderiaceae, D_5__Hydrogenophaga	816	50.5	58	1.66667	32.6667	0	0	0	1	1	8	43	129	0	0	23	1	26	58	32	43	44	104	67	104	18	25	24	65
Comamonas	D_0__Bacteria, D_1__Proteobacteria, D_2__Gammaproteobacteria, D_3__Betaproteobacteriales, D_4__Burkholderiaceae, D_5__Comamonas	808	0	0	134.667	0	0	0	123	186	0	499	0	0	0	0	0	0	0	0	0	0	0	0	0	0	0	0	0	0
Brevundimonas	D_0__Bacteria, D_1__Proteobacteria, D_2__Alphaproteobacteria, D_3__Caulobacterales, D_4__Caulobacteraceae, D_5__Brevundimonas	801	6.33333	4.66667	114.667	9	1	0	200	330	0	157	0	53	0	0	0	1	9	0	5	0	1	6	16	3	5	5	0	9
uncultured-1	D_0__Bacteria, D_1__Bacteroidetes, D_2__Bacteroidia, D_3__Cytophagales, D_4__Cyclobacteriaceae, D_5__uncultured	791	113	43.1667	0	16.1667	0	0	0	0	0	0	38	32	1	0	26	0	1	0	0	0	1	14	244	220	172	12	24	6
Azohydromonas	D_0__Bacteria, D_1__Proteobacteria, D_2__Gammaproteobacteria, D_3__Betaproteobacteriales, D_4__Burkholderiaceae, D_5__Azohydromonas	757	10.8333	87	0	0	0	0	0	0	0	0	0	0	0	0	0	0	183	152	258	4	21	74	13	0	9	36	0	7

## Sheet: OTU counts
Name	Taxonomy	Combined Abundance	9C	9MP	15C	15MP	D15_C06 Abundance	D15_C02 Abundance	D15_C04 Abundance	D15_C05 Abundance	D15_C01 Abundance	D15_C03 Abundance	D15_MP01 Abundance	D15_MP02 Abundance	D15_MP03 Abundance	D15_MP04 Abundance	D15_MP05 Abundance	D15_MP06 Abundance	D9_C01 Abundance	D9_C02 Abundance	D9_C03 Abundance	D9_C04 Abundance	D9_C05 Abundance	D9_C06 Abundance	D9_MP01 Abundance	D9_MP02 Abundance	D9_MP03 Abundance	D9_MP04 Abundance	D9_MP05 Abundance	D9_MP06 Abundance	Sequence
GBTV01025760.129.1889	D_0__Bacteria, D_1__Cyanobacteria, D_2__Oxyphotobacteria, D_3__Chloroplast, D_4__Azolla filiculoides, D_5__Azolla filiculoides, D_6__Azolla filiculoides	3756	255.333	189.5	118.5	80.3333	11	4	133	202	0	361	254	54	6	7	155	6	174	54	114	197	174	318	280	454	270	132	169	227	CTACGTGCCAGCAGCCGCGGTAATACGTAGGGTGCGAGCGTTAATCGGAATTACTGGGCGTAAAGCGTGCGCAGGCGGTTATATAAGACAGATGTGAAATCCCCGGGCTCAACCTGGGAACTGCATTTGTGACTGTATAGCTAGAGTACGGCAGAGGGGGATGGAATTCCGCGTGTAGCAGTGAAATGCGTAGATATGCGGAGGAACACCGATGGCGAAGGCAATCCCCTGGGCCTGTACTGACGCTCATGCACGAAAGCGTGGGGAGCAAACAGGATTAGATACCCTGGTAGTCCATG
LNNI01000005.225118.226745	D_0__Bacteria, D_1__Proteobacteria, D_2__Gammaproteobacteria, D_3__Pseudomonadales, D_4__Pseudomonadaceae, D_5__Pseudomonas, D_6__Stenotrophomonas rhizophila	1751	39.5	126.167	12.1667	2.33333	14	4	8	45	2	0	0	0	1	4	0	9	687	158	272	139	55	116	17	84	46	43	17	30	CTGTGCCAGCAGCCGCGGTAATACAGAGGGTGCAAGCGTTAATCGGAATTACTGGGCGTAAAGCGCGCGTAGGTGGTTTGTTAAGTTGGATGTGAAAGCCCCGGGCTCAACCTGGGAACTGCATCCAAAACTGGCAAGCTAGAGTACGGTAGAGGGTGGTGGAATTTCCTGTGTAGCGGTGAAATGCGTAGATATAGGAAGGAACACCAGTGGCGAAGGCGACCACCTGGACTGATACTGACACTGAGGTGCGAAAGCGTGGGGAGCAAACAGGATTAGATACCCTGGTAGTCCACG
KR088380.1.1569	D_0__Bacteria, D_1__Proteobacteria, D_2__Gammaproteobacteria, D_3__Aeromonadales, D_4__Aeromonadaceae, D_5__Aeromonas, D_6__Aeromonas salmonicida	252897	7899.67	9569.67	14681	10912	34029	13153	12702	7329	16490	4383	2277	5496	16104	27826	4305	9464	5185	10858	5782	12651	9589	7876	10662	8318	13527	5888	4543	4460	ACTCCGTGCCAGCAGCCGCGGTAATACGGAGGGTGCAAGCGTTAATCGGAATTACTGGGCGTAAAGCGCACGCAGGCGGTTGGATAAGTTAGATGTGAAAGCCCCGGGCTCAACCTGGGAATTGCATTTAAAACTGTCCAGCTAGAGTCTTGTAGAGGGGGGTAGAATTCCAGGTGTAGCGGTGAAATGCGTAGAGATCTGGAGGAATACCGGTGGCGAAGGCGGCCCCCTGGACAAAGACTGACGCTCAGGTGCGAAAGCGTGGGGAGCAAACAGGATTAGATACCCTGGTAGTCCACGCC
AFOQ01000002.114641.116187	D_0__Bacteria, D_1__Proteobacteria, D_2__Gammaproteobacteria, D_3__Vibrionales, D_4__Vibrionaceae, D_5__Vibrio, Ambiguous_taxa	152721	2.16667	0.666667	10755	14695.8	4	3	22043	30273	0	12207	25615	36570	1	1	25987	1	0	0	0	1	2	0	1	0	9	2	1	0	CGTGCCAGCAGCCGCGGTAATACGGAGGGTGCAAGCGTTAATCGGAATTACTGGGCGTAAAGCGCATGCAGGTGGTTTGTTAAGTCAGATGTGAAAGCCCTGGGCTCAACCTAGGAATCGCATTTGAAACTGACAAGCTAGAGTACTGTAGAGGGGGGTAGAATTTCAGGTGTAGCGGTGAAATGCGTAGAGATCTGAAGGAATACCGGTGGCGAAGGCGGCCCCCTGGACAGATACTGACACTCAGATGCGAAAGCGTGGGGAGCAAACAGGATTAGATACCCTGGTAGTCCACGCC
X93146.1.1546	D_0__Bacteria, D_1__Proteobacteria, D_2__Deltaproteobacteria, D_3__Desulfovibrionales, D_4__Desulfovibrionaceae, D_5__Desulfovibrio, Ambiguous_taxa	5339	54.6667	411.333	0.166667	0	0	0	0	0	1	0	0	0	0	0	0	0	2591	379	388	654	264	734	49	178	47	9	15	30	CGTGCCAGCAGCCGCGGTAATACGGAGGGTGCAAGCGTTAATCGGAATTACTGGGCGTAAAGCGCACGTAGGCTGTAGTGTAAGTCAGGGGTGAAATCCCACGGCTCAACCGTGGAACTGCCTTTGATACTGCACAACTTGAATCCGGGAGAGGGTGGCGGAATTCCAGGTGTAGGAGTGAAATCCGTAGATATCTGGAGGAACATCAGTGGCGAAGGCGGCCACCTGGACCGGTATTGACGCTGAGGTGCGAAAGCGTGGGGAGCAAACAGGATTAGATACCCTGGTAGTCCACG
JN868813.1.1537	D_0__Bacteria, D_1__Proteobacteria, D_2__Gammaproteobacteria, D_3__Xanthomonadales, D_4__Xanthomonadaceae, D_5__Stenotrophomonas, Ambiguous_taxa	5014	105.667	508.5	160.5	36.6667	51	638	45	106	30	93	210	0	0	0	1	9	293	571	610	807	407	509	147	141	165	65	74	42	CTTCGTGCCAGCAGCCGCGGTAATACGAAGGGTGCAAGCGTTACTCGGAATTACTGGGCGTAAAGCGTGCGTAGGTGGTCGTTTAAGTCCGTTGTGAAAGCCCTGGGCTCAACCTGGGAACTGCAGTGGATACTGGGCGACTAGAATGTGGTAGAGGGTAGCGGAATTCCTGGTGTAGCAGTGAAATGCGTAGAGATCAGGAGGAACATCCATGGCGAAGGCAGCTACCTGGACCAACATTGACACTGAGGCACGAAAGCGTGGGGAGCAAACAGGATTAGATACCCTGGTAGTCCACG
KM978287.1.1535	D_0__Bacteria, D_1__Proteobacteria, D_2__Gammaproteobacteria, D_3__Betaproteobacteriales, D_4__Burkholderiaceae, D_5__Ralstonia, D_6__uncultured beta proteobacterium	1832	48.3333	75.6667	113.833	84	29	3	112	145	34	360	151	280	4	11	53	5	33	26	15	143	47	91	132	37	61	34	3	23	CTACGTGCCAGCAGCCGCGGTAATACGTAGGGTCCAAGCGTTAATCGGAATTACTGGGCGTAAAGCGTGCGCAGGCGGTTGTGCAAGACCGATGTGAAATCCCCGGGCTTAACCTGGGAATTGCATTGGTGACTGCACGGCTAGAGTGTGTCAGAGGGGGGTAGAATTCCACGTGTAGCAGTGAAATGCGTAGAGATGTGGAGGAATACCGATGGCGAAGGCAGCCCCCTGGGATAACACTGACGCTCATGCACGAAAGCGTGGGGAGCAAACAGGATTAGATACCCTGGTAGTCCACG
D84006.1.1530	D_0__Bacteria, D_1__Proteobacteria, D_2__Gammaproteobacteria, D_3__Pseudomonadales, D_4__Pseudomonadaceae, D_5__Pseudomonas, Ambiguous_taxa	10721	719	838.667	254.167	30.8333	50	116	584	284	283	208	38	83	5	23	8	28	341	2072	780	468	558	478	676	896	1270	496	536	440	CTGTGCCAGCAGCCGCGGTAATACAGAGGGTGCAAGCGTTAATCGGAATTACTGGGCGTAAAGCGCGCGTAGGTGGTTCAGCAAGTTGGAGGTGAAATCCCCGGGCTCAACCTGGGAACTGCCTCCAAAACTACTGAGCTAGAGTACGGTAGAGGGTAGTGGAATTTCCTGTGTAGCGGTGAAATGCGTAGATATAGGAAGGAACACCAGTGGCGAAGGCGACTACCTGGACTGATACTGACACTGAGGTGCGAAAGCGTGGGGAGCAAACAGGATTAGATACCCTGGTAGTCCACGCC
AB795548.1.1519	D_0__Bacteria, D_1__Proteobacteria, D_2__Gammaproteobacteria, D_3__Betaproteobacteriales, D_4__Burkholderiaceae, D_5__Hydrogenophaga, D_6__Hydrogenophaga taeniospiralis	816	50.5	58	1.66667	32.6667	0	0	0	1	1	8	43	129	0	0	23	1	26	58	32	43	44	104	67	104	18	25	24	65	CTACGTGCCAGCAGCCGCGGTAATACGTAGGGTGCAAGCGTTAATCGGAATTACTGGGCGTAAAGCGTGCGCAGGCGGTTTTGTAAGACAGGCGTGAAATCCCCGGGCTCAACCTGGGAATTGCGCTTGTGACTGCAAGGCTGGAGTGCGGCAGAGGGGGATGGAATTCCGCGTGTAGCAGTGAAATGCGTAGATATGCGGAGGAACACCGATGGCGAAGGCAATCCCCTGGGCCTGCACTGACGCTCATGCACGAAAGCGTGGGGAGCAAACAGGATTAGATACCCTGGTAGTCCACG
AY661995.1.1531	D_0__Bacteria, D_1__Proteobacteria, D_2__Gammaproteobacteria, D_3__Xanthomonadales, D_4__Xanthomonadaceae, D_5__Stenotrophomonas, Ambiguous_taxa	2746	11.3333	90.3333	327.5	2	76	1850	0	0	4	35	0	11	0	0	0	1	178	240	180	17	23	63	19	21	15	2	6	5	CTTCGTGCCAGCAGCCGCGGTAATACGAAGGGTGCAAGCGTTACTCGGAATTACTGGGCGTAAAGCGTGCGTAGGTGGTCGTTTAAGTCCGTTGTGAAAGCCCTGGGCTCAACCTGGGAACTGCAGTGGATACTGGGCGACTAGAGTGTGGTAGAGGGTAGCGGAATTCCTGGTGTAGCAGTGAAATGCGTAGAGATCAGGAGGAACATCCATGGCGAAGGCAGCTACCTGGACCAACACTGACACTGAGGCACGAAAGCGTGGGGAGCAAACAGGATTAGATACCCTGGTAGTCCACGCC
AY212647.1.1524	D_0__Bacteria, D_1__Proteobacteria, D_2__Gammaproteobacteria, D_3__Betaproteobacteriales, D_4__Rhodocyclaceae, D_5__Zoogloea, Ambiguous_taxa	4455	418.5	359.333	0	0	0	0	0	0	0	0	0	0	0	0	0	0	115	158	196	465	783	227	327	237	316	409	479	743	CTACGTGCCAGCAGCCGCGGTAATACGTAGGGTGCGAGCGTTAATCGGAATTACTGGGCGTAAAGCGTGCGCAGGCGGTTATGTAAGACAGATGTGAAATCCCCGGGCTCAACCTGGGAACTGCGTTTGTGACTGCATAACTAGAGTACGGCAGAGGGAGGTGGAATTCCACGTGTAGCAGTGAAATGCGTAGAGATGTGGAGGAACACCGATGGCGAAGGCAGCCTCCTGGGCCAGTACTGACGCTCATGCACGAAAGCGTGGGGAGCAAACAGGATTAGATACCCTGGTAGTCCACG
AY957922.1.1530	D_0__Bacteria, D_1__Proteobacteria, D_2__Gammaproteobacteria, D_3__Betaproteobacteriales, D_4__Rhodocyclaceae, D_5__Dechloromonas, D_6__uncultured bacterium	1071	72.1667	103	0	0	0	0	0	0	0	0	0	0	0	0	0	0	98	26	58	141	144	171	78	86	57	52	81	79	CTACGTGCCAGCAGCCGCGGTAATACGTAGGGTGCGAGCGTTAATCGGAATTACTGGGCGTAAAGCGTGCGCAGGCGGTTTCGTAAGACAGAGGTGAAATCCCCGGGCTCAACCTGGGAACTGCCTTTGTGACTGCGAAGCTAGAGTACGGCAGAGGGGGGTGGAATTCCACGTGTAGCAGTGAAATGCGTAGAGATGTGGAGGAACACCGATGGCGAAGGCAGCCCCCTGGGCCGATACTGACGCTCATGCACGAAAGCGTGGGTAGCAAACAGGATTAGATACCCTGGTAGTCCACG
BBUL01000055.3960.5476	D_0__Bacteria, D_1__Proteobacteria, D_2__Gammaproteobacteria, D_3__Cellvibrionales, D_4__Cellvibrionaceae, D_5__Cellvibrio, Ambiguous_taxa	2552	86.8333	48	273	33.6667	1	0	473	591	0	573	88	85	1	0	28	0	21	144	18	0	7	1	118	133	29	53	68	120	CGTGCCAGCAGCCGCGGTAATACGGAGGGTGCAAGCGTTAATCGGAATTACTGGGCGTAAAGCGCACGTAGGTGGTTTGTTAAGCTAGCTGTGAAATCCCCGGGCTCAACCTGGGCACTGCAGTTAGAACTGGCAAGCTAGAGTAGGGTAGAGGGGTGTGGAATTCCAGGTGTAGCGGTGAAATGCGTAGATATCTGGAGGAACATCAGTGGCGAAGGCGACACCCTGGACTCATACTGACACTGAGGTGCGAAAGCGTGGGGAGCAAACAGGATTAGATACCCTGGTAGTCCACG
BDMA01000120.213.1729	D_0__Bacteria, D_1__Proteobacteria, D_2__Gammaproteobacteria, D_3__Pseudomonadales, D_4__Pseudomonadaceae, D_5__Pseudomonas, Ambiguous_taxa	66395	5160.83	4400.5	1818.83	219	358	607	4096	2056	1640	2156	366	651	31	89	62	115	1408	10912	3151	2014	2727	2991	4608	6536	10302	3020	3886	2613	CTTCGTGCCAGCAGCCGCGGTAATACGAAGGGTGCAAGCGTTAATCGGAATTACTGGGCGTAAAGCGCGCGTAGGTGGTTCAGCAAGTTGGAGGTGAAATCCCCGGGCTCAACCTGGGAACTGCCTCCAAAACTACTGAGCTAGAGTACGGTAGAGGGTAGTGGAATTTCCTGTGTAGCGGTGAAATGCGTAGATATAGGAAGGAACACCAGTGGCGAAGGCGACTACCTGGACTGATACTGACACTGAGGTGCGAAAGCGTGGGGAGCAAACAGGATTAGATACCCTGGTAGTCCACGCC
DQ234095.1.1540	D_0__Bacteria, D_1__Proteobacteria, D_2__Gammaproteobacteria, D_3__Betaproteobacteriales, D_4__Burkholderiaceae, Ambiguous_taxa, Ambiguous_taxa	22291	761.5	2209	62.1667	395.5	83	152	10	49	76	3	658	632	90	36	908	49	2241	1782	2145	2872	2707	3229	519	463	442	707	1475	963	CTACGTGCCAGCAGCCGCGGTAATACGTAGGGTGCAAGCGTTAATCGGAATTACTGGGCGTAAAGCGTGCGCAGGCGGTTTTGTAAGACAGTGGTGAAATCCCCGGGCTCAACCTGGGAACTGCCATTGTGACTGCAAGGCTAGAGTGCGGCAGAGGGGGATGGAATTCCGCGTGTAGCAGTGAAATGCGTAGATATGCGGAGGAACACCGATGGCGAAGGCAATCCCCTGGGCCTGCACTGACGCTCATGCACGAAAGCGTGGGGAGCAAACAGGATTAGATACCCTGGTAGTCCACG
FPLL01000761.10.1526	D_0__Bacteria, D_1__Proteobacteria, D_2__Gammaproteobacteria, D_3__Betaproteobacteriales, D_4__Burkholderiaceae, D_5__Variovorax, Ambiguous_taxa	23911	644.833	599.667	1368.67	1487	423	83	2604	1775	173	3154	2728	4589	72	93	1362	78	420	225	134	767	431	931	1110	617	943	656	210	333	CTACGTGCCAGCAGCCGCGGTAATACGTAGGGTGCAAGCGTTAATCGGAATTACTGGGCGTAAAGCGTGCGCAGGCGGTTATGTAAGACAGTTGTGAAATCCCCGGGCTCAACCTGGGAACTGCATCTGTGACTGCATAGCTAGAGTACGGTAGAGGGGGATGGAATTCCGCGTGTAGCAGTGAAATGCGTAGATATGCGGAGGAACACCGATGGCGAAGGCAATCCCCTGGACCTGTACTGACGCTCATGCACGAAAGCGTGGGGAGCAAACAGGATTAGATACCCTGGTAGTCCACGC
JN082574.1.1532	D_0__Bacteria, D_1__Proteobacteria, D_2__Gammaproteobacteria, D_3__Pseudomonadales, D_4__Moraxellaceae, D_5__Acinetobacter, D_6__uncultured Acinetobacter sp.	1277	16.8333	91.8333	1	16.8333	2	0	0	0	2	2	0	72	3	15	5	6	534	162	155	106	63	49	16	19	37	16	3	10	CTGTGCCAGCAGCCGCGGTAATACAGAGGGTGCGAGCGTTAATCGGATTTACTGGGCGTAAAGCGTGCGTAGGCGGCTTTTTAAGTCGGATGTGAAATCCCTGAGCTTAACTTAGGAATTGCATTCGATACTGGGAAGCTAGAGTATGGGAGAGGATGGTAGAATTCCAGGTGTAGCGGTGAAATGCGTAGAGATCTGGAGGAATACCGATGGCGAAGGCAGCCATCTGGCCTAATACTGACGCTGAGGTACGAAAGCATGGGGAGCAAACAGGATTAGATACCCTGGTAGTCCATG
FPLM01003094.15.1529	D_0__Bacteria, D_1__Proteobacteria, D_2__Gammaproteobacteria, D_3__Betaproteobacteriales, D_4__Burkholderiaceae, Ambiguous_taxa, Ambiguous_taxa	1879	49	47.3333	97	128.5	52	8	176	147	22	177	239	417	8	15	86	6	24	36	6	66	33	67	76	39	81	67	8	23	CTACGTGCCAGCAGCCGCGGTAATACGTAGGGTGCAAGCGTTAATCGGAATTACTGGGCGTAAAGCGTGCGCAGGCGGTGATGTAAGACAGATGTGAAATCCCCGGGCTCAACCTGGGAACTGCATTTGTGACTGCATCGCTGGAGTGCGGCAGAGGGGGATGGAATTCCGCGTGTAGCAGTGAAATGCGTAGATATGCGGAGGAACACCGATGGCGAAGGCAATCCCCTGGGCCTGCACTGACGCTCATGCACGAAAGCGTGGGGAGCAAACAGGATTAGATACCCTGGTAGTCCACG
AB761294.1.1530	D_0__Bacteria, D_1__Proteobacteria, D_2__Gammaproteobacteria, D_3__Betaproteobacteriales, D_4__Burkholderiaceae, Ambiguous_taxa, Ambiguous_taxa	16028	440	423	834.5	1048.83	372	91	1160	1440	185	1759	1758	3633	63	72	691	76	253	166	54	592	258	765	703	421	741	415	122	238	CGTGCCAGCAGCCGCGGTAATACGTAGGGTGCGAGCGTTAATCGGAATTACTGGGCGTAAAGCGTGCGCAGGCGGTGATGTAAGACAGATGTGAAATCCCCGGGCTCAACCTGGGAACTGCATTTGTGACTGCATCGCTGGAGTGCGGCAGAGGGGGATGGAATTCCGCGTGTAGCAGTGAAATGCGTAGATATGCGGAGGAACACCGATGGCGAAGGCAATCCCCTGGGCCTGCACTGACGCTCATGCACGAAAGCGTGGGGAGCAAACAGGATTAGATACCCTGGTAGTCCACGCC
AFHG01000027.189.1709	D_0__Bacteria, D_1__Proteobacteria, D_2__Gammaproteobacteria, D_3__Betaproteobacteriales, D_4__Rhodocyclaceae, D_5__Methyloversatilis, Ambiguous_taxa	1631	119.667	168.833	3	1.16667	4	0	0	14	0	0	0	0	2	0	0	5	55	66	87	170	334	176	180	99	68	102	124	145	CTACGTGCCAGCAGCCGCGGTAATACGTAGGGTGCGAGCGTTAATCGGAATTACTGGGCGTAAAGCGTGCGCAGGCGGTTGTGTAAGACAGGTGTGAAATCCCCGGGCTTAACCTGGGAACTGCGCTTGTGACTGCACAGCTAGAGTATGGCAGAGGGGGGTGGAATTCCACGTGTAGCAGTGAAATGCGTAGAGATGTGGAGGAACACCGATGGCGAAGGCAGCCCCCTGGGCCAATACTGACGCTCATGCACGAAAGCGTGGGGAGCAAACAGGATTAGATACCCTGGTAGTCCACG
JN869042.1.1525	D_0__Bacteria, D_1__Proteobacteria, D_2__Gammaproteobacteria, D_3__Betaproteobacteriales, D_4__Burkholderiaceae, D_5__Limnobacter, D_6__uncultured bacterium	1146	8.33333	7.83333	101.333	74.6667	5	2	52	221	6	322	107	111	32	58	17	123	0	0	0	13	15	12	7	39	4	0	0	0	CTACGTGCCAGCAGCCGCGGTAATACGTAGGGTGCAAGCGTTAATCGGAATTACTGGGCGTAAAGCGTGCGCAGGCGGTTGTGTAAGACAGGTGTGAAATCCCCGGGCTTAACCTGGGAATTGCATTTGTGACTGCACGACTAGAGTGTGTCAGAGGGGGGTGGAATTCCACGTGTAGCAGTGAAATGCGTAGATATGTGGAGGAACACCAATGGCGAAGGCAGCCCCCTGGGATAACACTGACGCTCATGCACGAAAGCGTGGGGAGCAAACAGGATTAGATACCCTGGTAGTCCACG
KC286852.1.1516	D_0__Bacteria, D_1__Proteobacteria, D_2__Gammaproteobacteria, D_3__Betaproteobacteriales, D_4__Burkholderiaceae, D_5__Variovorax, D_6__uncultured bacterium	1323	50	35	67.1667	75.3333	18	7	120	75	10	173	130	246	4	2	64	6	29	12	7	45	19	56	71	46	78	64	16	25	CTACGTGCCAGCAGCCGCGGTAATACGTAGGGTGCGAGCGTTAATCGGAATTACTGGGCGTAAAGCGTGCGCAGGCGGTTATGTAAGACAGTTGTGAAATCCCCGGGCTCAACCTGGGAACTGCATCTGTGACTGCATAGCTAGAGTACGGTAGAGGGGGATGGAATTCCGCGTGTAGCAGTGAAATGCGTAGATATGCGGAGGAACACCGATGGCGAAGGCAATCCCCTGGACCTGTACTGACGCTCATGCACGAAAGCGTGGGGAGCAAACAGGATTAGATACCCTGGTAGTCCACG
FR853538.1.1512	D_0__Bacteria, D_1__Proteobacteria, D_2__Gammaproteobacteria, D_3__Alteromonadales, D_4__Shewanellaceae, D_5__Shewanella, D_6__uncultured bacterium	56276	10.1667	16.5	5095.33	4255.17	7983	14245	5	14	8240	85	10	0	9804	3871	11	11835	14	44	9	10	7	28	1	26	2	14	9	9	CTCCGTGCCAGCAGCCGCGGTAATACGGAGGGTCCGAGCGTTAATCGGAATTACTGGGCGTAAAGCGTGCGCAGGCGGTTTGTTAAGCGAGATGTGAAAGCCCTGGGCTCAACCTAGGAATAGCATTTCGAACTGGCGAACTAGAGTCTTGTAGAGGGGGGTAGAATTCCAGGTGTAGCGGTGAAATGCGTAGAGATCTGGAGGAATACCGGTGGCGAAGGCGGCCCCCTGGACAAAGACTGACGCTCATGCACGAAAGCGTGGGGAGCAAACAGGATTAGATACCCCTGGTAGTCCCACGCCGTAA
GU179540.1.1512	D_0__Bacteria, D_1__Proteobacteria, D_2__Gammaproteobacteria, D_3__Alteromonadales, D_4__Shewanellaceae, D_5__Shewanella, D_6__uncultured Shewanella sp.	76869	14.3333	24	6903.17	5866.33	10928	18912	7	20	11409	143	19	1	13419	5532	4	16223	22	58	19	14	9	44	0	28	3	28	14	13	ACTCCGTGCCAGCAGCCGCGGTAATACGGAGGGTCCGAGCGTTAATCGGAATTACTGGGCGTAAAGCGTGCGCAGGCGGTTTGTTAAGCGAGATGTGAAAGCCCTGGGCTCAACCTAGGAATAGCATTTCGAACTGGCGAACTAGAGTCTTGTAGAGGGGGGTAGAATTCCAGGTGTAGCGGTGAAATGCGTAGAGATCTGGAGGAATACCGGTGGCGAAGGCGGCCCCCTGGACAAAGACTGACGCTCATGCACGAAAGCGTGGGGAGCAAACAGGATTAGATACCCTGGTAGTCCACGCC
AF078772.1.1519	D_0__Bacteria, D_1__Proteobacteria, D_2__Gammaproteobacteria, D_3__Betaproteobacteriales, D_4__Burkholderiaceae, D_5__Comamonas, Ambiguous_taxa	808	0	0	134.667	0	0	0	123	186	0	499	0	0	0	0	0	0	0	0	0	0	0	0	0	0	0	0	0	0	CGTGCCAGCAGCCGCGGTAATACGTAGGGTGCAAGCGTTAATCGGAATTACTGGGCGTAAAGCGTGCGCAGGCGGTCTTGTAAGACAGAGGTGAAATCCCCGGGCTCAACCTGGGAACTGCCTTTGTGACTGCAAGGCTGGAGTGCGGCAGAGGGGGATGGAATTCCGCGTGTAGCAGTGAAATGCGTAGATATGCGGAGGAACACCGATGGCGAAGGCAATCCCCTGGGCCTGCACTGACGCTCATGCACGAAAGCGTGGGGAGCAAACAGGATTAGATACCCTGGTAGTCCACG
FR853603.1.1511	D_0__Bacteria, D_1__Proteobacteria, D_2__Gammaproteobacteria, D_3__Alteromonadales, D_4__Shewanellaceae, D_5__Shewanella, D_6__uncultured bacterium	2049	1.33333	2.5	175.333	162.5	395	357	1	1	293	5	0	1	376	295	1	302	0	4	1	4	1	4	1	2	1	2	1	1	CTCCGTGCCAGCAGCCGCGGTAATACGGAGGGTGCAAGCGTTAATCGGAATTACTGGGCGTAAAGCGCACGCAGGCGGTTGGATAAGTTAGATGTGAAAGCCCCGGGCTCAACCTGGGAATTGCATTTAAAACTGTCCAGCTAGAGTCTTGTAGAGGGGGGTAGAATTCCAGGTGTAGCGGTGAAATGCGTAGAGATCTGGAGGAATACCGGTGGCGAATGCGGCCCCCTGGACAAAGACTGACGCTCATGCACGAAAAGCGTGGGGAGCAAACAGGATTAGATACCCTGGTAGTCCACG
JMIK01000028.3582.5092	D_0__Bacteria, D_1__Proteobacteria, D_2__Gammaproteobacteria, D_3__Betaproteobacteriales, D_4__Burkholderiaceae, D_5__Burkholderia-Caballeronia-Paraburkholderia, D_6__Burkholderia sp. K24	770	16.5	16.3333	47.6667	51.3333	34	2	91	65	17	77	54	185	8	12	47	2	5	4	4	28	6	30	26	12	23	17	3	18	CTGTGCCAGCAGCCGCGGTAATACAGAGGGTGCAAGCGTTAATCGGAATTACTGGGCGTAAAGCGTGCGCAGGCGGTCCGCTAAGACAGATGTGAAATCCCCGGGCTTAACCTGGGAACTGCATTTGTGACTGGCGGGCTAGAGTATGGCAGAGGGGGGTAGAATTCCACGTGTAGCAGTGAAATGCGTAGAGATGTGGAGGAATACCGATGGCGAAGGCAGCCCCCTGGGCCAATACTGACGCTCATGCACGAAAGCGTGGGGAGCAAACAGGATTAGATACCCTGGTAGTCCACG
JN868901.1.1523	D_0__Bacteria, D_1__Proteobacteria, D_2__Gammaproteobacteria, D_3__Betaproteobacteriales, D_4__Burkholderiaceae, D_5__Polynucleobacter, D_6__uncultured bacterium	983	162	56	0	0	0	0	0	0	0	0	0	0	0	0	0	0	1	0	0	10	0	0	326	355	291	0	0	0	CTACGTGCCAGCAGCCGCGGTAATACGTAGGGTGCGAGCGTTAATCGGAATTACTGGGCGTAAAGCGTGCGCAGGCGGTTATACAAGACAGGCGTGAAATCCCCGGGCTTAACCTGGGAATGGCGCCTGTGACTGTATAGCTAGAGTGTGTCAGAGGGGGGTAGAATTCCACGTGTAGCAGTGAAATGCGTAGATATGTGGAGGAATACCAATGGCGAAGGCAGCCCCCTGGGATAACACTGACGCTCATGCACGAAAGCGTGGGGAGCAAACAGGATTAGATACCCTGGTAGTCCACG
JF830174.1.1513	D_0__Bacteria, D_1__Proteobacteria, D_2__Gammaproteobacteria, D_3__Enterobacteriales, D_4__Enterobacteriaceae, D_5__Plesiomonas, D_6__uncultured bacterium	2979	94.3333	102	180.5	126.5	422	154	160	84	212	51	29	48	176	317	52	137	57	122	75	114	114	89	98	100	164	83	53	68	ACTCCGTGCCAGCAGCCGCGGTAATACGGAGGGTGCAAGCGTTAATCGGAATTACTGGGCGTAAAGCGCACGCAGGCGGTTGGATAAGTTAGATGTGAAAGCCCCGGGCTCAACCTGGGAATTGCATTTAAAACTGTCCAGCTAGAGTCTTGTAGAGGGGGGTAGAATTCCAGGTGTAGCGGTGAAATGCGTAGAGATCTGGAGGAATACCGGTGGCGAAGGCGGCCCCCTGGACAAAGACTGACGCTCAGGTGCGAAAGCGTGGGGAGCAAACAGGATTAGATACCCTGGTAGTCACGCTG
AB021394.1.1514	D_0__Bacteria, D_1__Proteobacteria, D_2__Gammaproteobacteria, D_3__Betaproteobacteriales, D_4__Burkholderiaceae, D_5__Burkholderia-Caballeronia-Paraburkholderia, Ambiguous_taxa	11260	274.333	234.833	641	774.667	170	22	828	804	97	1925	1200	2770	33	60	537	48	172	102	54	204	178	410	461	276	474	162	131	142	CTACGTGCCAGCAGCCGCGGTAATACGTAGGGTGCAAGCGTTAATCGGAATTACTGGGCGTAAAGCGTGCGCAGGCGGTCCGCTAAGACAGATGTGAAATCCCCGGGCTTAACCTGGGAACTGCATTTGTGACTGGCGGGCTAGAGTATGGCAGAGGGGGGTAGAATTCCACGTGTAGCAGTGAAATGCGTAGAGATGTGGAGGAATACCGATGGCGAAGGCAGCCCCCTGGGCCAATACTGACGCTCATGCACGAAAGCGTGGGGAGCAAACAGGATTAGATACCCTGGTAGTCCACGCC
JF830173.1.1510	D_0__Bacteria, D_1__Proteobacteria, D_2__Gammaproteobacteria, D_3__Aeromonadales, D_4__Aeromonadaceae, D_5__Aeromonas, D_6__uncultured bacterium	5181	322	443.5	44.8333	44.6667	46	34	95	51	19	24	15	32	86	77	21	37	376	524	420	588	473	331	325	269	315	375	311	337	CTGTGCCAGCAGCCGCGGTAATACAGAGGGTGCAAGCGTTAATCGGAATTACTGGGCGTAAAGCGCACGCAGGCGGTTGGATAAGTTAGATGTGAAAGCCCCGGGCTCAACCTGGGAATTGCATTTAAAACTGTCCAGCTAGAGTCTTGTAGAGGGGGGTAGAATTCCAGGTGTAGCGGTGAAATGCGTAGAGATCTGGAGGAATACCGGTGGCGAAGGCGGCCCCCTGGACAAAGACTGACGCTCAGGTGCGAAAGCGTGGGGAGCAAACAGGATTAGATACCCTGGTAGTGCACGC
CP013656.823416.824944	D_0__Bacteria, D_1__Proteobacteria, D_2__Gammaproteobacteria, D_3__Alteromonadales, D_4__Alteromonadaceae, D_5__Rheinheimera, Ambiguous_taxa	33184	4586.17	1082.5	35.5	24	3	84	24	27	0	75	64	32	3	18	9	18	264	960	622	913	1955	596	1449	1835	1273	5591	9618	7751	CTCTGTGCCAGCAGCCGCGGTAATACAGAGGGTGCAAGCGTTAATCGGAATTACTGGGCGTAAAGCGCACGTAGGCGGTTTTTTAAGTCAGATGTGAAAGCCCCGGGCTCAACCTGGGAATTGCATTTGAAACTGGAAAACTAGAGTGTGTGAGAGGGGGGTAGAATTCCAAGTGTAGCGGTGAAATGCGTAGAGATTTGGAGGAATACCAGTGGCGAAGGCGGCCCCCTGGCACAACACTGACGCTCAGGTGCGAAAGCGTGGGGAGCAAACAGGATTAGATACCCTGGTAGTCCACGC
DQ264617.1.1515	D_0__Bacteria, D_1__Proteobacteria, D_2__Gammaproteobacteria, D_3__Betaproteobacteriales, D_4__Burkholderiaceae, D_5__uncultured, D_6__uncultured bacterium	3744	191.333	280.833	39.3333	69.1667	14	2	63	77	6	74	123	168	1	2	118	3	486	407	449	158	220	225	226	350	143	140	156	133	CTACGTGCCAGCAGCCGCGGTAATACGTAGGGTGCAAGCGTTAATCGGAATTACTGGGCGTAAAGCGTGCGCAGGCGGTTATGTAAGACAGATGTGAAATCCCCGGGCTCAACCTGGGAACTGCATTTGTGACTGCATAGCTAGAGTACGGCAGAGGGGGATGGAATTCCGCGTGTAGCAGTGAAATGCGTAGATATGCGGAGGAACACCGATGGCGAAGGCAATCCCCTGGGCCTGTACTGACGCTCATGCACGAAAGCGTGGGGAGCAAACAGGATTAGATACCCTGGTAGTCCACG
CP002542.2752771.2754283	D_0__Bacteria, D_1__Bacteroidetes, D_2__Bacteroidia, D_3__Flavobacteriales, D_4__Crocinitomicaceae, D_5__Fluviicola, Ambiguous_taxa	6177	452.167	426.5	93.5	87.8333	148	236	4	146	5	22	385	16	14	22	76	14	65	274	96	772	817	352	248	379	147	321	696	922	CGTGCCAGCAGCCGCGGTAATACGGAGGGTGCAAGCGTTATCCGGAATCATTGGGTTTAAAGGGTCCGCAGGCGGTCTTATAAGTCAGTGGTGAAATCCTACAGCTCAACTGTAGAACTGCCATTGATACTGTAAGACTTGAATTCGATCGAAGTGGGCGGAATATGACATGTAGCGGTGAAATGCTTAGATATGTCATAGAACACCGATAGCGAAGGCAGCTCACTAGGTCTGGATTGACGCTCAGGGACGAAAGCGTGGGGAGCAAACAGGATTAGATACCCTGGTAGTCCACGC
KT851870.1.1505	D_0__Bacteria, D_1__Proteobacteria, D_2__Gammaproteobacteria, D_3__Vibrionales, D_4__Vibrionaceae, D_5__uncultured, D_6__uncultured bacterium	1145	36.6667	21.3333	80.1667	57.3333	30	30	184	163	14	60	46	128	19	20	117	14	5	22	9	21	38	5	33	19	20	53	48	47	CGTGCCAGCAGCCGCGGTAATACGGAGGGTGCGAGCGTTAATCGGAATTACTGGGCGTAAAGCGCATGCAGGTGGTTTGTTAAGTCAGATGTGAAAGCCCCGGGCTCAACCTGGGAATTGCATTTAAAACTGTCCAGCTAGAGTCTTGTAGAGGGGGGTAGAATTCCAGGTGTAGCGGTGAAATGCGTAGAGATCTGGAGGAATACCGGTGGCGAAGGCGGCCCCCTGGACAAAGACTGACGCTCAGGTGCGAAAGCGTGGGGAGCAAACAGGATTAGATACCCTGGTAGTCCACG
JF808900.1.1502	D_0__Bacteria, D_1__Proteobacteria, D_2__Gammaproteobacteria, D_3__Aeromonadales, D_4__Aeromonadaceae, D_5__Aeromonas, D_6__uncultured Tolumonas sp.	4362	137.167	135	252.667	217.667	523	434	98	57	344	60	25	61	444	367	41	368	88	129	98	144	144	114	181	157	215	101	79	90	CTACGTGCCAGCAGCCGCGGTAATACGTAGGGTGCGAGCGTTAATCGGAATTACTGGGCGTAAAGCGCACGCAGGCGGTTGGATAAGTTAGATGTGAAAGCCCCGGGCTCAACCTGGGAATTGCATTTAAAACTGTCCAGCTAGAGTCTTGTAGAGGGGGGTAGAATTCCAGGTGTAGCGGTGAAATGCGTAGAGATCTGGAGGAATACCGGTGGCGAAGGCGGCCCCCTGGACAAAGACTGACGCTCAGGTGCGAAAGCGTGGGGAGCAAACAGGATTAGATACCCTGGTAGTCCACGCC
KF851140.1.1502	D_0__Bacteria, D_1__Proteobacteria, D_2__Gammaproteobacteria, D_3__Pseudomonadales, D_4__Pseudomonadaceae, D_5__Pseudomonas, D_6__uncultured Pseudomonas sp.	15615	1311.17	828.333	401.833	86	54	2287	4	0	66	0	130	0	163	64	34	125	683	1770	744	378	729	517	832	1146	880	1621	1573	1815	CTTCGTGCCAGCAGCCGCGGTAATACGAAGGGTGCAAGCGTTAATCGGAATTACTGGGCGTAAAGCGCGCGTAGGTGGTTCAGTAAGTTGGAAGTGAAATCCCCGGGCTCAACCTGGGAACTGCTTTCAAAACTGCTGAGCTAGAGTACGGTAGAGGGTGGTGGAATTTCCTGTGTAGCGGTGAAATGCGTAGATATAGGAAGGAACACCAGTGGCGAAGGCGACCACCTGGACTGATACTGACACTGAGGTGCGAAAGCGTGGGGAGCAAACAGGATTAGATACCCTGGTAGTCCACGCC
KC172281.1.1502	D_0__Bacteria, D_1__Proteobacteria, D_2__Gammaproteobacteria, D_3__Betaproteobacteriales, D_4__Burkholderiaceae, D_5__Ralstonia, Ambiguous_taxa	3169	32.3333	29.3333	408.333	58.3333	34	3	483	1265	12	653	126	139	6	11	64	4	31	8	10	56	9	61	32	40	84	25	1	12	CTACGTGCCAGCAGCCGCGGTAATACGTAGGGTCCAAGCGTTAATCGGAATTACTGGGCGTAAAGCGTGCGCAGGCGGTTGTGCAAGACCGATGTGAAATCCCCGAGCTTAACTTGGGAATTGCATTGGTGACTGCACGGCTAGAGTGTGTCAGAGGGGGGTAGAATTCCACGTGTAGCAGTGAAATGCGTAGAGATGTGGAGGAATACCGATGGCGAAGGCAGCCCCCTGGGATAACACTGACGCTCATGCACGAAAGCGTGGGGAGCAAACAGGATTAGATACCCTGGTAGTCCACG
HM773515.1.1498	D_0__Bacteria, D_1__Proteobacteria, D_2__Gammaproteobacteria, D_3__Betaproteobacteriales, D_4__Burkholderiaceae, D_5__uncultured, Ambiguous_taxa	20786	1121.83	1429.83	286	415.333	150	32	411	552	35	536	650	1205	18	29	572	18	2712	1529	2040	949	1151	1466	1444	1936	944	742	836	829	CTACGTGCCAGCAGCCGCGGTAATACGTAGGGTGCGAGCGTTAATCGGAATTACTGGGCGTAAAGCGTGCGCAGGCGGTTATGTAAGACAGATGTGAAATCCCCGGGCTCAACCTGGGAACTGCATTTGTGACTGCATAGCTAGAGTACGGCAGAGGGGGATGGAATTCCGCGTGTAGCAGTGAAATGCGTAGATATGCGGAGGAACACCGATGGCGAAGGCAATCCCCTGGGCCTGTACTGACGCTCATGCACGAAAGCGTGGGGAGCAAACAGGATTAGATACCCTGGTAGTCCACGCC
AM110970.1.1497	D_0__Bacteria, D_1__Proteobacteria, D_2__Gammaproteobacteria, D_3__Betaproteobacteriales, D_4__Burkholderiaceae, D_5__Azohydromonas, Ambiguous_taxa	757	10.8333	87	0	0	0	0	0	0	0	0	0	0	0	0	0	0	183	152	258	4	21	74	13	0	9	36	0	7	CTACGTGCCAGCAGCCGCGGTAATACGTAGGGTGCAAGCGTTAATCGGAATTACTGGGCGTAAAGCGTGCGCAGGCGGTCGTGCAAGACAGATGTGAAATCCCCGGGCTCAACCTGGGAACTGCATTTGTGACTGCACGGCTGGAGTGCGGCAGAGGGGGATGGAATTCCGCGTGTAGCAGTGAAATGCGTAGATATGCGGAGGAACACCGATGGCGAAGGCAATCCCCTGGGCCTGCACTGACGCTCATGCACGAAAGCGTGGGGAGCAAACAGGATTAGATACCCTGGTAGTCCACG
HE575561.1.1501	D_0__Bacteria, D_1__Proteobacteria, D_2__Gammaproteobacteria, D_3__Pseudomonadales, D_4__Pseudomonadaceae, D_5__Pseudomonas, Ambiguous_taxa	207867	6982.83	21598.3	1457.5	1104	219	234	3222	2919	245	1906	1507	1947	827	373	1423	547	29245	19866	29974	24544	21036	25936	8234	9910	8321	5181	4906	5345	ACTCTGTGCCAGCAGCCGCGGTAATACAGAGGGTGCAAGCGTTAATCGGAATTACTGGGCGTAAAGCGCGCGTAGGTGGTTCGTTAAGTTGGATGTGAAAGCCCCGGGCTCAACCTGGGAACTGCATCCAAAACTGGCGAGCTAGAGTATGGTAGAGGGTGGTGGAATTTCCTGTGTAGCGGTGAAATGCGTAGATATAGGAAGGAACACCAGTGGCGAAGGCGACCACCTGGACTGATACTGACACTGAGGTGCGAAAGCGTGGGGAGCAAACAGGATTAGATACCCTGGTAGTCCACGCC
KC835922.1.1493	D_0__Bacteria, D_1__Proteobacteria, D_2__Gammaproteobacteria, D_3__Betaproteobacteriales, D_4__Burkholderiaceae, D_5__uncultured, Ambiguous_taxa	11802	77	71.1667	59.1667	1767	172	43	65	8	25	42	5050	1375	64	108	3934	71	64	81	89	48	53	48	108	85	56	41	101	71	CTACGTGCCAGCAGCCGCGGTAATACGTAGGGTGCAAGCGTTAATCGGAATTACTGGGCGTAAAGCGTGCGCAGGCGGTTATGTAAGACAGAGGTGAAATCCCCGGGCTCAACCTGGGAACTGCCTTTGTGACTGCATAGCTAGAGTACGGCAGAGGGGGATGGAATTCCGCGTGTAGCAGTGAAATGCGTAGATATGCGGAGGAACACCGATGGCGAAGGCAATCCCCTGGGCCTGTACTGACGCTCATGCACGAAAGCGTGGGGAGCAAACAGGATTAGATACCCTGGTAGTCCACGC
AMQH01000037.83.1573	D_0__Bacteria, D_1__Firmicutes, D_2__Clostridia, D_3__Clostridiales, D_4__Clostridiaceae 1, D_5__Clostridium sensu stricto 13, Ambiguous_taxa	56234	4025.17	4330.83	0.833333	0.666667	1	0	1	0	2	1	4	0	0	0	0	0	11023	4651	10598	942	1979	2881	4934	6648	4191	1888	4367	2123	CGTGCCAGCAGCCGCGGTAATACGTAGGTGGCAAGCGTTGTCCGGATTTACTGGGCGTAAAGGATGCGTAGGCGGATATTTAAGTCAGATGTGAAATACCCGGGCTCAACTTGGGTGCTGCATTTGAAACTGGATATCTAGAGTGCGGGAGAGGTAAGTGGAATTCCTAGTGTAGCGGTGAAATGCGTAGAGATTAGGAAGAACACCAGTGGCGAAGGCGACTTACTGGACCGTAACTGACGCTGAGGCATGAAAGCGTGGGGAGCAAACAGGATTAGATACCCTGGTAGTCCACGCC
HQ674824.1.1494	D_0__Bacteria, D_1__Proteobacteria, D_2__Gammaproteobacteria, D_3__Betaproteobacteriales, D_4__Burkholderiaceae, D_5__Pelomonas, Ambiguous_taxa	38317	2016.33	3859.67	121	252.667	64	38	298	197	4	125	1110	109	15	63	179	40	2759	6333	4739	3076	3825	3245	1940	2329	1933	2033	2109	1754	CTACGTGCCAGCAGCCGCGGTAATACGTAGGGTGCAAGCGTTAATCGGAATTACTGGGCGTAAAGCGTGCGCAGGCGGTTATGCAAGACAGAGGTGAAATCCCCGGGCTCAACCTGGGAACTGCCTTTGTGACTGCATAGCTAGAGTACGGTAGAGGGGGATGGAATTCCGCGTGTAGCAGTGAAATGCGTAGATATGCGGAGGAACACCGATGGCGAAGGCAATCCCCTGGACCTGTACTGACGCTCATGCACGAAAGCGTGGGGAGCAAACAGGATTAGATACCCTGGTAGTCCACGCC
JN868968.1.1503	D_0__Bacteria, D_1__Proteobacteria, D_2__Alphaproteobacteria, D_3__Rhizobiales, D_4__Rhizobiaceae, D_5__Allorhizobium-Neorhizobium-Pararhizobium-Rhizobium, D_6__uncultured bacterium	6586	473.833	488.333	92.6667	65.6667	8	1	155	203	2	187	225	73	1	3	91	1	668	490	423	339	403	470	805	740	545	249	212	292	CTTCGTGCCAGCAGCCGCGGTAATACGAAGGGGGCTAGCGTTGTTCGGAATTACTGGGCGTAAAGCGCACGTAGGCGGATATTTAAGTCAGGGGTGAAATCCCGGGGCTCAACCCCGGAACTGCCTTTGATACTGGGTATCTAGAGTATGGAAGAGGTGAGTGGAATTCCGAGTGTAGAGGTGAAATTCGTAGATATTCGGAGGAACACCAGTGGCGAAGGCGGCTCACTGGTCCATTACTGACGCTGAGGTGCGAAAGCGTGGGGAGCAAACAGGATTAGATACCCTGGTAGTCCACGC
HM779393.1.1490	D_0__Bacteria, D_1__Proteobacteria, D_2__Gammaproteobacteria, D_3__Aeromonadales, D_4__Aeromonadaceae, D_5__Aeromonas, D_6__uncultured bacterium	8568	24.6667	64	683	650.667	1522	1512	25	11	1014	14	2	3	1561	1116	4	1218	59	76	48	107	79	49	25	22	42	13	24	22	CTCCGTGCCAGCAGCCGCGGTAATACGGAGGGTGCGAGCGTTAATCGGAATTACTGGGCGTAAAGCGCACGCAGGCGGTTGGATAAGTTAGATGTGAAAGCCCCGGGCTCAACCTGGGAATTGCATTTAAAACTGTCCAGCTAGAGTCTTGTAGAGGGGGGTAGAATTCCAGGTGTAGCGGTGAAATGCGTAGAGATCTGGAGGAATACCGGTGGCGAAGGCGGCCCCCTGGACAAAGACTGACGCTCAGGTGCGAAAGCGTGGGGAGCAAACAGGATTAGATACCCTGGTAGTCCACGCC
FN547417.1.1487	D_0__Bacteria, D_1__Bacteroidetes, D_2__Bacteroidia, D_3__Cytophagales, D_4__Spirosomaceae, D_5__Flectobacillus, Ambiguous_taxa	7603	944.5	323.5	1.16667	25.3333	2	2	1	2	0	0	121	5	4	4	14	4	24	46	30	496	892	289	188	221	267	1124	2034	1833	CGTGCCAGCAGCCGCGGTAATACGGAGGGTGCGAGCGTTGTCCGGATTTATTGGGTTTAAAGGGTGCGTAGGCGGTTTATTAAGTCAGTGGTGAAAGACGGTCGCTCAACGATTGCAGTGCCATTGATACTGGTAGACTTGAGTTCGTATGAGGTAGCTGGAATGGATAGTGTAGCGGTGAAATGCATAGATATTATCCAGAACTCCAATTGCGTAGGCAGGTTACTAATACGATACTGACGCTGATGCACGAAAGTGTGGGGATCAAACAGGATTAGATACCCTGGTAGTCCAC
CP011270.1884247.1885732	D_0__Bacteria, D_1__Planctomycetes, D_2__Planctomycetacia, D_3__Planctomycetales, D_4__Rubinisphaeraceae, D_5__SH-PL14, Ambiguous_taxa	18400	731	1958.67	4.33333	2.5	0	0	0	1	0	25	0	14	0	0	0	1	3264	2137	1950	1768	2085	2769	1043	1197	889	339	455	463	TCGTGCCAGCAGCCGCGGTAATACGAACTGTGCAAACGTTATTCGGAATCACTGGGCTTACAGGGTGCGTAGGTGGCCGGACAAGTCAGGTGTGAAATCCCTCAGCTCAACTGAGGAACTGCGCTTGAAACTGTTTGGCTAGAGTGAGCTAGGGGTACTTGGAACTGCCAGTGGAGCGGTGAAATGTGTTGATATTGGCAGGAACACCGGAGCCGAAAGGGAAGTACTGGGGCTTAACTGACACTGAGGCACGAAAGCCAGGGGAGCAAACGGGATTAGATACCCCGGTAGTCCTGGCC
HAFU01069250.55.1532	D_0__Bacteria, D_1__Proteobacteria, D_2__Gammaproteobacteria, D_3__Pseudomonadales, D_4__Pseudomonadaceae, D_5__Pseudomonas, D_6__Spumella-like flagellate JBL14	3003	24.1667	131.833	268	67.1667	161	370	4	23	67	983	0	0	4	303	0	96	59	309	144	77	130	128	3	42	9	17	19	55	CTTCGTGCCAGCAGCCGCGGTAATACGAAGGGTGCAAGCGTTAATCGGAATTACTGGGCGTAAAGCGCGCGTAGGTGGTTCAGCAAGTTGGATGTGAAAGCCCCGGGCTCAACCTGGGAACTGCATCCAAAACTACTGAGCTAGAGTACGGTAGAGGGTGGTGGAATTTCCTGTGTAGCGGTGAAATGCGTAGATATAGGAAGGAACACCAGTGGCGAAGGCGACCACCTGGACTGATACTGACACTGAGGTGCGAAAGCGTGGGGAGCAAACAGGATTAGATACCCTGGTAGTCCACG
GQ264200.1.1471	D_0__Bacteria, D_1__Proteobacteria, D_2__Alphaproteobacteria, D_3__Rhizobiales, D_4__Devosiaceae, D_5__Devosia, D_6__uncultured bacterium	823	42.1667	77.5	11.3333	4.5	6	0	6	2	0	54	0	3	3	6	10	5	72	85	32	157	49	80	62	24	88	45	17	17	CTCCGTGCCAGCAGCCGCGGTAATACGAAGGGGGCTAGCGTTGTTCGGATTTACTGGGCGTAAAGCGCACGTAGGCGGATCGTTAAGTCGGGGGTGAAATCCTGGAGCTCAACTCCAGAACTGCCTTCGATACTGGCGATCTTGAGTCCGGAAGAGGTGAGTGGAACTCCTAGTGTAGAGGTGGAATTCGTAGATATTAGGAAGAACACCAGTGGCGAAGGCGGCTCACTGGTCCGGTACTGACGCTGAGGTGCGAAAGCGTGGGGAGCAAACAGGATTAGATACCCTGGTAGTCCACG
HM779259.1.1471	D_0__Bacteria, D_1__Proteobacteria, D_2__Gammaproteobacteria, D_3__Aeromonadales, D_4__Aeromonadaceae, D_5__Aeromonas, D_6__uncultured bacterium	41684	7.33333	12.6667	3532	3393.67	7715	8436	3	3	5006	29	0	0	8525	5636	0	6201	10	35	8	6	5	22	0	19	2	12	7	4	CTCCGTGCCAGCAGCCGCGGTAATACGGAGGGTCCGAGCGTTAATCGGAATTACTGGGCGTAAAGCGTGCGCAGGCGGTTTGTTAAGCGAGATGTGAAAGCCCTGGGCTCAACCTAGGAATAGCATTTCGAACTGGCGAACTAGAGTCTTGTAGAGGGGGGTAGAATTCCAGGTGTAGCGGTGAAATGCGTAGAGATCTGGAGGAATACCGGTGGCGAAGGCGGCCCCCTGGACAAAGACTGACGCTCAGGTGCGAAAGCGTGGGGAGCAAACAGGATTAGATACCCTGGTAGTCCACG
AY328708.1.1482	D_0__Bacteria, D_1__Proteobacteria, D_2__Alphaproteobacteria, D_3__Reyranellales, D_4__Reyranellaceae, D_5__Reyranella, Ambiguous_taxa	856	42	15.1667	67	27.5	4	3	117	89	0	189	30	84	2	0	49	0	4	27	4	1	0	1	58	80	98	10	1	5	CTTCGTGCCAGCAGCCGCGGTAAGACGAAGGGGGCTAGCGTTGTTCGGAATTACTGGGCGTAAAGCGAGTGTAGGTGGTTGTCATAGTCAGGTGTGAAAGCCTTGAGCTCAACTCAAGAAATGCACTTGATACTGGGCGACTAGAGGACCGGAGAGGATAGTGGAATTCCCAGTGTAGTGGTGAAATACGTAGAGATTGGGAAGAACACCAGTGGCGAAGGCGGCTATCTGGACGGTTACTGACACTAAGACTCGAAAGCGTGGGGAACAAACAGGATTAGATACCCTGGTAGTCCACG
FPLS01052488.16.1484	D_0__Bacteria, D_1__Proteobacteria, D_2__Alphaproteobacteria, D_3__Sphingomonadales, D_4__Sphingomonadaceae, D_5__Ellin6055, D_6__metagenome	1161	27.3333	25.5	55.1667	91.6667	23	3	85	80	14	126	160	258	4	8	118	2	19	13	6	28	13	37	56	34	35	21	5	13	CGTGCCAGCAGCCGCGGTAATACGGAGGGAGCTAGCGTTGTTCGGAATTACTGGGCGTAAAGCGCACGTAGGCGGCTTTGTAAGTTAGAGGTGAAAGCCCGGGGCTCAACTCCGGAATTGCCTTTAAAACTGCATCGCTTGAATCCAGGAGAGGTGAGTGGAATTCCGAGTGTAGAGGTGAAATTCGTAGATATTCGGAAGAACACCAGTGGCGAAGGCGGCTCACTGGACTGGTATTGACGCTGAGGTGCGAAAGCGTGGGGAGCAAACAGGATTAGATACCCTGGTAGTCCACGC
GQ480089.1.1468	D_0__Bacteria, D_1__Bacteroidetes, D_2__Bacteroidia, D_3__Cytophagales, D_4__Spirosomaceae, D_5__Runella, Ambiguous_taxa	1229	97.1667	43	2.5	101.167	0	0	0	15	0	0	176	241	0	0	190	0	18	2	0	0	3	1	252	195	130	0	0	6	CGTGCCAGCAGCCGCGGTAATACGTAGGTGGCAAGCGTTGTCCGGATTTATTGGGTTTAAAGGGTGCGTAGGTGGTTTAATAAGTCAGTGGTGAAAGCTGGTTGCTCAACAATCAAGTTGCCATTGATACTGTTAGACTTGAGAGAAGTGGAGGTTCATGGAATGGATGGTGTAGCGGTGAAATGCATAGATATCATCCAGAACGTCGATTGCGAAGGCAGTGGGCTGTACTTTTTCTGACACTGAGGCACGAAAGCGTGGGGATCAAACAGGATTAGATACCCTGGTAGTCCACGC
AB269656.1.1479	D_0__Bacteria, D_1__Proteobacteria, D_2__Alphaproteobacteria, D_3__Rhizobiales, D_4__Xanthobacteraceae, D_5__Afipia, Ambiguous_taxa	1785	48.3333	52	117.333	81.8333	48	9	116	293	28	210	200	207	4	5	71	4	52	21	9	89	31	98	64	67	96	30	5	28	CTTCGTGCCAGCAGCCGCGGTAATACGAAGGGGGCTAGCGTTGCTCGGAATCACTGGGCGTAAAGGGTGCGTAGGCGGGTCTTTAAGTCAGAGGTGAAATCCTGGAGCTCAACTCCAGAACTGCCTTTGATACTGAGGATCTTGAGTTCGGGAGAGGTGAGTGGAACTGCGAGTGTAGAGGTGAAATTCGTAGATATTCGCAAGAACACCAGTGGCGAAGGCGGCTCACTGGCCCGATACTGACGCTGAGGCACGAAAGCGTGGGGAGCAAACAGGATTAGATACCCTGGTAGTCCACG
HM031593.1.1478	D_0__Bacteria, D_1__Proteobacteria, D_2__Alphaproteobacteria, D_3__Sphingomonadales, D_4__Sphingomonadaceae, D_5__Novosphingobium, Ambiguous_taxa	2242	53.5	49	122	153.167	24	6	149	218	30	305	248	547	7	8	96	13	61	18	13	75	27	76	85	62	88	45	14	27	CGTGCCAGCAGCCGCGGTAATACGGAGGGAGCTAGCGTTGTTCGGAATTACTGGGCGTAAAGCGCACGTAGGCGGTTACTCAAGTCAGAGGTGAAAGCCCGGGGCTCAACCCCGGAACTGCCTTTGAAACTAGGTGACTGGAATCTTGGAGAGGCGAGTGGAATTCCGAGTGTAGAGGTGAAATTCGTAGATATTCGGAAGAACACCAGTGGCGAAGGCGACTCGCTGGACAAGTATTGACGCTGAGGTGCGAAAGCGTGGGGAGCAAACAGGATTAGATACCCTGGTAGTCCACG
HQ010809.1.1467	D_0__Bacteria, D_1__Bacteroidetes, D_2__Bacteroidia, D_3__Cytophagales, D_4__Spirosomaceae, D_5__Runella, Ambiguous_taxa	1292	21.5	167.5	0	0	0	0	0	0	0	0	0	0	0	0	0	0	159	74	135	163	211	421	1	10	25	9	56	28	CGTGCCAGCAGCCGCGGTAATACGTAGGTGGCAAGCGTTGTCCGGATTTATTGGGTTTAAAGGGTGCGTAGGTGGTTTGATAAGTCAGTGGTGAAAGCTGGTTGCTCAACAATCAAGTTGCCATTGATACTGTCGGACTTGAGAGAAGTGGAGGTTCATGGAATGGATGGTGTAGCGGTGAAATGCATAGATATCATCCAGAACGTCGATTGCGAAGGCAGTGGGCTGTACTTTATCTGACACTGAGGCACGAAAGTGTGGGGATCAAACAGGATTAGATACCCTGGTAGTCCAC
KC488627.1.1479	D_0__Bacteria, D_1__Proteobacteria, D_2__Alphaproteobacteria, D_3__Rhizobiales, D_4__Rhizobiaceae, Ambiguous_taxa, Ambiguous_taxa	1954	26	129.5	123.667	38.6667	3	19	41	360	65	254	40	84	14	5	63	26	91	67	53	213	189	211	44	32	13	25	9	33	CTTCGTGCCAGCAGCCGCGGTAATACGAAGGGGGCTAGCGTTGTTCGGAATTACTGGGCGTAAAGCGCACGTAGGCGGGTATTTAAGTCAGGGGTGAAATCCCAGAGCTCAACTCTGGAACTGCCTTTGATACTGGGTACCTAGAGTATGGAAGAGGTAAGTGGAATTCCGAGTGTAGAGGTGAAATTCGTAGATATTCGGAGGAACACCAGTGGCGAAGGCGGCTTACTGGTCCATTACTGACGCTGAGGTGCGAAAGCGTGGGGAGCAAACAGGATTAGATACCCTGGTAGTCCACG
HM780088.1.1464	D_0__Bacteria, D_1__Proteobacteria, D_2__Alphaproteobacteria, D_3__Reyranellales, D_4__Reyranellaceae, D_5__Reyranella, Ambiguous_taxa	1885	90	33.1667	152.5	56.6667	5	1	248	190	0	471	53	173	4	2	107	1	10	53	11	5	6	5	119	187	193	31	2	8	CTTCGTGCCAGCAGCCGCGGTAAGACGAAGGGGGCTAGCGTTGTTCGGAATTACTGGGCGTAAAGCGAGTGTAGGTGGTTGTCATAGTCAGGTGTGAAAGCCTTGAGCTCAACTCAAGAAATGCACTTGATACTGGGCGACTAGAGGACCGGAGAGGATAGTGGAATTCCCAGTGTAGTGGTGAAATACGTAGAGATTGGGAAGAACACCAGTGGCGAAGGCGGCTATCTGGACGGTTACTGACACTAAGACTCGAAAGCGTGGGGAGCAAACAGGATTAGATACCCCGGTAGTCCACG
AY250104.1.1457	D_0__Bacteria, D_1__Proteobacteria, D_2__Gammaproteobacteria, D_3__Betaproteobacteriales, D_4__Burkholderiaceae, D_5__uncultured, D_6__uncultured bacterium	7192	544.167	363.667	40.1667	301.667	3	19	16	110	0	93	245	320	0	0	1245	0	359	107	184	266	435	525	665	845	513	366	327	549	CTACGTGCCAGCAGCCGCGGTAATACGTAGGGTGCAAGCGTTAATCGGAATTACTGGGCGTAAAGCGTGCGCAGGCGGTTATGTAAGACAGATGTGAAATCCCCGGGCTCAACCTGGGAACTGCATTTGTGACTGTATAGCTAGAGTACGGCAGAGGGGGATGGAATTCCGCGTGTAGCAGTGAAATGCGTAGATATGCGGAGGAACACCGATGGCGAAGGCAATCCCCTGGGCCTGTACTGACGCTCATGCACGAAAGCGTGGGGAGCAAACAGGATTAGATACCCCGGTAGTCCACGC
KU525082.1.1457	D_0__Bacteria, D_1__Proteobacteria, D_2__Gammaproteobacteria, D_3__Aeromonadales, D_4__Aeromonadaceae, D_5__Aeromonas, Ambiguous_taxa	24387	26.5	37.5	2009.5	1992	4427	4415	21	14	3141	39	11	18	4841	3673	9	3400	24	75	30	32	24	34	30	39	26	24	21	19	CTCCGTGCCAGCAGCCGCGGTAATACGGAGGGTGCAAGCGTTAATCGGAATTACTGGGCGTAAAGCGCACGCAGGCGGTTGGATAAGTTAGATGTGAAAGCCCCGGGCTCAACCTGGGAATTGCATTTAAAACTGTCCAGCTAGAGTCTTGTAGAGGGGGGTAGAATTCCAGGTGTAGCGGTGAAATGCGTAGAGATCTGGAGGAATACCGGTGGCGAAGGCGGCCCCCTGGACAAAGACTGACGCTCATGTGCGAAAGCGTGGGGAGCAAACAGGATTAGATACCCTGGTAGTCCACGC
KC344852.1.1456	D_0__Bacteria, D_1__Proteobacteria, D_2__Gammaproteobacteria, D_3__Aeromonadales, D_4__Aeromonadaceae, D_5__Aeromonas, Ambiguous_taxa	3085	165	112.5	250.5	47.6667	833	284	19	6	346	15	4	2	58	183	4	35	5	152	42	73	12	22	374	259	335	9	2	11	CTCCGTGCCAGCAGCCGCGGTAATACGGAGGGTGCAAGCGTTAATCGGAATTACTGGGCGTAAAGCGCACGCAGGCGGTTGGATAAGTTAGATGTGAAAGCCCCGGGCTCAACCTGGGAATTGCATTTAAAACTGTCCGGCTAGAGTCTTGTAGAGGGGGGTAGAATTCCAGGTGTAGCGGTGAAATGCGTAGAGATCTGGAGGAATACCGGTGGCGAAGGCGGCCCCCTGGACAAAGACTGACGCTCAGGTGCGAAAGCGTGGGGAGCAAACAGGATTAGATACCCTGGTAGTCCACGC
FPLK01000718.10.1458	D_0__Bacteria, D_1__Proteobacteria, D_2__Alphaproteobacteria, D_3__Rhodobacterales, D_4__Rhodobacteraceae, Ambiguous_taxa, Ambiguous_taxa	1023	0	0	170.5	0	0	0	402	137	0	484	0	0	0	0	0	0	0	0	0	0	0	0	0	0	0	0	0	0	CTCCGTGCCAGCAGCCGCGGTAATACGGAGGGGGCTAGCGTTGTTCGGAATTACTGGGCGTAAAGCGCACGTAGGCGGATCAGAAAGTCAGAGGTGAAATCCCAGGGCTCAACCTTGGAACTGCCTTTGAAACTCCTGGTCTTGAGGTCGAGAGAGGTGAGTGGAATTCCGAGTGTAGAGGTGAAATTCGTAGATATTCGGAGGAACACCAGTGGCGAAGGCGGCTCACTGGCTCGATACTGACGCTGAGGTGCGAAAGCGTGGGGAGCAAACAGGATTAGATACCCTGGTAGTCCACG
AY468474.1.1448	D_0__Bacteria, D_1__Bacteroidetes, D_2__Bacteroidia, D_3__Flavobacteriales, D_4__Weeksellaceae, D_5__Chryseobacterium, Ambiguous_taxa	4041	201.333	146.333	64.3333	306.833	0	0	137	98	0	151	1838	0	0	0	3	0	15	64	35	156	222	114	287	73	141	196	274	237	CGTGCCAGCAGCCGCGGTAATACGGAGGGTGCAAGCGTTATCCGGATTTATTGGGTTTAAAGGGTCCGTAGGCGGATCCGTAAGTCAGTGGTGAAATCTCATAGCTTAACTATGAAACTGCCATTGATACTGCGGGTCTTGAGTAAGGTAGAAGTAGCTGGAATAAGTAGTGTAGCGGTGAAATGCATAGATATTACTTAGAACACCAATTGCGAAGGCAGGTTACTATGTCTTAACTGACGCTGATGGACGAAAGCGTGGGGAGCGAACAGGATTAGATACCCTGGTAGTCCACGC
FJ624432.1.1448	D_0__Bacteria, D_1__Proteobacteria, D_2__Alphaproteobacteria, D_3__Rhodospirillales, D_4__Rhodospirillaceae, D_5__Novispirillum, Ambiguous_taxa	3213	355.667	170.667	0	54.3333	0	0	0	0	0	0	264	0	0	0	62	0	28	333	121	66	123	82	299	309	297	255	563	411	CTTCGTGCCAGCAGCCGCGGTAATACGAAGGGGGCTAGCGTTGTTCGGAATTACTGGGCGTAAAGCGCGCGTAGGCGGCTTTGTCAGTCAGGGGTGAAATCCCGGGGCTTAACCTCGGAACTGCCCTTGATACTGCAAGGCTTGAGTCTGTGAGAGGATGGTGGAATACCCAGTGTAGAGGTGAAATTCGTAGATATTGGGTGGAACACCAGTGGCGAAGGCGGCCATCTGGCACAGTACTGACGCTGAGGTGCGAAAGCGTGGGGAGCAAACAGGATTAGATACCCTGGTAGTCCACG
FPLP01001504.15.1460	D_0__Bacteria, D_1__Proteobacteria, D_2__Alphaproteobacteria, D_3__Rhodobacterales, D_4__Rhodobacteraceae, D_5__Gemmobacter, Ambiguous_taxa	4620	114.833	80	573.333	0	0	0	702	1313	0	1425	0	0	0	0	0	0	145	2	19	103	110	112	134	147	215	49	93	51	CGTGCCAGCAGCCGCGGTAATACGGAGGGGGCTAGCGTTGTTCGGAATTACTGGGCGTAAAGCGCACGTAGGCGGAACAGAAAGTCAGAGGTGAAATCCCAGGGCTCAACCTTGGAACTGCCTTTGAAACTCCTGTTCTTGAGGTCGAGAGAGGTGAGTGGAATTCCGAGTGTAGAGGTGAAATTCGTAGATATTCGGAGGAACACCAGTGGCGAAGGCGGCTCACTGGCTCGATACTGACGCTGAGGTGCGAAAGCGTGGGGAGCAAACAGGATTAGATACCCTGGTAGTCCACGC
FOZM01000007.3945.5410	D_0__Bacteria, D_1__Proteobacteria, D_2__Alphaproteobacteria, D_3__Rhodobacterales, D_4__Rhodobacteraceae, D_5__Loktanella, Ambiguous_taxa	870	0.5	0.333333	144.5	0	0	0	115	642	0	110	0	0	0	0	0	0	0	0	0	0	0	0	2	0	0	0	1	0	CGTGCCAGCAGCCGCGGTAATACGGAGGGGGTTAGCGTTGTTCGGAATTACTGGGCGTAAAGCGCGCGTAGGCGGATTGGAAAGTTGGGGGTGAAATCCCGGGGCTCAACCCCGGAACTGCCTCCAAAACTATCAGTCTAGAGTTCGAGAGAGGTGAGTGGAATTCCAAGTGTAGAGGTGAAATTCGTAGATATTTGGAGGAACACCAGTGGCGAAGGCGGCTCACTGGCTCGATACTGACGCTGAGGTGCGAAAGTGTGGGGAGCAAACAGGATTAGATACCCTGGTAGTCCA
FJ645062.1.1436	D_0__Bacteria, D_1__Proteobacteria, D_2__Gammaproteobacteria, D_3__Alteromonadales, D_4__Alteromonadaceae, D_5__Rheinheimera, Ambiguous_taxa	2174	294.667	65.8333	0.5	21.8333	0	3	0	0	0	0	59	47	0	3	21	1	7	88	25	16	102	34	130	212	148	409	491	378	CTGTGCCAGCAGCCGCGGTAATACAGAGGGTGCAAGCGTTAATCGGAATTACTGGGCGTAAAGCGCACGTAGGCGGTTTTTTAAGTCAGATGTGAAAGCCCCGGGCTCAACCTGGGAATTGCATTTGAAACTGGGAAACTAGAGTGTGTGAGAGGGGGGTAGAATTCCAAGTGTAGCGGTGAAATGCGTAGAGATTTGGAGGAATACCAGTGGCGAAGGCGGCCCCCTGGCACAACACTGACGCTCAGGTGCGAAAGCGTGGGGAGCAAACAGGATTAGATACCCTGGTAGTCCACG
KF358271.1.1428	D_0__Bacteria, D_1__Bacteroidetes, D_2__Bacteroidia, D_3__Sphingobacteriales, D_4__Sphingobacteriaceae, D_5__Nubsella, Ambiguous_taxa	1839	136.167	181.167	0.166667	3.5	1	0	0	0	0	0	4	1	2	3	7	4	107	78	30	210	405	170	194	121	152	75	109	166	CTCCGTGCCAGCAGCCGCGGTAATACGGAGGATCCAAGCGTTATCCGGATTTATTGGGTTTAAAGGGTGCGTAGGCGGCCTGTTAAGTCAGGGGTGAAAGACGGTGGCTCAACCATCGCAGTGCCCTTGATACTGATGGGCTTGAATGGACTAGAGGTAGGCGGAATGTGACAAGTAGCGGTGAAATGCATAGATATGTCACAGAACACCGATTGCGAAGGCAGCTTACTATGGTTTTATTGACGCTGAGGCACGAAAGCGTGGGGATCGAACAGGATTAGATACCCTGGTAGTCCACG
EU799019.1.1425	D_0__Bacteria, D_1__Proteobacteria, D_2__Alphaproteobacteria, D_3__Rhodobacterales, D_4__Rhodobacteraceae, D_5__Roseobacter, D_6__uncultured bacterium	921	1.16667	1.16667	152.333	0	0	0	277	594	0	43	0	0	0	0	0	0	0	0	0	0	0	0	7	0	0	0	0	0	CGTGCCAGCAGCCGCGGTAATACGGAGGGGGTTAGCGTTGTTCGGAATTACTGGGCGTAAAGCGCACGTAGGCGGATTGGAAAGTTGGGGGTGAAATCCCGGGGCTCAACCCCGGAACTGCCTTCAAAACTATCAGTCTAGAGTTCGAGAGAGGTGAGTGGAATTCCAAGTGTAGAGGTGAAATTCGTAGATATTTGGAGGAACACCAGTGGCGAAGGCGGCTCACTGGCTCGATACTGACGCTGAGGTGCGAAAGTGTGGGGAGCAAACAGGATTAGATACCCTGGTAGTCCA
KP204490.1.1421	D_0__Bacteria, D_1__Proteobacteria, D_2__Alphaproteobacteria, D_3__Rhodobacterales, D_4__Rhodobacteraceae, Ambiguous_taxa, Ambiguous_taxa	10986	1208.67	881.167	4.33333	19.5	12	2	0	10	2	0	14	18	1	25	46	13	180	88	82	991	1003	1247	1876	2268	2209	309	330	260	CGTGCCAGCAGCCGCGGTAATACGGAGGGGGCTAGCGTTGTTCGGAATTACTGGGCGTAAAGCGCACGTAGGCGGACTGGAAAGTCAGAGGTGAAATCCCAGGGCTCAACCTTGGAACTGCCTTTGAAACTCCCGGTCTTGAGGTCGAGAGAGGTGAGTGGAATTCCGAGTGTAGAGGTGAAATTCGTAGATATTCGGAGGAACACCAGTGGCGAAGGCGGCTCACTGGCTCGATACTGACGCTGAGGTGCGAAAGCGTGGGGAGCAAACAGGATTAGATACCCTGGTAGTCCACG
HQ860725.1.1420	D_0__Bacteria, D_1__Proteobacteria, D_2__Gammaproteobacteria, D_3__Betaproteobacteriales, D_4__Rhodocyclaceae, D_5__C39, D_6__uncultured bacterium	3118	155.167	104	280.167	0	0	0	520	447	0	714	0	0	0	0	0	0	11	34	6	207	125	123	129	217	220	144	118	103	CTACGTGCCAGCAGCCGCGGTAATACGTAGGGTGCGAGCGTTAATCGGAATTACTGGGCGTAAAGCGTGCGCAGGCGGTTGTGCAAGACAGATGTGAAATCCCCGGGCTCAACCTGGGAACTGCATTTGTGACTGCACGACTAGAGTACGGCAGAGGGGGGTAGAATTCCACGTGTAGCAGTGAAATGCGTAGAGATGTGGAGGAATACCGATGGCGAAGGCAGCCCCCTGGGCCGATACTGACGCTCATGCACGAAAGCGTGGGGAGCAAACAGGATTAGATACCCTGGTAGTCCACG
LC094617.1.1418	D_0__Bacteria, D_1__Actinobacteria, D_2__Actinobacteria, D_3__Micrococcales, D_4__Microbacteriaceae, D_5__Leifsonia, D_6__Microbacteriaceae bacterium MAEY21	5456	434	235	351.833	2.33333	0	0	545	559	0	1007	0	13	0	0	1	0	1	1	1	258	245	221	684	833	807	144	72	64	CGTGCCAGCAGCCGCGGTAATACGTAGGGTGCAAGCGTTGTCCGGAATTATTGGGCGTAAAGAGCTCGTAGGCGGTTTGTCGCGTCTGCTGTGAAAACCCGAGGCTCAACCTCGGGCCTGCAGTGGGTACGGGCAGACTAGAGTGCGGTAGGGGAGAATGGAATTCCTGGTGTAGCGGTGGAATGCGCAGATATCAGGAGGAACACCAATGGCGAAGGCAGTTCTCTGGGCCGTAACTGACGCTGAGGAGCGAAAGCGTGGGGAGCGAACAGGATTAGATACCCTGGTAGTCCACGC
DQ814980.1.1413	D_0__Bacteria, D_1__Proteobacteria, D_2__Gammaproteobacteria, D_3__Aeromonadales, D_4__Aeromonadaceae, D_5__Aeromonas, D_6__uncultured bacterium	6262	184.333	226.833	373	276.5	903	341	328	165	409	92	45	154	410	677	89	284	139	264	145	309	222	180	241	185	314	159	96	111	CTGTGCCAGCAGCCGCGGTAATACGGAGGGTGCAAGCGTTAATCGGAATTACTGGGCGTAAAGCGCACGCAGGCGGTTGGATAAGTTAGATGTGAAAGCCCCGGGCTCAACCTGGGAATTGCATTTAAAACTGTCCAGCTAGAGTCTTGTAGAGGGGGGTAGAATTCCAGGTGTAGCGGTGAAATGCGTAGAGATCCGGAGGAATACCGGTGGCGAAGGCGGCCCCCTGGACAAAGACTGACGCTCAGGTGCGAAAGCGTGGGGAGCAAACAGGATTAGATACCCTGGTAGTCCACG
JN867359.1.1409	D_0__Bacteria, D_1__Proteobacteria, D_2__Alphaproteobacteria, D_3__Rhizobiales, D_4__Rhizobiaceae, D_5__Ensifer, Ambiguous_taxa	14250	559.833	1512.33	88.6667	1.66667	9	5	74	357	1	86	0	0	6	1	3	0	1806	2654	2964	771	875	1279	531	549	929	414	411	525	CTTCGTGCCAGCAGCCGCGGTAATACGAAGGGGGCTAGCGTTGTTCGGAATTACTGGGCGTAAAGCGCACGTAGGCGGACATTTAAGTCAGGGGTGAAATCCCAGAGCTCAACTCTGGAACTGCCTTTGATACTGGGTGTCTAGAGTATGGAAGAGGTGAGTGGAATTCCGAGTGTAGAGGTGAAATTCGTAGATATTCGGAGGAACACCAGTGGCGAAGGCGGCTCACTGGTCCATTACTGACGCTGAGGTGCGAAAGCGTGGGGAGCAAACAGGATTAGATACCCTGGTAGTCCACGCC
KY048277.1.1406	D_0__Bacteria, D_1__Proteobacteria, D_2__Alphaproteobacteria, D_3__Rhizobiales, D_4__Rhizobiaceae, D_5__Ensifer, D_6__Ensifer sp.	2176	34.8333	93.1667	207	9.5	0	0	204	808	0	230	15	35	5	0	1	1	121	138	92	76	64	177	12	10	20	30	48	89	CTTCGTGCCAGCAGCCGCGGTAATACGAAGGGGGCTAGCGTTGTTCGGAATTACTGGGCGTAAAGCGCACGTAGGCGGACATTTAAGTCAGGGGTGAAATCCCGGGGCTCAACCCCGGAACTGCCTTTGATACTGGGTGTCTAGAGTATGGAAGAGGTGAGTGGAATTCCGAGTGTAGAGGTGAAATTCGTAGATATTCGGAGGAACACCAGTGGCGAAGGCGGCTCACTGGTCCATTACTGACGCTGAGGTGCGAAAGCGTGGGGAGCAAACAGGATTAGATACCCTGGTAGTCCACG
KM035949.1.1400	D_0__Bacteria, D_1__Proteobacteria, D_2__Alphaproteobacteria, D_3__Rhizobiales, D_4__Beijerinckiaceae, D_5__Bosea, Ambiguous_taxa	2476	86.3333	173.167	102.333	18.5	28	3	113	333	0	137	66	15	2	6	18	4	259	169	102	285	96	322	65	116	73	90	65	109	CTTCGTGCCAGCAGCCGCGGTAATACGAAGGGGGCTAGCGTTGCTCGGAATCACTGGGCGTAAAGGGCGCGTAGGCGGACTTTTAAGTCGGAGGTGAAAGCCCAGGGCTCAACCCTGGAATTGCCTTCGATACTGGGAGTCTTGAGTTCGGAAGAGGTTGGTGGAACTGCGAGTGTAGAGGTGAAATTCGTAGATATTCGCAAGAACACCGGTGGCGAAGGCGGCCAACTGGTCCGAAACTGACGCTGAGGCGCGAAAGCGTGGGGAGCAAACAGGATTAGATACCCTGGTAGTCCACGC
KC505151.1.1394	D_0__Bacteria, D_1__Proteobacteria, D_2__Gammaproteobacteria, D_3__Betaproteobacteriales, D_4__Burkholderiaceae, D_5__Aquabacterium, D_6__Aquabacterium sp. JJ2211	1705	110	153.167	4.66667	7.5	1	3	9	11	0	4	25	5	2	2	11	0	162	217	211	109	161	112	109	146	92	106	89	118	CTACGTGCCAGCAGCCGCGGTAATACGTAGGGTGCGAGCGTTAATCGGAATTACTGGGCGTAAAGCGTGCGCAGGCGGTTATGCAAGACAGAGGTGAAATCCCCGGGCTCAACCTGGGAACTGCCTTTGTGACTGCATAGCTAGAGTACGGTAGAGGGGGATGGAATTCCGCGTGTAGCAGTGAAATGCGTAGATATGCGGAGGAACACCGATGGCGAAGGCAATCCCCTGGACCTGTACTGACGCTCATGCACGAAAGCGTGGGGAGCAAACAGGATTAGATACCCTGGTAGTCCACG
HG917679.1.1385	D_0__Bacteria, D_1__Proteobacteria, D_2__Alphaproteobacteria, D_3__Rhodobacterales, D_4__Rhodobacteraceae, D_5__Pseudorhodobacter, Ambiguous_taxa	1146	0	0	191	0	0	0	272	331	0	543	0	0	0	0	0	0	0	0	0	0	0	0	0	0	0	0	0	0	CGTGCCAGCAGCCGCGGTAATACGGAGGGGGCTAGCGTTATTCGGAATTACTGGGCGTAAAGCGCACGTAGGCGGACTGAAAAGTCAGAGGTGAAATCCCAGGGCTCAACCTTGGAACTGCCTTTGAAACTCTCAGTCTTGAGGTCGAGAGAGGTGAGTGGAATTCCGAGTGTAGAGGTGAAATTCGTAGATATTCGGAGGAACACCAGTGGCGAAGGCGGCTCACTGGCTCGATACTGACGCTGAGGTGCGAAAGCGTGGGGAGCAAACAGGATTAGATACCCTGGTAGTCCACG
EU434509.1.1378	D_0__Bacteria, D_1__Proteobacteria, D_2__Alphaproteobacteria, D_3__Caulobacterales, D_4__Caulobacteraceae, D_5__Brevundimonas, Ambiguous_taxa	801	6.33333	4.66667	114.667	9	1	0	200	330	0	157	0	53	0	0	0	1	9	0	5	0	1	6	16	3	5	5	0	9	CTTCGTGCCAGCAGCCGCGGTAATACGAAGGGGGCTAGCGTTGCTCGGAATTACTGGGCGTAAAGGGCGCGTAGGCGGATCGTTAAGTCAGAGGTGAAATCCCGGAGCTCAACTTCGGAACTGCCTTTGATACTGGCGATCTTGAGTGTGAGAGAGGTATGTGGAACTCCGAGTGTAGAGGTGAAATTCGTAGATATTCGGAAGAACACCAGTGGCGAAGGCGACATACTGGCTCATTACTGACGCTGAGGCGCGAAAGCGTGGGGAGCAAACAGGATTAGATACCCTGGTAGTCCACG
FR749870.1.1370	D_0__Bacteria, D_1__Proteobacteria, D_2__Gammaproteobacteria, D_3__Xanthomonadales, D_4__Xanthomonadaceae, D_5__Stenotrophomonas, D_6__Pseudomonas sp. CNE 23	817	5.83333	25.1667	98.5	0.666667	24	551	0	0	3	13	0	2	1	0	0	1	42	67	48	3	6	21	6	14	11	2	1	1	CTTTGTGCCAGCAGCCGCGGTAATACGAAGGGTGCAAGCGTTACTCGGAATTACTGGGCGTAAAGCGTGCGTAGGTGGTCGTTTAAGTCCGTTGTGAAAGCCCTGGGCTCAACCTGGGAACTGCAGTGGATACTGGGCGACTAGAGTGTGGTAGAGGGTAGCGGAATTCCTGGTGTAGCAGTGAAATGCGTAGAGATCAGGAGGAACATCCATGGCGAAGGCAGCTACCTGGACCAACACTGACACTGAGGCACGAAAGCGTGGGGAGCAAACAGGATTAGATACCCTGGTAGTCCACGCC
HAFU01069247.55.1411	D_0__Bacteria, D_1__Proteobacteria, D_2__Gammaproteobacteria, D_3__Pseudomonadales, D_4__Pseudomonadaceae, D_5__Pseudomonas, D_6__Spumella-like flagellate JBL14	25150	587.167	633.5	2747.5	270.5	31	11	4360	3992	4	8087	283	1064	9	10	248	9	725	364	241	775	746	668	1007	1025	1024	174	122	171	CTTCGTGCCAGCAGCCGCGGTAATACGAAGGGGGCTAGCGTTGTTCGGAATTACTGGGCGTAAAGCGAGTGTAGGTGGTTGTTCAAGTTGGATGTGAAAGCCTTGAGCTCAACTCAAGAAATGCATTCAGGACTGAGCGACTAGAGGACCGGAGAGGATAGTGGAATTCCCAGTGTAGTGGTGAAATACGTAGAGATTGGGAAGAACACCAGTGGCGAAGGCGGCTATCTGGACGGTTTCTGACACTAAGACTCGAAAGCGTGGGGAGCAAACAGGATTAGATACCCTGGTAGTCCACGCC
AF427150.1.1350	D_0__Bacteria, D_1__Proteobacteria, D_2__Gammaproteobacteria, D_3__Aeromonadales, D_4__Aeromonadaceae, D_5__Aeromonas, D_6__Aeromonas sp. PAR2A	756	25	28.6667	36.3333	39.1667	76	28	33	23	41	17	9	20	56	87	22	41	10	34	20	40	31	18	29	27	45	18	13	18	CGGGCCAGCAGCCGCGGTAATACGGAGGGTGCAAGCGTTAATCGGAATTACTGGGCGTAAAGCGCACGCAGGCGGTTGGATAAGTTAGATGTGAAAGCCCCGGGCTCAACCTGGGAATTGCATTTAAAACTGTCCAGCTAGAGTCTTGTAGAGGGGGGTAGAATTCCAGGTGTAGCGGTGAAATGCGTAGAGATCTGGAGGAATACCGGTGGCGAAGGCGGCCCCCTGGACAAAGACTGACGCTCAGGTGCGAAAGCGTGGGGAGCAAACAGGATTAGATACCCTGGTAGTCCACG
GQ231374.1.1331	D_0__Bacteria, D_1__Proteobacteria, D_2__Gammaproteobacteria, D_3__Pseudomonadales, D_4__Pseudomonadaceae, D_5__Pseudomonas, D_6__uncultured bacterium	1228	84	109.667	16.3333	1.66667	1	26	22	4	12	33	4	0	0	4	0	2	38	248	119	55	71	85	80	106	120	62	71	65	ACTTCGTGCCAGCAGCCGCGGTAATACGAAGGGTGCAAGCGTTAATCGGAATTACTGGGCGTAAAGCGCGCGTAGGTGGTTCAGCAAGTTGGAGGTGAAATCCCCGGGCTCAACCTGGGAACTGCCTCCAAAACTACTGAGCTAGAGTACGGTAGAGGGTGGTGGAATTTCCTGTGTAGCGGTGAAATGCGTAGATATAGGAAGGAACACCAGTGGCGAAGGCGACCACCTGGACTGATACTGACACTGAGGTGCGAAAGCGTGGGGAGCAAACAGGATTAGATACCCTGGTAGTCCACG
HQ377322.1.1290	D_0__Bacteria, D_1__Bacteroidetes, D_2__Bacteroidia, D_3__Flavobacteriales, D_4__Weeksellaceae, D_5__Chryseobacterium, D_6__Chryseobacterium formosense	2066	121.5	90.8333	37	127.667	0	0	52	103	0	67	764	1	0	0	1	0	13	29	6	54	190	57	209	64	91	110	129	126	CTCCGTGCCAGCAGCCGCGGTAATACGGAGGGTGCAAGCGTTATCCGGATTTATTGGGTTTAAAGGGTCCGTAGGCGGATCTGTAAGTCAGTGGTGAAATCTCATAGCTTAACTATGAAACTGCCATTGATACTGCAGGTCTTGAGTAAGGTAGAAGTAGCTGGAATAAGTAGTGTAGCGGTGAAATGCATAGATATTACTTAGAACACCAATTGCGAAGGCAGGTTACTATGTCTTAACTGACGCTGATGGACGAAAGCGTGGGGAGCGAACAGGATTAGATACCCTGGTAGTCCACG
HG763856.1.1279	D_0__Bacteria, D_1__Proteobacteria, D_2__Gammaproteobacteria, D_3__Aeromonadales, D_4__Aeromonadaceae, D_5__Aeromonas, D_6__Aeromonas sp. SAL-12	4237	208	304.333	113.833	96	166	29	207	98	56	127	78	151	57	126	123	41	167	405	266	332	306	254	263	241	295	175	142	132	CTCCGTGCCAGCAGCCGCGGATAATACGTAGGGTGCAAGCGTTAATCGGAATTACTGGGCGTAAAGCGCACGCAGGCGGTTGGATAAGTTAGATGTGAAAGCCCCGGGCTCAACCTGGGAATTGCATTTAAAACTGTCCAGCTAGAGTCTTGTAGAGGGGGGTAGAATTCCAGGTGTAGCGGTGAAATGCGTAGAGATCTGGAGGAATACCGGTGGCGAAGGCGGCCCCCTGGACAAAGACTGACGCTCAGGTGCGAAAGCGTGGGGAGCAAACAGGATTAGATACCCTGGTAGTCCACGC
KF464752.1.1266	D_0__Bacteria, D_1__Proteobacteria, D_2__Gammaproteobacteria, D_3__Enterobacteriales, D_4__Enterobacteriaceae, D_5__Enterobacter, D_6__uncultured bacterium	1211	154	56.5	3	1.66667	0	13	0	1	0	4	2	0	0	6	1	1	16	52	20	54	89	28	96	77	83	221	254	193	CTGTGCCAGCAGCCGCGGTAATACAGAGGGTGCAAGCGTTAATCGGAATTACTGGGCGTAAAGCGCACGTAGGCGGTTTTTTAAGTCAGATGTGAAAGCCCCGGGCTCAACCTGGGAATTGCATTTGAAACTGGAAAACTAGAGTGTGTGAGAGGGGGGTAGAATTCCAAGTGTAGCGGTGAAATGCGTAGAGATCTGGAGGAATACCGGTGGCGAAGGCGGCCCCCTGGACAAAGACTGACGCTCAGGTGCGAAAGCGTGGGGAGCAAACAGGATTAGATACCCTGGTAGTCCACG
KF697428.1.1227	D_0__Bacteria, D_1__Proteobacteria, D_2__Gammaproteobacteria, D_3__Betaproteobacteriales, D_4__Burkholderiaceae, D_5__Acidovorax, D_6__uncultured bacterium	1017	42.5	83.6667	10.8333	20.6667	3	1	15	13	0	33	33	46	2	0	43	0	120	92	113	83	63	102	49	43	22	39	56	46	CTACGTGCCAGCAGCCGCGGTAATACGTAGGGTGCGAGCGTTAATCGGAATTACTGGGCGTAAAGCGTGCGCAGGCGGTTATGTAAGACAGATGTGAAATCCCCGGGCTCAACCTGGGAACTGCATTTGTGACTGCATAGCTAGAGTACGGCAGAGGGGGATGGAATTCCGCGTGTAGCAGTGAAATGCGTAGATATGCGGAGGAACACCGATGGCGAAGGCAATCCCCTGGGCCTGCACTGACGCTCATGCACGAAAGCGTGGGGAGCAAACAGGATTAGATACCCTGGTAGTCCACG
OTU-001	D_0__Bacteria, D_1__Proteobacteria, D_2__Gammaproteobacteria, , , ,	1417	49.8333	49	79.6667	59.6667	154	90	76	33	100	25	16	27	104	126	25	60	32	47	36	70	59	38	44	46	58	52	45	54	ACGTGCCAGCCGCCGCGGTAATACGGAGGGTGCAAGCGTTAATCGGAATTACTGGGCGTAAAGCGCACGCAGGCGGTTGGATAAGTTAGATGTGAAAGCCCCGGGCTCAACCTGGGAATTGCATTTAAAACTGTCCAGCTAGAGTCTTGTAGAGGGGGGTAGAATTCCAGGTGTAGCGGTGAAATGCGTAGAGATCTGGAGGAATACCGGTGGCGAAGGCGGCCCCCTGGACAAAGACTGACGCTCAGGKGCGAAAGCGTGGGGAGCAAACAGGATTAGAAACCCGGGTAGTCCAGACCAAGTATCC
OTU-002	D_0__Bacteria, D_1__Bacteroidetes, D_2__Bacteroidia, D_3__Cytophagales, D_4__Spirosomaceae, D_5__Arsenicibacter, Ambiguous_taxa	31435	3993.83	1863	111.667	393.833	91	31	217	265	6	60	796	965	48	66	465	23	68	88	90	1475	1920	798	6807	6032	6224	1528	1626	1746	ACGTGCCAGCCGCCGCGGTAATACGGAGGGTGCAAGCGTTGTCCGGATTTATTGGGTTTAAAGGGTGCGTAGGTGGTTTAGTAAGTCTGGTTTGAAAGTCAGCCGCTTAACGGTTGAGGGTGGCTGGATACTGCTGAACTTGAATTTTTCGGAGGCAGGCGGAACGGGTTGTGTAGCGGTGAAATGCATAGATATGACCCAGAACACCGATTGCGAAGGCAGCCTGCTACGAATGAATTGACACTGAGGCACGAGAGCATGGGGAGCAAACAGGATTAGAAACCCCAGTAGTCCA
OTU-004	D_0__Bacteria, D_1__Proteobacteria, D_2__Gammaproteobacteria, D_3__Betaproteobacteriales, D_4__Burkholderiaceae, D_5__Herminiimonas, D_6__uncultured bacterium	9669	987.5	656	1.16667	0	0	7	0	0	0	0	0	0	0	0	0	0	287	1001	850	331	858	410	486	1113	646	614	1393	1673	GTGCCAGCAGCCGCGGTAATACGTAGGGTGCAAGCGTTAATCGGAATTACTGGGCGTAAAGCGTGCGCAGGCGGTTGATTAAGTTTGATGTGAAATCCCCGGGCTTAACCTGGGAACTGCATTGAATACTGGTCAGCTAGAGTGTGTCAGAGGGGGGTAGAATTCCACGTGTAGCAGTGAAATGCGTAGAGATGTGGAGGAATACCGATGGCGAAGGCAGCCCCCTGGGATAACACTGACGCTCATGCACGAAAGCGTGGGGAGCAAACAGGATTAGAAACCCCAGTAGTCCGT
OTU-005	D_0__Bacteria, D_1__Planctomycetes, D_2__Planctomycetacia, D_3__Planctomycetales, D_4__Rubinisphaeraceae, D_5__SH-PL14, Ambiguous_taxa	1030	43	105.333	0.333333	0.166667	0	0	0	0	0	2	0	1	0	0	0	0	195	116	94	105	115	144	58	63	54	27	28	28	TGTGCCAGCAGCCGCGGTAATACGAACTGTGCGAACGTTATTCGGAATCACTGGGCTTACAGGGTGCGTAGGTGGCCGGACAAGTCAGGTGTGAAATCCCTCAGCTCAACTGAGGAACTGCGCTTGAAACTGTTTGGCTAGAGTGAGCTAGGGGTGCTTGGAACTGCCAGTGGAGCGGTGAAATGTGTTGATATTGGCAGGAACACCGGAGCCGAAAGGGAAGCACTGGGGCTTAACTGACACTGAGGCACGAAAGCCAGGGGAGCAAACGGGATTAGAAACCCTTGTAGTCCGTAGACC
OTU-006	D_0__Bacteria, D_1__Proteobacteria, D_2__Gammaproteobacteria, D_3__Pseudomonadales, D_4__Pseudomonadaceae, D_5__Pseudomonas,	862	34.8333	88.5	7.66667	6.16667	2	1	17	13	3	10	5	8	7	4	4	9	85	106	125	90	77	87	46	51	53	15	20	24	ACGTGCCAGCCGCCGCGGTAATACAGAGGGTGCGAGCGTTAATCGGAATTACTGGGCGTAAAGCGCGCGTAGGTGGTTCGTTAAGTTGGATGTGAAAGCCCCGGGCTCAACCTGGGAACTGCATCCAAAACTGGCGAGCTAGAGTATGGTAGAGGGTGGTGGAATTTCCTGTGTAGCGGTGAAATGCGTAGATATAGGAAGGAACACCAGTGGCGAAGGCGACCACCTGGACTGATACTGACACTGAGGKGCGAAAGCGTGGGGAGCAAACAGGATTAGAAACCCCAGTAGTCCTAG
OTU-008	D_0__Bacteria, D_1__Proteobacteria, D_2__Gammaproteobacteria, D_3__Oceanospirillales, D_4__Halomonadaceae, D_5__HdN1, D_6__gamma proteobacterium HdN1	2059	99.1667	235.333	0	0	0	0	0	0	0	0	0	0	0	0	0	0	56	238	101	334	590	145	4	17	0	151	213	210	GTGCCAGCAGCCGCGGTAATACGGAGGGTGCGAGCGTTAATCGGAATTACTGGGCGTAAAGCGCACGTAGGCGGTTCTGTAAGTGGGATGTGAAACCCCCGGGCTTAACCTGGGAATTGCATACCAGACTGCAAAGCTAGAGTATGAGAGAGGGTGGTGGAATTTCCGGTGTAGCGGTGAAATGCGTAGAGATCGGAAGGAACATCAGTGGCGAAGGCGGCCACCTGGCTTAATACTGACGCTGAGGTGCGAAAGCGTGGGGATCAAACAGGATTAGAAACCCCAGTAGTCCA
OTU-009	D_0__Bacteria, D_1__Bacteroidetes, D_2__Bacteroidia, D_3__Cytophagales, D_4__Cyclobacteriaceae, D_5__Ekhidna, Ambiguous_taxa	3354	32.5	37.8333	2.5	485.667	0	0	1	14	0	0	2091	638	0	0	185	0	3	3	2	69	113	40	0	2	0	57	73	63	ACGTGCCAGCAGCCGCGGTAATACGTAGGATGCAAGCGTTGTCCGGAATTATTGGGTTTAAAGGGTGTGTAGGTTGTTATATAAGTCAGCGGTGAAATACATTTGCTTAACAGATAGTAAGCCGTTGATACTGTATAGCTAGAGTGCGATATAGGTGGGCGGAATTTGTAATGTAGCGGTGAAATGCATAGATATTACAAGGAACGTCGATAGCGAAGGCAGCTCACTGTGTCTGCACTGACACTGAGACACGAAAGCGTGGGTATCGAACAGGATTAGAAACCCCAGTAGTCCA
OTU-010	D_0__Bacteria, D_1__Verrucomicrobia, D_2__Verrucomicrobiae, D_3__Pedosphaerales, D_4__Pedosphaeraceae, Ambiguous_taxa, Ambiguous_taxa	2934	0	0	489	0	0	0	914	740	0	1280	0	0	0	0	0	0	0	0	0	0	0	0	0	0	0	0	0	0	GTGCCAGCAGCCGCGGTAATACAGAGGTCCCAAGCGTTGTTCGGATTTACTGGGCGTAAAGGGTGCGTAGGCGGCGAGGAAAGTTTGAGGTGAAATCTCCAGGCTCAACTTGGAAAATGCCTTGAAGACTTCCCCGCTCGAGGGTCGTAGAGGAGACTGGAATTCTCGGTGTAGCAGTGAAATGCGTAGATATCGAGAGGAACACCAGTGGCGAAAGCGGGTCTCTGGACGACACCTGACGCTGAGGCACGAAAGCCAGGGGAGCAAACGGGATTAGAAACCCCTGTAGTCCGT
OTU-011	D_0__Bacteria, D_1__Proteobacteria, D_2__Gammaproteobacteria, D_3__Betaproteobacteriales, D_4__Burkholderiaceae, D_5__uncultured,	2431	246.833	164.5	0	0	0	0	0	0	0	0	0	0	0	0	0	0	84	264	222	89	183	108	121	280	182	163	354	381	CTAGTGCCAGCCGCCGCGGTAATACGTAGGGTGCAAGCGTTAATCGGAATTACTGGGCGTAAAGCGTGCGCAGGCGGTTGATTAAGTTTGATGTGAAATCCCCGGGCTTAACCTGGGAACTGCATTGAATACTGGTCAGCTAGAGTGTGTCAGAGGGGGGTAGAATTCCACGTGTAGCAGTGAAATGCGTAGAGATGTGGAGGAATACCGATGGCGAAGGCAGCCCCCTGGGATAACACTGACGCTCATGCACGAAAGCGTGGGGAGCAAACAGGATTAGATACCCTTGTAGTCCTAG
OTU-025	D_0__Bacteria, D_1__Proteobacteria, D_2__Gammaproteobacteria, D_3__Oceanospirillales, D_4__Halomonadaceae, D_5__HdN1, D_6__gamma proteobacterium HdN1	2216	96.8333	262	0	0	0	0	0	0	0	0	0	0	0	0	0	0	66	282	118	364	645	160	3	14	0	123	233	208	CTAGTGCCAGCCGCCGCGGTAATACGGAGGGTGCGAGCGTTAATCGGAATTACTGGGCGTAAAGCGCACGTAGGCGGTTCTGTAAGTGGGATGTGAAACCCCCGGGCTTAACCTGGGAATTGCATACCAGACTGCAAAGCTAGAGTATGAGAGAGGGTGGTGGAATTTCCGGTGTAGCGGTGAAATGCGTAGAGATCGGAAGGAACATCAGTGGCGAAGGCGGCCACCTGGCTTAATACTGACGCTGAGGTGCGAAAGCGTGGGGATCAAACAGGATTAGATACCCTGGTAGTCCTAG
OTU-041	D_0__Bacteria, D_1__Proteobacteria, D_2__Alphaproteobacteria, D_3__Sphingomonadales, D_4__Sphingomonadaceae, D_5__Ellin6055, D_6__metagenome	922	26	20	46.5	69.3333	26	4	62	79	12	96	125	198	4	7	80	2	9	6	6	18	7	25	58	30	29	22	6	11	CTAGTGCCAGCCGCCGCGGTAATACGGAGGGAGCTAGCGTTATTCGGAATTACTGGGCGTAAAGCGCACGTAGGCGGCTTTGCAAGTTAGAGGTGAAAGCCTGGAGCTCAACTCCAGAATTGCCTTTAAAACTGCATCGCTTGAATCCAGGAGAGGTGAGTGGAATTCCGAGTGTAGAGGTGAAATTCGTAGATATTCGGAAGAACACCAGTGGCGAAGGCGGCTCACTGGACTGGTATTGACGCTGAGGTGCGAAAGCGTGGGGAGCAAACAGGATTAGAAACCCTAGTAGTCCGT
OTU-042	D_0__Bacteria, D_1__Proteobacteria, D_2__Gammaproteobacteria, D_3__Aeromonadales, D_4__Aeromonadaceae, D_5__Aeromonas,	1608	2.66667	2.5	130.5	133.333	228	344	4	0	205	2	0	0	358	189	1	252	0	1	2	2	1	3	6	1	4	4	0	1	CTAGTGCCAGCCGCCGCGGTAATACGGAGGGTCCGAGCGTTAATCGGAATTACTGGGCGTAAAGCGCACGCAGGCGGTTGGATAAGTTAGATGTGAAAGCCCCGGGCTCAACCTGGGAATTGCATTTAAAACTGTCCAGCTAGAGTCTTGTAGAGGGGGGTAGAATTCCAGGTGTAGCGGTGAAATGCGTAGAGATCTGGAGGAATACCGGTGGCGAAGGCGGCCCCCTGGACAAAGACTGACGCTCATGCACGAAAGCGTGGGGAGCAAACAGGATTAGAAACCCCGGTAGTCCTAG
OTU-053	D_0__Bacteria, D_1__Proteobacteria, D_2__Gammaproteobacteria, , , ,	1239	3.5	1.5	103.167	98.6667	237	216	1	0	162	3	0	0	237	192	0	163	1	1	1	1	2	1	3	1	5	2	5	5	ACGTGCCAGCCGCCGCGGTAATACGGAGGGTGCAAGCGTTAATCGGAATTACTGGGCGTAAAGCGTGCGCAGGCGGTTTGTTAAGCGAGATGTGAAAGCCCCGGGCTCAACCTGGGAATTGCATTTAAAACTGTCCAGCTAGAGTCTTGTAGAGGGGGGTAGAATTCCAGGTGTAGCGGTGAAATGCGTAGAGATCTGGAGGAATACCGGTGGCGAAGGCGGCCCCCTGGACAAAGACTGACGCTCAGGKGCGAAAGCGTGGGGAGCAAACAGGATTAGAAACCCCAGTAGTCCA
OTU-054	D_0__Bacteria, D_1__Bacteroidetes, D_2__Bacteroidia, D_3__Cytophagales, D_4__Cyclobacteriaceae, D_5__uncultured, D_6__uncultured Bacteroidetes bacterium	791	113	43.1667	0	16.1667	0	0	0	0	0	0	38	32	1	0	26	0	1	0	0	0	1	14	244	220	172	12	24	6	ACGTGCCAGCCGCCGCGGTAATACGGAGGGTGCAAGCGTTGTCCGGATTTATTGGGTTTAAAGGGTGCGTAGGCGGTATAATAAGTCAGTGGTTAAAGGACATAGCTTAACTATGGAAATGCCATTGATACTGTTAAACTAGAGTATTGTAGAGGTTGGCGGAATTGGTAGTGTAGCGGTGAAATGCATAGATACTACCAGGAACACCGATTGCGAAGGCAGCTAACTGGACAAAAACTGACGCTGAGGCACGAAAGCATGGGTAGCAAACAGGATTAGATACCCCAGTAGTCCTAG
OTU-136	D_0__Bacteria, D_1__Proteobacteria, D_2__Gammaproteobacteria, D_3__Betaproteobacteriales, D_4__Burkholderiaceae, ,	1023	39.1667	107.5	4.33333	7.16667	0	2	9	7	0	8	12	14	0	0	16	1	124	120	177	95	101	102	50	63	36	24	36	26	CTAGTGCCAGCAGCCGCGGTAATACAGAGGGTGCAAGCGTTAATCGGAATTACTGGGCGTAAAGCGCGCGTAGGTGGTTCGTTAAGTTGGATGTGAAAGCCCCGGGCTCAACCTGGGAACTGCCTTTGTGACTGCATAGCTAGAGTACGGTAGAGGGGGATGGAATTCCGCGTGTAGCAGTGAAATGCGTAGATATGCGGAGGAACACCGATGGCGAAGGCAATCCCCTGGACCTGTACTGACGCTCATGCACGAAAGCGTGGGGAGCAAACAGGATTAGAAACCCGTGTAGTCCTAG
OTU-188	D_0__Bacteria, D_1__Proteobacteria, D_2__Gammaproteobacteria, , , ,	1568	18.6667	21.3333	132	90	9	16	367	281	4	115	105	219	5	15	194	2	15	26	18	29	21	15	19	18	21	28	10	16	CTAGTGCCAGCCGCCGCGGTAATACGGAGGGTGCAAGCGTTAATCGGAATTACTGGGCGTAAAGCGCACGCAGGCGGTTGGATAAGTTAGATGTGAAAGCCCCGGGCTCAACCTGGGAATTGCATTTAAAACTGTCCAGCTAGAGTCTTGTAGAGGGGGGTAGAATTCCAGGTGTAGCGGTGAAATGCGTAGAGATCTGGAGGAATACCGGTGGCGAAGGCGGCCCCCTGGACAGATACTGACACTCAGATGCGAAAGCGTGGGGAGCAAACAGGATTAGAAACCCGAGTAGTCCTAG
OTU-207	D_0__Bacteria, D_1__Proteobacteria, D_2__Gammaproteobacteria, D_3__Alteromonadales, D_4__Shewanellaceae, D_5__Shewanella, Ambiguous_taxa	1328	0.5	0.833333	111.667	108.333	213	278	0	0	179	0	0	0	268	171	0	211	0	3	1	0	0	1	0	1	0	0	2	0	ACGTGCCAGCAGCCGCGGTAATACGGAGGGTCCGAGCGTTAATCGGAATTACTGGGCGTAAAGCGTGCGCAGGCGGTTTGTTAAGCGAGATGTGAAAGCCCCGGGCTCAACCTGGGAATTGCATTTAAAACTGTCCAGCTAGAGTCTTGTAGAGGGGGGTAGAATTCCAGGTGTAGCGGTGAAATGCGTAGAGATCTGGAGGAATACCGGTGGCGAAGGCGGCCCCCTGGACAAAGACTGACGCTCAGGKGCGAAAGCGTGGGGAGCAAACAGGATTAGATACCCGTGTAGTCCGT
			#DIV/0!	#DIV/0!	#DIV/0!	#DIV/0!
			#DIV/0!	#DIV/0!	#DIV/0!	#DIV/0!
			#DIV/0!	#DIV/0!	#DIV/0!	#DIV/0!
			#DIV/0!	#DIV/0!	#DIV/0!	#DIV/0!
			#DIV/0!	#DIV/0!	#DIV/0!	#DIV/0!
			#DIV/0!	#DIV/0!	#DIV/0!	#DIV/0!
			#DIV/0!	#DIV/0!	#DIV/0!	#DIV/0!
			#DIV/0!	#DIV/0!	#DIV/0!	#DIV/0!
			#DIV/0!	#DIV/0!	#DIV/0!	#DIV/0!
			#DIV/0!	#DIV/0!	#DIV/0!	#DIV/0!
			#DIV/0!	#DIV/0!	#DIV/0!	#DIV/0!
			#DIV/0!	#DIV/0!	#DIV/0!	#DIV/0!
			#DIV/0!	#DIV/0!	#DIV/0!	#DIV/0!
			#DIV/0!	#DIV/0!	#DIV/0!	#DIV/0!
			#DIV/0!	#DIV/0!	#DIV/0!	#DIV/0!
			#DIV/0!	#DIV/0!	#DIV/0!	#DIV/0!
			#DIV/0!	#DIV/0!	#DIV/0!	#DIV/0!
			#DIV/0!	#DIV/0!	#DIV/0!	#DIV/0!
			#DIV/0!	#DIV/0!	#DIV/0!	#DIV/0!
			#DIV/0!	#DIV/0!	#DIV/0!	#DIV/0!
			#DIV/0!	#DIV/0!	#DIV/0!	#DIV/0!
			#DIV/0!	#DIV/0!	#DIV/0!	#DIV/0!
			#DIV/0!	#DIV/0!	#DIV/0!	#DIV/0!
			#DIV/0!	#DIV/0!	#DIV/0!	#DIV/0!
			#DIV/0!	#DIV/0!	#DIV/0!	#DIV/0!
			#DIV/0!	#DIV/0!	#DIV/0!	#DIV/0!
			#DIV/0!	#DIV/0!	#DIV/0!	#DIV/0!
			#DIV/0!	#DIV/0!	#DIV/0!	#DIV/0!
			#DIV/0!	#DIV/0!	#DIV/0!	#DIV/0!
			#DIV/0!	#DIV/0!	#DIV/0!	#DIV/0!
			#DIV/0!	#DIV/0!	#DIV/0!	#DIV/0!
			#DIV/0!	#DIV/0!	#DIV/0!	#DIV/0!
			#DIV/0!	#DIV/0!	#DIV/0!	#DIV/0!
			#DIV/0!	#DIV/0!	#DIV/0!	#DIV/0!
			#DIV/0!	#DIV/0!	#DIV/0!	#DIV/0!
			#DIV/0!	#DIV/0!	#DIV/0!	#DIV/0!
			#DIV/0!	#DIV/0!	#DIV/0!	#DIV/0!
			#DIV/0!	#DIV/0!	#DIV/0!	#DIV/0!
			#DIV/0!	#DIV/0!	#DIV/0!	#DIV/0!
			#DIV/0!	#DIV/0!	#DIV/0!	#DIV/0!
			#DIV/0!	#DIV/0!	#DIV/0!	#DIV/0!
			#DIV/0!	#DIV/0!	#DIV/0!	#DIV/0!
			#DIV/0!	#DIV/0!	#DIV/0!	#DIV/0!
			#DIV/0!	#DIV/0!	#DIV/0!	#DIV/0!
			#DIV/0!	#DIV/0!	#DIV/0!	#DIV/0!
			#DIV/0!	#DIV/0!	#DIV/0!	#DIV/0!
			#DIV/0!	#DIV/0!	#DIV/0!	#DIV/0!
			#DIV/0!	#DIV/0!	#DIV/0!	#DIV/0!
			#DIV/0!	#DIV/0!	#DIV/0!	#DIV/0!
			#DIV/0!	#DIV/0!	#DIV/0!	#DIV/0!
			#DIV/0!	#DIV/0!	#DIV/0!	#DIV/0!
			#DIV/0!	#DIV/0!	#DIV/0!	#DIV/0!
			#DIV/0!	#DIV/0!	#DIV/0!	#DIV/0!
			#DIV/0!	#DIV/0!	#DIV/0!	#DIV/0!
			#DIV/0!	#DIV/0!	#DIV/0!	#DIV/0!
			#DIV/0!	#DIV/0!	#DIV/0!	#DIV/0!
			#DIV/0!	#DIV/0!	#DIV/0!	#DIV/0!
			#DIV/0!	#DIV/0!	#DIV/0!	#DIV/0!
			#DIV/0!	#DIV/0!	#DIV/0!	#DIV/0!
			#DIV/0!	#DIV/0!	#DIV/0!	#DIV/0!
			#DIV/0!	#DIV/0!	#DIV/0!	#DIV/0!
			#DIV/0!	#DIV/0!	#DIV/0!	#DIV/0!
			#DIV/0!	#DIV/0!	#DIV/0!	#DIV/0!
			#DIV/0!	#DIV/0!	#DIV/0!	#DIV/0!
			#DIV/0!	#DIV/0!	#DIV/0!	#DIV/0!
			#DIV/0!	#DIV/0!	#DIV/0!	#DIV/0!
			#DIV/0!	#DIV/0!	#DIV/0!	#DIV/0!
			#DIV/0!	#DIV/0!	#DIV/0!	#DIV/0!
			#DIV/0!	#DIV/0!	#DIV/0!	#DIV/0!
			#DIV/0!	#DIV/0!	#DIV/0!	#DIV/0!
			#DIV/0!	#DIV/0!	#DIV/0!	#DIV/0!
			#DIV/0!	#DIV/0!	#DIV/0!	#DIV/0!
			#DIV/0!	#DIV/0!	#DIV/0!	#DIV/0!
			#DIV/0!	#DIV/0!	#DIV/0!	#DIV/0!
			#DIV/0!	#DIV/0!	#DIV/0!	#DIV/0!
			#DIV/0!	#DIV/0!	#DIV/0!	#DIV/0!
			#DIV/0!	#DIV/0!	#DIV/0!	#DIV/0!
			#DIV/0!	#DIV/0!	#DIV/0!	#DIV/0!
			#DIV/0!	#DIV/0!	#DIV/0!	#DIV/0!
			#DIV/0!	#DIV/0!	#DIV/0!	#DIV/0!
			#DIV/0!	#DIV/0!	#DIV/0!	#DIV/0!
			#DIV/0!	#DIV/0!	#DIV/0!	#DIV/0!
			#DIV/0!	#DIV/0!	#DIV/0!	#DIV/0!
			#DIV/0!	#DIV/0!	#DIV/0!	#DIV/0!
			#DIV/0!	#DIV/0!	#DIV/0!	#DIV/0!
			#DIV/0!	#DIV/0!	#DIV/0!	#DIV/0!
			#DIV/0!	#DIV/0!	#DIV/0!	#DIV/0!
			#DIV/0!	#DIV/0!	#DIV/0!	#DIV/0!
			#DIV/0!	#DIV/0!	#DIV/0!	#DIV/0!
			#DIV/0!	#DIV/0!	#DIV/0!	#DIV/0!
			#DIV/0!	#DIV/0!	#DIV/0!	#DIV/0!
			#DIV/0!	#DIV/0!	#DIV/0!	#DIV/0!
			#DIV/0!	#DIV/0!	#DIV/0!	#DIV/0!
			#DIV/0!	#DIV/0!	#DIV/0!	#DIV/0!
			#DIV/0!	#DIV/0!	#DIV/0!	#DIV/0!
			#DIV/0!	#DIV/0!	#DIV/0!	#DIV/0!
			#DIV/0!	#DIV/0!	#DIV/0!	#DIV/0!
			#DIV/0!	#DIV/0!	#DIV/0!	#DIV/0!
			#DIV/0!	#DIV/0!	#DIV/0!	#DIV/0!
			#DIV/0!	#DIV/0!	#DIV/0!	#DIV/0!
			#DIV/0!	#DIV/0!	#DIV/0!	#DIV/0!
			#DIV/0!	#DIV/0!	#DIV/0!	#DIV/0!
			#DIV/0!	#DIV/0!	#DIV/0!	#DIV/0!
			#DIV/0!	#DIV/0!	#DIV/0!	#DIV/0!
			#DIV/0!	#DIV/0!	#DIV/0!	#DIV/0!
			#DIV/0!	#DIV/0!	#DIV/0!	#DIV/0!
			#DIV/0!	#DIV/0!	#DIV/0!	#DIV/0!
			#DIV/0!	#DIV/0!	#DIV/0!	#DIV/0!
			#DIV/0!	#DIV/0!	#DIV/0!	#DIV/0!
			#DIV/0!	#DIV/0!	#DIV/0!	#DIV/0!
			#DIV/0!	#DIV/0!	#DIV/0!	#DIV/0!
			#DIV/0!	#DIV/0!	#DIV/0!	#DIV/0!
			#DIV/0!	#DIV/0!	#DIV/0!	#DIV/0!
			#DIV/0!	#DIV/0!	#DIV/0!	#DIV/0!
			#DIV/0!	#DIV/0!	#DIV/0!	#DIV/0!
			#DIV/0!	#DIV/0!	#DIV/0!	#DIV/0!
			#DIV/0!	#DIV/0!	#DIV/0!	#DIV/0!
			#DIV/0!	#DIV/0!	#DIV/0!	#DIV/0!
			#DIV/0!	#DIV/0!	#DIV/0!	#DIV/0!
			#DIV/0!	#DIV/0!	#DIV/0!	#DIV/0!
			#DIV/0!	#DIV/0!	#DIV/0!	#DIV/0!
			#DIV/0!	#DIV/0!	#DIV/0!	#DIV/0!
			#DIV/0!	#DIV/0!	#DIV/0!	#DIV/0!
			#DIV/0!	#DIV/0!	#DIV/0!	#DIV/0!
			#DIV/0!	#DIV/0!	#DIV/0!	#DIV/0!
			#DIV/0!	#DIV/0!	#DIV/0!	#DIV/0!
			#DIV/0!	#DIV/0!	#DIV/0!	#DIV/0!
			#DIV/0!	#DIV/0!	#DIV/0!	#DIV/0!
			#DIV/0!	#DIV/0!	#DIV/0!	#DIV/0!
			#DIV/0!	#DIV/0!	#DIV/0!	#DIV/0!
			#DIV/0!	#DIV/0!	#DIV/0!	#DIV/0!
			#DIV/0!	#DIV/0!	#DIV/0!	#DIV/0!
			#DIV/0!	#DIV/0!	#DIV/0!	#DIV/0!
			#DIV/0!	#DIV/0!	#DIV/0!	#DIV/0!
			#DIV/0!	#DIV/0!	#DIV/0!	#DIV/0!
			#DIV/0!	#DIV/0!	#DIV/0!	#DIV/0!
			#DIV/0!	#DIV/0!	#DIV/0!	#DIV/0!
			#DIV/0!	#DIV/0!	#DIV/0!	#DIV/0!
			#DIV/0!	#DIV/0!	#DIV/0!	#DIV/0!
			#DIV/0!	#DIV/0!	#DIV/0!	#DIV/0!
			#DIV/0!	#DIV/0!	#DIV/0!	#DIV/0!
			#DIV/0!	#DIV/0!	#DIV/0!	#DIV/0!
			#DIV/0!	#DIV/0!	#DIV/0!	#DIV/0!
			#DIV/0!	#DIV/0!	#DIV/0!	#DIV/0!
			#DIV/0!	#DIV/0!	#DIV/0!	#DIV/0!
			#DIV/0!	#DIV/0!	#DIV/0!	#DIV/0!
			#DIV/0!	#DIV/0!	#DIV/0!	#DIV/0!
			#DIV/0!	#DIV/0!	#DIV/0!	#DIV/0!
			#DIV/0!	#DIV/0!	#DIV/0!	#DIV/0!
			#DIV/0!	#DIV/0!	#DIV/0!	#DIV/0!
			#DIV/0!	#DIV/0!	#DIV/0!	#DIV/0!
			#DIV/0!	#DIV/0!	#DIV/0!	#DIV/0!
			#DIV/0!	#DIV/0!	#DIV/0!	#DIV/0!
			#DIV/0!	#DIV/0!	#DIV/0!	#DIV/0!
			#DIV/0!	#DIV/0!	#DIV/0!	#DIV/0!
			#DIV/0!	#DIV/0!	#DIV/0!	#DIV/0!
			#DIV/0!	#DIV/0!	#DIV/0!	#DIV/0!
			#DIV/0!	#DIV/0!	#DIV/0!	#DIV/0!
			#DIV/0!	#DIV/0!	#DIV/0!	#DIV/0!
			#DIV/0!	#DIV/0!	#DIV/0!	#DIV/0!
			#DIV/0!	#DIV/0!	#DIV/0!	#DIV/0!
			#DIV/0!	#DIV/0!	#DIV/0!	#DIV/0!
			#DIV/0!	#DIV/0!	#DIV/0!	#DIV/0!
			#DIV/0!	#DIV/0!	#DIV/0!	#DIV/0!
			#DIV/0!	#DIV/0!	#DIV/0!	#DIV/0!
			#DIV/0!	#DIV/0!	#DIV/0!	#DIV/0!
			#DIV/0!	#DIV/0!	#DIV/0!	#DIV/0!
			#DIV/0!	#DIV/0!	#DIV/0!	#DIV/0!
			#DIV/0!	#DIV/0!	#DIV/0!	#DIV/0!
			#DIV/0!	#DIV/0!	#DIV/0!	#DIV/0!
			#DIV/0!	#DIV/0!	#DIV/0!	#DIV/0!
			#DIV/0!	#DIV/0!	#DIV/0!	#DIV/0!
			#DIV/0!	#DIV/0!	#DIV/0!	#DIV/0!
			#DIV/0!	#DIV/0!	#DIV/0!	#DIV/0!
			#DIV/0!	#DIV/0!	#DIV/0!	#DIV/0!
			#DIV/0!	#DIV/0!	#DIV/0!	#DIV/0!
			#DIV/0!	#DIV/0!	#DIV/0!	#DIV/0!
			#DIV/0!	#DIV/0!	#DIV/0!	#DIV/0!
			#DIV/0!	#DIV/0!	#DIV/0!	#DIV/0!
			#DIV/0!	#DIV/0!	#DIV/0!	#DIV/0!
			#DIV/0!	#DIV/0!	#DIV/0!	#DIV/0!
			#DIV/0!	#DIV/0!	#DIV/0!	#DIV/0!
			#DIV/0!	#DIV/0!	#DIV/0!	#DIV/0!
			#DIV/0!	#DIV/0!	#DIV/0!	#DIV/0!
			#DIV/0!	#DIV/0!	#DIV/0!	#DIV/0!
			#DIV/0!	#DIV/0!	#DIV/0!	#DIV/0!
			#DIV/0!	#DIV/0!	#DIV/0!	#DIV/0!
			#DIV/0!	#DIV/0!	#DIV/0!	#DIV/0!
			#DIV/0!	#DIV/0!	#DIV/0!	#DIV/0!
			#DIV/0!	#DIV/0!	#DIV/0!	#DIV/0!
			#DIV/0!	#DIV/0!	#DIV/0!	#DIV/0!
			#DIV/0!	#DIV/0!	#DIV/0!	#DIV/0!
			#DIV/0!	#DIV/0!	#DIV/0!	#DIV/0!
			#DIV/0!	#DIV/0!	#DIV/0!	#DIV/0!
			#DIV/0!	#DIV/0!	#DIV/0!	#DIV/0!
			#DIV/0!	#DIV/0!	#DIV/0!	#DIV/0!
			#DIV/0!	#DIV/0!	#DIV/0!	#DIV/0!
			#DIV/0!	#DIV/0!	#DIV/0!	#DIV/0!
			#DIV/0!	#DIV/0!	#DIV/0!	#DIV/0!
			#DIV/0!	#DIV/0!	#DIV/0!	#DIV/0!
			#DIV/0!	#DIV/0!	#DIV/0!	#DIV/0!
			#DIV/0!	#DIV/0!	#DIV/0!	#DIV/0!
			#DIV/0!	#DIV/0!	#DIV/0!	#DIV/0!
			#DIV/0!	#DIV/0!	#DIV/0!	#DIV/0!
			#DIV/0!	#DIV/0!	#DIV/0!	#DIV/0!
			#DIV/0!	#DIV/0!	#DIV/0!	#DIV/0!
			#DIV/0!	#DIV/0!	#DIV/0!	#DIV/0!
			#DIV/0!	#DIV/0!	#DIV/0!	#DIV/0!
			#DIV/0!	#DIV/0!	#DIV/0!	#DIV/0!
			#DIV/0!	#DIV/0!	#DIV/0!	#DIV/0!
			#DIV/0!	#DIV/0!	#DIV/0!	#DIV/0!
			#DIV/0!	#DIV/0!	#DIV/0!	#DIV/0!
			#DIV/0!	#DIV/0!	#DIV/0!	#DIV/0!
			#DIV/0!	#DIV/0!	#DIV/0!	#DIV/0!
			#DIV/0!	#DIV/0!	#DIV/0!	#DIV/0!
			#DIV/0!	#DIV/0!	#DIV/0!	#DIV/0!
			#DIV/0!	#DIV/0!	#DIV/0!	#DIV/0!
			#DIV/0!	#DIV/0!	#DIV/0!	#DIV/0!
			#DIV/0!	#DIV/0!	#DIV/0!	#DIV/0!
			#DIV/0!	#DIV/0!	#DIV/0!	#DIV/0!
			#DIV/0!	#DIV/0!	#DIV/0!	#DIV/0!
			#DIV/0!	#DIV/0!	#DIV/0!	#DIV/0!
			#DIV/0!	#DIV/0!	#DIV/0!	#DIV/0!
			#DIV/0!	#DIV/0!	#DIV/0!	#DIV/0!
			#DIV/0!	#DIV/0!	#DIV/0!	#DIV/0!
			#DIV/0!	#DIV/0!	#DIV/0!	#DIV/0!
			#DIV/0!	#DIV/0!	#DIV/0!	#DIV/0!
			#DIV/0!	#DIV/0!	#DIV/0!	#DIV/0!
			#DIV/0!	#DIV/0!	#DIV/0!	#DIV/0!
			#DIV/0!	#DIV/0!	#DIV/0!	#DIV/0!
			#DIV/0!	#DIV/0!	#DIV/0!	#DIV/0!
			#DIV/0!	#DIV/0!	#DIV/0!	#DIV/0!
			#DIV/0!	#DIV/0!	#DIV/0!	#DIV/0!
			#DIV/0!	#DIV/0!	#DIV/0!	#DIV/0!
			#DIV/0!	#DIV/0!	#DIV/0!	#DIV/0!
			#DIV/0!	#DIV/0!	#DIV/0!	#DIV/0!
			#DIV/0!	#DIV/0!	#DIV/0!	#DIV/0!
			#DIV/0!	#DIV/0!	#DIV/0!	#DIV/0!
			#DIV/0!	#DIV/0!	#DIV/0!	#DIV/0!
			#DIV/0!	#DIV/0!	#DIV/0!	#DIV/0!
			#DIV/0!	#DIV/0!	#DIV/0!	#DIV/0!
			#DIV/0!	#DIV/0!	#DIV/0!	#DIV/0!
			#DIV/0!	#DIV/0!	#DIV/0!	#DIV/0!
			#DIV/0!	#DIV/0!	#DIV/0!	#DIV/0!
			#DIV/0!	#DIV/0!	#DIV/0!	#DIV/0!
			#DIV/0!	#DIV/0!	#DIV/0!	#DIV/0!
			#DIV/0!	#DIV/0!	#DIV/0!	#DIV/0!
			#DIV/0!	#DIV/0!	#DIV/0!	#DIV/0!
			#DIV/0!	#DIV/0!	#DIV/0!	#DIV/0!
			#DIV/0!	#DIV/0!	#DIV/0!	#DIV/0!
			#DIV/0!	#DIV/0!	#DIV/0!	#DIV/0!
			#DIV/0!	#DIV/0!	#DIV/0!	#DIV/0!
			#DIV/0!	#DIV/0!	#DIV/0!	#DIV/0!
			#DIV/0!	#DIV/0!	#DIV/0!	#DIV/0!
			#DIV/0!	#DIV/0!	#DIV/0!	#DIV/0!
			#DIV/0!	#DIV/0!	#DIV/0!	#DIV/0!
			#DIV/0!	#DIV/0!	#DIV/0!	#DIV/0!
			#DIV/0!	#DIV/0!	#DIV/0!	#DIV/0!
			#DIV/0!	#DIV/0!	#DIV/0!	#DIV/0!
			#DIV/0!	#DIV/0!	#DIV/0!	#DIV/0!
			#DIV/0!	#DIV/0!	#DIV/0!	#DIV/0!
			#DIV/0!	#DIV/0!	#DIV/0!	#DIV/0!
			#DIV/0!	#DIV/0!	#DIV/0!	#DIV/0!
			#DIV/0!	#DIV/0!	#DIV/0!	#DIV/0!
			#DIV/0!	#DIV/0!	#DIV/0!	#DIV/0!
			#DIV/0!	#DIV/0!	#DIV/0!	#DIV/0!
			#DIV/0!	#DIV/0!	#DIV/0!	#DIV/0!
			#DIV/0!	#DIV/0!	#DIV/0!	#DIV/0!
			#DIV/0!	#DIV/0!	#DIV/0!	#DIV/0!
			#DIV/0!	#DIV/0!	#DIV/0!	#DIV/0!
			#DIV/0!	#DIV/0!	#DIV/0!	#DIV/0!
			#DIV/0!	#DIV/0!	#DIV/0!	#DIV/0!
			#DIV/0!	#DIV/0!	#DIV/0!	#DIV/0!
			#DIV/0!	#DIV/0!	#DIV/0!	#DIV/0!
			#DIV/0!	#DIV/0!	#DIV/0!	#DIV/0!
			#DIV/0!	#DIV/0!	#DIV/0!	#DIV/0!
			#DIV/0!	#DIV/0!	#DIV/0!	#DIV/0!
			#DIV/0!	#DIV/0!	#DIV/0!	#DIV/0!
			#DIV/0!	#DIV/0!	#DIV/0!	#DIV/0!
			#DIV/0!	#DIV/0!	#DIV/0!	#DIV/0!
			#DIV/0!	#DIV/0!	#DIV/0!	#DIV/0!
			#DIV/0!	#DIV/0!	#DIV/0!	#DIV/0!
			#DIV/0!	#DIV/0!	#DIV/0!	#DIV/0!
			#DIV/0!	#DIV/0!	#DIV/0!	#DIV/0!
			#DIV/0!	#DIV/0!	#DIV/0!	#DIV/0!
			#DIV/0!	#DIV/0!	#DIV/0!	#DIV/0!
			#DIV/0!	#DIV/0!	#DIV/0!	#DIV/0!
			#DIV/0!	#DIV/0!	#DIV/0!	#DIV/0!
			#DIV/0!	#DIV/0!	#DIV/0!	#DIV/0!
			#DIV/0!	#DIV/0!	#DIV/0!	#DIV/0!
			#DIV/0!	#DIV/0!	#DIV/0!	#DIV/0!
			#DIV/0!	#DIV/0!	#DIV/0!	#DIV/0!
			#DIV/0!	#DIV/0!	#DIV/0!	#DIV/0!
			#DIV/0!	#DIV/0!	#DIV/0!	#DIV/0!
			#DIV/0!	#DIV/0!	#DIV/0!	#DIV/0!
			#DIV/0!	#DIV/0!	#DIV/0!	#DIV/0!
			#DIV/0!	#DIV/0!	#DIV/0!	#DIV/0!
			#DIV/0!	#DIV/0!	#DIV/0!	#DIV/0!
			#DIV/0!	#DIV/0!	#DIV/0!	#DIV/0!
			#DIV/0!	#DIV/0!	#DIV/0!	#DIV/0!
			#DIV/0!	#DIV/0!	#DIV/0!	#DIV/0!
			#DIV/0!	#DIV/0!	#DIV/0!	#DIV/0!
			#DIV/0!	#DIV/0!	#DIV/0!	#DIV/0!
			#DIV/0!	#DIV/0!	#DIV/0!	#DIV/0!
			#DIV/0!	#DIV/0!	#DIV/0!	#DIV/0!
			#DIV/0!	#DIV/0!	#DIV/0!	#DIV/0!
			#DIV/0!	#DIV/0!	#DIV/0!	#DIV/0!
			#DIV/0!	#DIV/0!	#DIV/0!	#DIV/0!
			#DIV/0!	#DIV/0!	#DIV/0!	#DIV/0!
			#DIV/0!	#DIV/0!	#DIV/0!	#DIV/0!
			#DIV/0!	#DIV/0!	#DIV/0!	#DIV/0!
			#DIV/0!	#DIV/0!	#DIV/0!	#DIV/0!
			#DIV/0!	#DIV/0!	#DIV/0!	#DIV/0!
			#DIV/0!	#DIV/0!	#DIV/0!	#DIV/0!
			#DIV/0!	#DIV/0!	#DIV/0!	#DIV/0!
			#DIV/0!	#DIV/0!	#DIV/0!	#DIV/0!
			#DIV/0!	#DIV/0!	#DIV/0!	#DIV/0!
			#DIV/0!	#DIV/0!	#DIV/0!	#DIV/0!
			#DIV/0!	#DIV/0!	#DIV/0!	#DIV/0!
			#DIV/0!	#DIV/0!	#DIV/0!	#DIV/0!
			#DIV/0!	#DIV/0!	#DIV/0!	#DIV/0!
			#DIV/0!	#DIV/0!	#DIV/0!	#DIV/0!
			#DIV/0!	#DIV/0!	#DIV/0!	#DIV/0!
			#DIV/0!	#DIV/0!	#DIV/0!	#DIV/0!
			#DIV/0!	#DIV/0!	#DIV/0!	#DIV/0!
			#DIV/0!	#DIV/0!	#DIV/0!	#DIV/0!
			#DIV/0!	#DIV/0!	#DIV/0!	#DIV/0!
			#DIV/0!	#DIV/0!	#DIV/0!	#DIV/0!
			#DIV/0!	#DIV/0!	#DIV/0!	#DIV/0!
			#DIV/0!	#DIV/0!	#DIV/0!	#DIV/0!
			#DIV/0!	#DIV/0!	#DIV/0!	#DIV/0!
			#DIV/0!	#DIV/0!	#DIV/0!	#DIV/0!
			#DIV/0!	#DIV/0!	#DIV/0!	#DIV/0!
			#DIV/0!	#DIV/0!	#DIV/0!	#DIV/0!
			#DIV/0!	#DIV/0!	#DIV/0!	#DIV/0!
			#DIV/0!	#DIV/0!	#DIV/0!	#DIV/0!
			#DIV/0!	#DIV/0!	#DIV/0!	#DIV/0!
			#DIV/0!	#DIV/0!	#DIV/0!	#DIV/0!
			#DIV/0!	#DIV/0!	#DIV/0!	#DIV/0!
			#DIV/0!	#DIV/0!	#DIV/0!	#DIV/0!
			#DIV/0!	#DIV/0!	#DIV/0!	#DIV/0!
			#DIV/0!	#DIV/0!	#DIV/0!	#DIV/0!
			#DIV/0!	#DIV/0!	#DIV/0!	#DIV/0!
			#DIV/0!	#DIV/0!	#DIV/0!	#DIV/0!
			#DIV/0!	#DIV/0!	#DIV/0!	#DIV/0!
			#DIV/0!	#DIV/0!	#DIV/0!	#DIV/0!
			#DIV/0!	#DIV/0!	#DIV/0!	#DIV/0!
			#DIV/0!	#DIV/0!	#DIV/0!	#DIV/0!
			#DIV/0!	#DIV/0!	#DIV/0!	#DIV/0!
			#DIV/0!	#DIV/0!	#DIV/0!	#DIV/0!
			#DIV/0!	#DIV/0!	#DIV/0!	#DIV/0!
			#DIV/0!	#DIV/0!	#DIV/0!	#DIV/0!
			#DIV/0!	#DIV/0!	#DIV/0!	#DIV/0!
			#DIV/0!	#DIV/0!	#DIV/0!	#DIV/0!
			#DIV/0!	#DIV/0!	#DIV/0!	#DIV/0!
			#DIV/0!	#DIV/0!	#DIV/0!	#DIV/0!
			#DIV/0!	#DIV/0!	#DIV/0!	#DIV/0!
			#DIV/0!	#DIV/0!	#DIV/0!	#DIV/0!
			#DIV/0!	#DIV/0!	#DIV/0!	#DIV/0!
			#DIV/0!	#DIV/0!	#DIV/0!	#DIV/0!
			#DIV/0!	#DIV/0!	#DIV/0!	#DIV/0!
			#DIV/0!	#DIV/0!	#DIV/0!	#DIV/0!
			#DIV/0!	#DIV/0!	#DIV/0!	#DIV/0!
			#DIV/0!	#DIV/0!	#DIV/0!	#DIV/0!
			#DIV/0!	#DIV/0!	#DIV/0!	#DIV/0!
			#DIV/0!	#DIV/0!	#DIV/0!	#DIV/0!
			#DIV/0!	#DIV/0!	#DIV/0!	#DIV/0!
			#DIV/0!	#DIV/0!	#DIV/0!	#DIV/0!
			#DIV/0!	#DIV/0!	#DIV/0!	#DIV/0!
			#DIV/0!	#DIV/0!	#DIV/0!	#DIV/0!
			#DIV/0!	#DIV/0!	#DIV/0!	#DIV/0!
			#DIV/0!	#DIV/0!	#DIV/0!	#DIV/0!
			#DIV/0!	#DIV/0!	#DIV/0!	#DIV/0!
			#DIV/0!	#DIV/0!	#DIV/0!	#DIV/0!
			#DIV/0!	#DIV/0!	#DIV/0!	#DIV/0!
			#DIV/0!	#DIV/0!	#DIV/0!	#DIV/0!
			#DIV/0!	#DIV/0!	#DIV/0!	#DIV/0!
			#DIV/0!	#DIV/0!	#DIV/0!	#DIV/0!
			#DIV/0!	#DIV/0!	#DIV/0!	#DIV/0!
			#DIV/0!	#DIV/0!	#DIV/0!	#DIV/0!
			#DIV/0!	#DIV/0!	#DIV/0!	#DIV/0!
			#DIV/0!	#DIV/0!	#DIV/0!	#DIV/0!
			#DIV/0!	#DIV/0!	#DIV/0!	#DIV/0!
			#DIV/0!	#DIV/0!	#DIV/0!	#DIV/0!
			#DIV/0!	#DIV/0!	#DIV/0!	#DIV/0!
			#DIV/0!	#DIV/0!	#DIV/0!	#DIV/0!
			#DIV/0!	#DIV/0!	#DIV/0!	#DIV/0!
			#DIV/0!	#DIV/0!	#DIV/0!	#DIV/0!
			#DIV/0!	#DIV/0!	#DIV/0!	#DIV/0!
			#DIV/0!	#DIV/0!	#DIV/0!	#DIV/0!
			#DIV/0!	#DIV/0!	#DIV/0!	#DIV/0!
			#DIV/0!	#DIV/0!	#DIV/0!	#DIV/0!
			#DIV/0!	#DIV/0!	#DIV/0!	#DIV/0!
			#DIV/0!	#DIV/0!	#DIV/0!	#DIV/0!
			#DIV/0!	#DIV/0!	#DIV/0!	#DIV/0!
			#DIV/0!	#DIV/0!	#DIV/0!	#DIV/0!
			#DIV/0!	#DIV/0!	#DIV/0!	#DIV/0!
			#DIV/0!	#DIV/0!	#DIV/0!	#DIV/0!
			#DIV/0!	#DIV/0!	#DIV/0!	#DIV/0!
			#DIV/0!	#DIV/0!	#DIV/0!	#DIV/0!
			#DIV/0!	#DIV/0!	#DIV/0!	#DIV/0!
			#DIV/0!	#DIV/0!	#DIV/0!	#DIV/0!
			#DIV/0!	#DIV/0!	#DIV/0!	#DIV/0!
			#DIV/0!	#DIV/0!	#DIV/0!	#DIV/0!
			#DIV/0!	#DIV/0!	#DIV/0!	#DIV/0!
			#DIV/0!	#DIV/0!	#DIV/0!	#DIV/0!
			#DIV/0!	#DIV/0!	#DIV/0!	#DIV/0!
			#DIV/0!	#DIV/0!	#DIV/0!	#DIV/0!
			#DIV/0!	#DIV/0!	#DIV/0!	#DIV/0!
			#DIV/0!	#DIV/0!	#DIV/0!	#DIV/0!
			#DIV/0!	#DIV/0!	#DIV/0!	#DIV/0!
			#DIV/0!	#DIV/0!	#DIV/0!	#DIV/0!
			#DIV/0!	#DIV/0!	#DIV/0!	#DIV/0!
			#DIV/0!	#DIV/0!	#DIV/0!	#DIV/0!
			#DIV/0!	#DIV/0!	#DIV/0!	#DIV/0!
			#DIV/0!	#DIV/0!	#DIV/0!	#DIV/0!
			#DIV/0!	#DIV/0!	#DIV/0!	#DIV/0!
			#DIV/0!	#DIV/0!	#DIV/0!	#DIV/0!
			#DIV/0!	#DIV/0!	#DIV/0!	#DIV/0!
			#DIV/0!	#DIV/0!	#DIV/0!	#DIV/0!
			#DIV/0!	#DIV/0!	#DIV/0!	#DIV/0!
			#DIV/0!	#DIV/0!	#DIV/0!	#DIV/0!
			#DIV/0!	#DIV/0!	#DIV/0!	#DIV/0!
			#DIV/0!	#DIV/0!	#DIV/0!	#DIV/0!
			#DIV/0!	#DIV/0!	#DIV/0!	#DIV/0!
			#DIV/0!	#DIV/0!	#DIV/0!	#DIV/0!
			#DIV/0!	#DIV/0!	#DIV/0!	#DIV/0!
			#DIV/0!	#DIV/0!	#DIV/0!	#DIV/0!
			#DIV/0!	#DIV/0!	#DIV/0!	#DIV/0!
			#DIV/0!	#DIV/0!	#DIV/0!	#DIV/0!
			#DIV/0!	#DIV/0!	#DIV/0!	#DIV/0!
			#DIV/0!	#DIV/0!	#DIV/0!	#DIV/0!
			#DIV/0!	#DIV/0!	#DIV/0!	#DIV/0!
			#DIV/0!	#DIV/0!	#DIV/0!	#DIV/0!
			#DIV/0!	#DIV/0!	#DIV/0!	#DIV/0!
			#DIV/0!	#DIV/0!	#DIV/0!	#DIV/0!
			#DIV/0!	#DIV/0!	#DIV/0!	#DIV/0!
			#DIV/0!	#DIV/0!	#DIV/0!	#DIV/0!
			#DIV/0!	#DIV/0!	#DIV/0!	#DIV/0!
			#DIV/0!	#DIV/0!	#DIV/0!	#DIV/0!
			#DIV/0!	#DIV/0!	#DIV/0!	#DIV/0!
			#DIV/0!	#DIV/0!	#DIV/0!	#DIV/0!
			#DIV/0!	#DIV/0!	#DIV/0!	#DIV/0!
			#DIV/0!	#DIV/0!	#DIV/0!	#DIV/0!
			#DIV/0!	#DIV/0!	#DIV/0!	#DIV/0!
			#DIV/0!	#DIV/0!	#DIV/0!	#DIV/0!
			#DIV/0!	#DIV/0!	#DIV/0!	#DIV/0!
			#DIV/0!	#DIV/0!	#DIV/0!	#DIV/0!
			#DIV/0!	#DIV/0!	#DIV/0!	#DIV/0!
			#DIV/0!	#DIV/0!	#DIV/0!	#DIV/0!
			#DIV/0!	#DIV/0!	#DIV/0!	#DIV/0!
			#DIV/0!	#DIV/0!	#DIV/0!	#DIV/0!
			#DIV/0!	#DIV/0!	#DIV/0!	#DIV/0!
			#DIV/0!	#DIV/0!	#DIV/0!	#DIV/0!
			#DIV/0!	#DIV/0!	#DIV/0!	#DIV/0!
			#DIV/0!	#DIV/0!	#DIV/0!	#DIV/0!
			#DIV/0!	#DIV/0!	#DIV/0!	#DIV/0!
			#DIV/0!	#DIV/0!	#DIV/0!	#DIV/0!
			#DIV/0!	#DIV/0!	#DIV/0!	#DIV/0!
			#DIV/0!	#DIV/0!	#DIV/0!	#DIV/0!
			#DIV/0!	#DIV/0!	#DIV/0!	#DIV/0!
			#DIV/0!	#DIV/0!	#DIV/0!	#DIV/0!
			#DIV/0!	#DIV/0!	#DIV/0!	#DIV/0!
			#DIV/0!	#DIV/0!	#DIV/0!	#DIV/0!
			#DIV/0!	#DIV/0!	#DIV/0!	#DIV/0!
			#DIV/0!	#DIV/0!	#DIV/0!	#DIV/0!
			#DIV/0!	#DIV/0!	#DIV/0!	#DIV/0!
			#DIV/0!	#DIV/0!	#DIV/0!	#DIV/0!
			#DIV/0!	#DIV/0!	#DIV/0!	#DIV/0!
			#DIV/0!	#DIV/0!	#DIV/0!	#DIV/0!
			#DIV/0!	#DIV/0!	#DIV/0!	#DIV/0!
			#DIV/0!	#DIV/0!	#DIV/0!	#DIV/0!
			#DIV/0!	#DIV/0!	#DIV/0!	#DIV/0!
			#DIV/0!	#DIV/0!	#DIV/0!	#DIV/0!
			#DIV/0!	#DIV/0!	#DIV/0!	#DIV/0!
			#DIV/0!	#DIV/0!	#DIV/0!	#DIV/0!
			#DIV/0!	#DIV/0!	#DIV/0!	#DIV/0!
			#DIV/0!	#DIV/0!	#DIV/0!	#DIV/0!
			#DIV/0!	#DIV/0!	#DIV/0!	#DIV/0!
			#DIV/0!	#DIV/0!	#DIV/0!	#DIV/0!
			#DIV/0!	#DIV/0!	#DIV/0!	#DIV/0!
			#DIV/0!	#DIV/0!	#DIV/0!	#DIV/0!
			#DIV/0!	#DIV/0!	#DIV/0!	#DIV/0!
			#DIV/0!	#DIV/0!	#DIV/0!	#DIV/0!
			#DIV/0!	#DIV/0!	#DIV/0!	#DIV/0!
			#DIV/0!	#DIV/0!	#DIV/0!	#DIV/0!
			#DIV/0!	#DIV/0!	#DIV/0!	#DIV/0!
			#DIV/0!	#DIV/0!	#DIV/0!	#DIV/0!
			#DIV/0!	#DIV/0!	#DIV/0!	#DIV/0!
			#DIV/0!	#DIV/0!	#DIV/0!	#DIV/0!
			#DIV/0!	#DIV/0!	#DIV/0!	#DIV/0!
			#DIV/0!	#DIV/0!	#DIV/0!	#DIV/0!
			#DIV/0!	#DIV/0!	#DIV/0!	#DIV/0!
			#DIV/0!	#DIV/0!	#DIV/0!	#DIV/0!
			#DIV/0!	#DIV/0!	#DIV/0!	#DIV/0!
			#DIV/0!	#DIV/0!	#DIV/0!	#DIV/0!
			#DIV/0!	#DIV/0!	#DIV/0!	#DIV/0!
			#DIV/0!	#DIV/0!	#DIV/0!	#DIV/0!
			#DIV/0!	#DIV/0!	#DIV/0!	#DIV/0!
			#DIV/0!	#DIV/0!	#DIV/0!	#DIV/0!
			#DIV/0!	#DIV/0!	#DIV/0!	#DIV/0!
			#DIV/0!	#DIV/0!	#DIV/0!	#DIV/0!
			#DIV/0!	#DIV/0!	#DIV/0!	#DIV/0!
			#DIV/0!	#DIV/0!	#DIV/0!	#DIV/0!
			#DIV/0!	#DIV/0!	#DIV/0!	#DIV/0!
			#DIV/0!	#DIV/0!	#DIV/0!	#DIV/0!
			#DIV/0!	#DIV/0!	#DIV/0!	#DIV/0!
			#DIV/0!	#DIV/0!	#DIV/0!	#DIV/0!
			#DIV/0!	#DIV/0!	#DIV/0!	#DIV/0!
			#DIV/0!	#DIV/0!	#DIV/0!	#DIV/0!
			#DIV/0!	#DIV/0!	#DIV/0!	#DIV/0!
			#DIV/0!	#DIV/0!	#DIV/0!	#DIV/0!
			#DIV/0!	#DIV/0!	#DIV/0!	#DIV/0!
			#DIV/0!	#DIV/0!	#DIV/0!	#DIV/0!
			#DIV/0!	#DIV/0!	#DIV/0!	#DIV/0!
			#DIV/0!	#DIV/0!	#DIV/0!	#DIV/0!
			#DIV/0!	#DIV/0!	#DIV/0!	#DIV/0!
			#DIV/0!	#DIV/0!	#DIV/0!	#DIV/0!
			#DIV/0!	#DIV/0!	#DIV/0!	#DIV/0!
			#DIV/0!	#DIV/0!	#DIV/0!	#DIV/0!
			#DIV/0!	#DIV/0!	#DIV/0!	#DIV/0!
			#DIV/0!	#DIV/0!	#DIV/0!	#DIV/0!
			#DIV/0!	#DIV/0!	#DIV/0!	#DIV/0!
			#DIV/0!	#DIV/0!	#DIV/0!	#DIV/0!
			#DIV/0!	#DIV/0!	#DIV/0!	#DIV/0!
			#DIV/0!	#DIV/0!	#DIV/0!	#DIV/0!
			#DIV/0!	#DIV/0!	#DIV/0!	#DIV/0!
			#DIV/0!	#DIV/0!	#DIV/0!	#DIV/0!
			#DIV/0!	#DIV/0!	#DIV/0!	#DIV/0!
			#DIV/0!	#DIV/0!	#DIV/0!	#DIV/0!
			#DIV/0!	#DIV/0!	#DIV/0!	#DIV/0!
			#DIV/0!	#DIV/0!	#DIV/0!	#DIV/0!
			#DIV/0!	#DIV/0!	#DIV/0!	#DIV/0!
			#DIV/0!	#DIV/0!	#DIV/0!	#DIV/0!
			#DIV/0!	#DIV/0!	#DIV/0!	#DIV/0!
			#DIV/0!	#DIV/0!	#DIV/0!	#DIV/0!
			#DIV/0!	#DIV/0!	#DIV/0!	#DIV/0!
			#DIV/0!	#DIV/0!	#DIV/0!	#DIV/0!
			#DIV/0!	#DIV/0!	#DIV/0!	#DIV/0!
			#DIV/0!	#DIV/0!	#DIV/0!	#DIV/0!
			#DIV/0!	#DIV/0!	#DIV/0!	#DIV/0!
			#DIV/0!	#DIV/0!	#DIV/0!	#DIV/0!
			#DIV/0!	#DIV/0!	#DIV/0!	#DIV/0!
			#DIV/0!	#DIV/0!	#DIV/0!	#DIV/0!
			#DIV/0!	#DIV/0!	#DIV/0!	#DIV/0!
			#DIV/0!	#DIV/0!	#DIV/0!	#DIV/0!
			#DIV/0!	#DIV/0!	#DIV/0!	#DIV/0!
			#DIV/0!	#DIV/0!	#DIV/0!	#DIV/0!
			#DIV/0!	#DIV/0!	#DIV/0!	#DIV/0!
			#DIV/0!	#DIV/0!	#DIV/0!	#DIV/0!
			#DIV/0!	#DIV/0!	#DIV/0!	#DIV/0!
			#DIV/0!	#DIV/0!	#DIV/0!	#DIV/0!
			#DIV/0!	#DIV/0!	#DIV/0!	#DIV/0!
			#DIV/0!	#DIV/0!	#DIV/0!	#DIV/0!
			#DIV/0!	#DIV/0!	#DIV/0!	#DIV/0!
			#DIV/0!	#DIV/0!	#DIV/0!	#DIV/0!
			#DIV/0!	#DIV/0!	#DIV/0!	#DIV/0!
			#DIV/0!	#DIV/0!	#DIV/0!	#DIV/0!
			#DIV/0!	#DIV/0!	#DIV/0!	#DIV/0!
			#DIV/0!	#DIV/0!	#DIV/0!	#DIV/0!
			#DIV/0!	#DIV/0!	#DIV/0!	#DIV/0!
			#DIV/0!	#DIV/0!	#DIV/0!	#DIV/0!
			#DIV/0!	#DIV/0!	#DIV/0!	#DIV/0!
			#DIV/0!	#DIV/0!	#DIV/0!	#DIV/0!
			#DIV/0!	#DIV/0!	#DIV/0!	#DIV/0!
			#DIV/0!	#DIV/0!	#DIV/0!	#DIV/0!
			#DIV/0!	#DIV/0!	#DIV/0!	#DIV/0!
			#DIV/0!	#DIV/0!	#DIV/0!	#DIV/0!
			#DIV/0!	#DIV/0!	#DIV/0!	#DIV/0!
			#DIV/0!	#DIV/0!	#DIV/0!	#DIV/0!
			#DIV/0!	#DIV/0!	#DIV/0!	#DIV/0!
			#DIV/0!	#DIV/0!	#DIV/0!	#DIV/0!
			#DIV/0!	#DIV/0!	#DIV/0!	#DIV/0!
			#DIV/0!	#DIV/0!	#DIV/0!	#DIV/0!
			#DIV/0!	#DIV/0!	#DIV/0!	#DIV/0!
			#DIV/0!	#DIV/0!	#DIV/0!	#DIV/0!
			#DIV/0!	#DIV/0!	#DIV/0!	#DIV/0!
			#DIV/0!	#DIV/0!	#DIV/0!	#DIV/0!
			#DIV/0!	#DIV/0!	#DIV/0!	#DIV/0!
			#DIV/0!	#DIV/0!	#DIV/0!	#DIV/0!
			#DIV/0!	#DIV/0!	#DIV/0!	#DIV/0!
			#DIV/0!	#DIV/0!	#DIV/0!	#DIV/0!
			#DIV/0!	#DIV/0!	#DIV/0!	#DIV/0!
			#DIV/0!	#DIV/0!	#DIV/0!	#DIV/0!
			#DIV/0!	#DIV/0!	#DIV/0!	#DIV/0!
			#DIV/0!	#DIV/0!	#DIV/0!	#DIV/0!
			#DIV/0!	#DIV/0!	#DIV/0!	#DIV/0!
			#DIV/0!	#DIV/0!	#DIV/0!	#DIV/0!
			#DIV/0!	#DIV/0!	#DIV/0!	#DIV/0!
			#DIV/0!	#DIV/0!	#DIV/0!	#DIV/0!
			#DIV/0!	#DIV/0!	#DIV/0!	#DIV/0!
			#DIV/0!	#DIV/0!	#DIV/0!	#DIV/0!
			#DIV/0!	#DIV/0!	#DIV/0!	#DIV/0!
			#DIV/0!	#DIV/0!	#DIV/0!	#DIV/0!
			#DIV/0!	#DIV/0!	#DIV/0!	#DIV/0!
			#DIV/0!	#DIV/0!	#DIV/0!	#DIV/0!
			#DIV/0!	#DIV/0!	#DIV/0!	#DIV/0!
			#DIV/0!	#DIV/0!	#DIV/0!	#DIV/0!
			#DIV/0!	#DIV/0!	#DIV/0!	#DIV/0!
			#DIV/0!	#DIV/0!	#DIV/0!	#DIV/0!
			#DIV/0!	#DIV/0!	#DIV/0!	#DIV/0!
			#DIV/0!	#DIV/0!	#DIV/0!	#DIV/0!
			#DIV/0!	#DIV/0!	#DIV/0!	#DIV/0!
			#DIV/0!	#DIV/0!	#DIV/0!	#DIV/0!
			#DIV/0!	#DIV/0!	#DIV/0!	#DIV/0!
			#DIV/0!	#DIV/0!	#DIV/0!	#DIV/0!
			#DIV/0!	#DIV/0!	#DIV/0!	#DIV/0!
			#DIV/0!	#DIV/0!	#DIV/0!	#DIV/0!
			#DIV/0!	#DIV/0!	#DIV/0!	#DIV/0!
			#DIV/0!	#DIV/0!	#DIV/0!	#DIV/0!
			#DIV/0!	#DIV/0!	#DIV/0!	#DIV/0!
			#DIV/0!	#DIV/0!	#DIV/0!	#DIV/0!
			#DIV/0!	#DIV/0!	#DIV/0!	#DIV/0!
			#DIV/0!	#DIV/0!	#DIV/0!	#DIV/0!
			#DIV/0!	#DIV/0!	#DIV/0!	#DIV/0!
			#DIV/0!	#DIV/0!	#DIV/0!	#DIV/0!
			#DIV/0!	#DIV/0!	#DIV/0!	#DIV/0!
			#DIV/0!	#DIV/0!	#DIV/0!	#DIV/0!
			#DIV/0!	#DIV/0!	#DIV/0!	#DIV/0!
			#DIV/0!	#DIV/0!	#DIV/0!	#DIV/0!
			#DIV/0!	#DIV/0!	#DIV/0!	#DIV/0!
			#DIV/0!	#DIV/0!	#DIV/0!	#DIV/0!
			#DIV/0!	#DIV/0!	#DIV/0!	#DIV/0!
			#DIV/0!	#DIV/0!	#DIV/0!	#DIV/0!
			#DIV/0!	#DIV/0!	#DIV/0!	#DIV/0!
			#DIV/0!	#DIV/0!	#DIV/0!	#DIV/0!
			#DIV/0!	#DIV/0!	#DIV/0!	#DIV/0!
			#DIV/0!	#DIV/0!	#DIV/0!	#DIV/0!
			#DIV/0!	#DIV/0!	#DIV/0!	#DIV/0!
			#DIV/0!	#DIV/0!	#DIV/0!	#DIV/0!
			#DIV/0!	#DIV/0!	#DIV/0!	#DIV/0!
			#DIV/0!	#DIV/0!	#DIV/0!	#DIV/0!
			#DIV/0!	#DIV/0!	#DIV/0!	#DIV/0!
			#DIV/0!	#DIV/0!	#DIV/0!	#DIV/0!
			#DIV/0!	#DIV/0!	#DIV/0!	#DIV/0!
			#DIV/0!	#DIV/0!	#DIV/0!	#DIV/0!
			#DIV/0!	#DIV/0!	#DIV/0!	#DIV/0!
			#DIV/0!	#DIV/0!	#DIV/0!	#DIV/0!
			#DIV/0!	#DIV/0!	#DIV/0!	#DIV/0!
			#DIV/0!	#DIV/0!	#DIV/0!	#DIV/0!
			#DIV/0!	#DIV/0!	#DIV/0!	#DIV/0!
			#DIV/0!	#DIV/0!	#DIV/0!	#DIV/0!
			#DIV/0!	#DIV/0!	#DIV/0!	#DIV/0!
			#DIV/0!	#DIV/0!	#DIV/0!	#DIV/0!
			#DIV/0!	#DIV/0!	#DIV/0!	#DIV/0!
			#DIV/0!	#DIV/0!	#DIV/0!	#DIV/0!
			#DIV/0!	#DIV/0!	#DIV/0!	#DIV/0!
			#DIV/0!	#DIV/0!	#DIV/0!	#DIV/0!
			#DIV/0!	#DIV/0!	#DIV/0!	#DIV/0!
			#DIV/0!	#DIV/0!	#DIV/0!	#DIV/0!
			#DIV/0!	#DIV/0!	#DIV/0!	#DIV/0!
			#DIV/0!	#DIV/0!	#DIV/0!	#DIV/0!
			#DIV/0!	#DIV/0!	#DIV/0!	#DIV/0!
			#DIV/0!	#DIV/0!	#DIV/0!	#DIV/0!
			#DIV/0!	#DIV/0!	#DIV/0!	#DIV/0!
			#DIV/0!	#DIV/0!	#DIV/0!	#DIV/0!
			#DIV/0!	#DIV/0!	#DIV/0!	#DIV/0!
			#DIV/0!	#DIV/0!	#DIV/0!	#DIV/0!
			#DIV/0!	#DIV/0!	#DIV/0!	#DIV/0!
			#DIV/0!	#DIV/0!	#DIV/0!	#DIV/0!
			#DIV/0!	#DIV/0!	#DIV/0!	#DIV/0!
			#DIV/0!	#DIV/0!	#DIV/0!	#DIV/0!
			#DIV/0!	#DIV/0!	#DIV/0!	#DIV/0!
			#DIV/0!	#DIV/0!	#DIV/0!	#DIV/0!
			#DIV/0!	#DIV/0!	#DIV/0!	#DIV/0!
			#DIV/0!	#DIV/0!	#DIV/0!	#DIV/0!
			#DIV/0!	#DIV/0!	#DIV/0!	#DIV/0!
			#DIV/0!	#DIV/0!	#DIV/0!	#DIV/0!
			#DIV/0!	#DIV/0!	#DIV/0!	#DIV/0!
			#DIV/0!	#DIV/0!	#DIV/0!	#DIV/0!
			#DIV/0!	#DIV/0!	#DIV/0!	#DIV/0!
			#DIV/0!	#DIV/0!	#DIV/0!	#DIV/0!
			#DIV/0!	#DIV/0!	#DIV/0!	#DIV/0!
			#DIV/0!	#DIV/0!	#DIV/0!	#DIV/0!
			#DIV/0!	#DIV/0!	#DIV/0!	#DIV/0!
			#DIV/0!	#DIV/0!	#DIV/0!	#DIV/0!
			#DIV/0!	#DIV/0!	#DIV/0!	#DIV/0!
			#DIV/0!	#DIV/0!	#DIV/0!	#DIV/0!
			#DIV/0!	#DIV/0!	#DIV/0!	#DIV/0!
			#DIV/0!	#DIV/0!	#DIV/0!	#DIV/0!
			#DIV/0!	#DIV/0!	#DIV/0!	#DIV/0!
			#DIV/0!	#DIV/0!	#DIV/0!	#DIV/0!
			#DIV/0!	#DIV/0!	#DIV/0!	#DIV/0!
			#DIV/0!	#DIV/0!	#DIV/0!	#DIV/0!
			#DIV/0!	#DIV/0!	#DIV/0!	#DIV/0!
			#DIV/0!	#DIV/0!	#DIV/0!	#DIV/0!
			#DIV/0!	#DIV/0!	#DIV/0!	#DIV/0!
			#DIV/0!	#DIV/0!	#DIV/0!	#DIV/0!
			#DIV/0!	#DIV/0!	#DIV/0!	#DIV/0!
			#DIV/0!	#DIV/0!	#DIV/0!	#DIV/0!
			#DIV/0!	#DIV/0!	#DIV/0!	#DIV/0!
			#DIV/0!	#DIV/0!	#DIV/0!	#DIV/0!
			#DIV/0!	#DIV/0!	#DIV/0!	#DIV/0!
			#DIV/0!	#DIV/0!	#DIV/0!	#DIV/0!
			#DIV/0!	#DIV/0!	#DIV/0!	#DIV/0!
			#DIV/0!	#DIV/0!	#DIV/0!	#DIV/0!
			#DIV/0!	#DIV/0!	#DIV/0!	#DIV/0!
			#DIV/0!	#DIV/0!	#DIV/0!	#DIV/0!
			#DIV/0!	#DIV/0!	#DIV/0!	#DIV/0!
			#DIV/0!	#DIV/0!	#DIV/0!	#DIV/0!
			#DIV/0!	#DIV/0!	#DIV/0!	#DIV/0!
			#DIV/0!	#DIV/0!	#DIV/0!	#DIV/0!
			#DIV/0!	#DIV/0!	#DIV/0!	#DIV/0!
			#DIV/0!	#DIV/0!	#DIV/0!	#DIV/0!
			#DIV/0!	#DIV/0!	#DIV/0!	#DIV/0!
			#DIV/0!	#DIV/0!	#DIV/0!	#DIV/0!
			#DIV/0!	#DIV/0!	#DIV/0!	#DIV/0!
			#DIV/0!	#DIV/0!	#DIV/0!	#DIV/0!
			#DIV/0!	#DIV/0!	#DIV/0!	#DIV/0!
			#DIV/0!	#DIV/0!	#DIV/0!	#DIV/0!
			#DIV/0!	#DIV/0!	#DIV/0!	#DIV/0!
			#DIV/0!	#DIV/0!	#DIV/0!	#DIV/0!
			#DIV/0!	#DIV/0!	#DIV/0!	#DIV/0!
			#DIV/0!	#DIV/0!	#DIV/0!	#DIV/0!
			#DIV/0!	#DIV/0!	#DIV/0!	#DIV/0!
			#DIV/0!	#DIV/0!	#DIV/0!	#DIV/0!
			#DIV/0!	#DIV/0!	#DIV/0!	#DIV/0!
			#DIV/0!	#DIV/0!	#DIV/0!	#DIV/0!
			#DIV/0!	#DIV/0!	#DIV/0!	#DIV/0!
			#DIV/0!	#DIV/0!	#DIV/0!	#DIV/0!
			#DIV/0!	#DIV/0!	#DIV/0!	#DIV/0!
			#DIV/0!	#DIV/0!	#DIV/0!	#DIV/0!
			#DIV/0!	#DIV/0!	#DIV/0!	#DIV/0!
			#DIV/0!	#DIV/0!	#DIV/0!	#DIV/0!
			#DIV/0!	#DIV/0!	#DIV/0!	#DIV/0!
			#DIV/0!	#DIV/0!	#DIV/0!	#DIV/0!
			#DIV/0!	#DIV/0!	#DIV/0!	#DIV/0!
			#DIV/0!	#DIV/0!	#DIV/0!	#DIV/0!
			#DIV/0!	#DIV/0!	#DIV/0!	#DIV/0!
			#DIV/0!	#DIV/0!	#DIV/0!	#DIV/0!
			#DIV/0!	#DIV/0!	#DIV/0!	#DIV/0!
			#DIV/0!	#DIV/0!	#DIV/0!	#DIV/0!
			#DIV/0!	#DIV/0!	#DIV/0!	#DIV/0!
			#DIV/0!	#DIV/0!	#DIV/0!	#DIV/0!
			#DIV/0!	#DIV/0!	#DIV/0!	#DIV/0!
			#DIV/0!	#DIV/0!	#DIV/0!	#DIV/0!
			#DIV/0!	#DIV/0!	#DIV/0!	#DIV/0!
			#DIV/0!	#DIV/0!	#DIV/0!	#DIV/0!
			#DIV/0!	#DIV/0!	#DIV/0!	#DIV/0!
			#DIV/0!	#DIV/0!	#DIV/0!	#DIV/0!
			#DIV/0!	#DIV/0!	#DIV/0!	#DIV/0!
			#DIV/0!	#DIV/0!	#DIV/0!	#DIV/0!
			#DIV/0!	#DIV/0!	#DIV/0!	#DIV/0!
			#DIV/0!	#DIV/0!	#DIV/0!	#DIV/0!
			#DIV/0!	#DIV/0!	#DIV/0!	#DIV/0!
			#DIV/0!	#DIV/0!	#DIV/0!	#DIV/0!
			#DIV/0!	#DIV/0!	#DIV/0!	#DIV/0!
			#DIV/0!	#DIV/0!	#DIV/0!	#DIV/0!
			#DIV/0!	#DIV/0!	#DIV/0!	#DIV/0!
			#DIV/0!	#DIV/0!	#DIV/0!	#DIV/0!
			#DIV/0!	#DIV/0!	#DIV/0!	#DIV/0!
			#DIV/0!	#DIV/0!	#DIV/0!	#DIV/0!
			#DIV/0!	#DIV/0!	#DIV/0!	#DIV/0!
			#DIV/0!	#DIV/0!	#DIV/0!	#DIV/0!
			#DIV/0!	#DIV/0!	#DIV/0!	#DIV/0!
			#DIV/0!	#DIV/0!	#DIV/0!	#DIV/0!
			#DIV/0!	#DIV/0!	#DIV/0!	#DIV/0!
			#DIV/0!	#DIV/0!	#DIV/0!	#DIV/0!
			#DIV/0!	#DIV/0!	#DIV/0!	#DIV/0!
			#DIV/0!	#DIV/0!	#DIV/0!	#DIV/0!
			#DIV/0!	#DIV/0!	#DIV/0!	#DIV/0!
			#DIV/0!	#DIV/0!	#DIV/0!	#DIV/0!
			#DIV/0!	#DIV/0!	#DIV/0!	#DIV/0!
			#DIV/0!	#DIV/0!	#DIV/0!	#DIV/0!
			#DIV/0!	#DIV/0!	#DIV/0!	#DIV/0!
			#DIV/0!	#DIV/0!	#DIV/0!	#DIV/0!
			#DIV/0!	#DIV/0!	#DIV/0!	#DIV/0!
			#DIV/0!	#DIV/0!	#DIV/0!	#DIV/0!
			#DIV/0!	#DIV/0!	#DIV/0!	#DIV/0!
			#DIV/0!	#DIV/0!	#DIV/0!	#DIV/0!
			#DIV/0!	#DIV/0!	#DIV/0!	#DIV/0!
			#DIV/0!	#DIV/0!	#DIV/0!	#DIV/0!
			#DIV/0!	#DIV/0!	#DIV/0!	#DIV/0!
			#DIV/0!	#DIV/0!	#DIV/0!	#DIV/0!
			#DIV/0!	#DIV/0!	#DIV/0!	#DIV/0!
			#DIV/0!	#DIV/0!	#DIV/0!	#DIV/0!
			#DIV/0!	#DIV/0!	#DIV/0!	#DIV/0!
			#DIV/0!	#DIV/0!	#DIV/0!	#DIV/0!
			#DIV/0!	#DIV/0!	#DIV/0!	#DIV/0!
			#DIV/0!	#DIV/0!	#DIV/0!	#DIV/0!
			#DIV/0!	#DIV/0!	#DIV/0!	#DIV/0!
			#DIV/0!	#DIV/0!	#DIV/0!	#DIV/0!
			#DIV/0!	#DIV/0!	#DIV/0!	#DIV/0!
			#DIV/0!	#DIV/0!	#DIV/0!	#DIV/0!
			#DIV/0!	#DIV/0!	#DIV/0!	#DIV/0!
			#DIV/0!	#DIV/0!	#DIV/0!	#DIV/0!
			#DIV/0!	#DIV/0!	#DIV/0!	#DIV/0!
			#DIV/0!	#DIV/0!	#DIV/0!	#DIV/0!
			#DIV/0!	#DIV/0!	#DIV/0!	#DIV/0!
			#DIV/0!	#DIV/0!	#DIV/0!	#DIV/0!
			#DIV/0!	#DIV/0!	#DIV/0!	#DIV/0!
			#DIV/0!	#DIV/0!	#DIV/0!	#DIV/0!
			#DIV/0!	#DIV/0!	#DIV/0!	#DIV/0!
			#DIV/0!	#DIV/0!	#DIV/0!	#DIV/0!
			#DIV/0!	#DIV/0!	#DIV/0!	#DIV/0!
			#DIV/0!	#DIV/0!	#DIV/0!	#DIV/0!
			#DIV/0!	#DIV/0!	#DIV/0!	#DIV/0!
			#DIV/0!	#DIV/0!	#DIV/0!	#DIV/0!
			#DIV/0!	#DIV/0!	#DIV/0!	#DIV/0!
			#DIV/0!	#DIV/0!	#DIV/0!	#DIV/0!
			#DIV/0!	#DIV/0!	#DIV/0!	#DIV/0!
			#DIV/0!	#DIV/0!	#DIV/0!	#DIV/0!
			#DIV/0!	#DIV/0!	#DIV/0!	#DIV/0!
			#DIV/0!	#DIV/0!	#DIV/0!	#DIV/0!
			#DIV/0!	#DIV/0!	#DIV/0!	#DIV/0!
			#DIV/0!	#DIV/0!	#DIV/0!	#DIV/0!
			#DIV/0!	#DIV/0!	#DIV/0!	#DIV/0!
			#DIV/0!	#DIV/0!	#DIV/0!	#DIV/0!
			#DIV/0!	#DIV/0!	#DIV/0!	#DIV/0!
			#DIV/0!	#DIV/0!	#DIV/0!	#DIV/0!
			#DIV/0!	#DIV/0!	#DIV/0!	#DIV/0!
			#DIV/0!	#DIV/0!	#DIV/0!	#DIV/0!
			#DIV/0!	#DIV/0!	#DIV/0!	#DIV/0!
			#DIV/0!	#DIV/0!	#DIV/0!	#DIV/0!
			#DIV/0!	#DIV/0!	#DIV/0!	#DIV/0!
			#DIV/0!	#DIV/0!	#DIV/0!	#DIV/0!
			#DIV/0!	#DIV/0!	#DIV/0!	#DIV/0!
			#DIV/0!	#DIV/0!	#DIV/0!	#DIV/0!
			#DIV/0!	#DIV/0!	#DIV/0!	#DIV/0!
			#DIV/0!	#DIV/0!	#DIV/0!	#DIV/0!
			#DIV/0!	#DIV/0!	#DIV/0!	#DIV/0!
			#DIV/0!	#DIV/0!	#DIV/0!	#DIV/0!
			#DIV/0!	#DIV/0!	#DIV/0!	#DIV/0!
			#DIV/0!	#DIV/0!	#DIV/0!	#DIV/0!
			#DIV/0!	#DIV/0!	#DIV/0!	#DIV/0!
			#DIV/0!	#DIV/0!	#DIV/0!	#DIV/0!
			#DIV/0!	#DIV/0!	#DIV/0!	#DIV/0!
			#DIV/0!	#DIV/0!	#DIV/0!	#DIV/0!
			#DIV/0!	#DIV/0!	#DIV/0!	#DIV/0!
			#DIV/0!	#DIV/0!	#DIV/0!	#DIV/0!
			#DIV/0!	#DIV/0!	#DIV/0!	#DIV/0!
			#DIV/0!	#DIV/0!	#DIV/0!	#DIV/0!
			#DIV/0!	#DIV/0!	#DIV/0!	#DIV/0!
			#DIV/0!	#DIV/0!	#DIV/0!	#DIV/0!
			#DIV/0!	#DIV/0!	#DIV/0!	#DIV/0!
			#DIV/0!	#DIV/0!	#DIV/0!	#DIV/0!
			#DIV/0!	#DIV/0!	#DIV/0!	#DIV/0!
			#DIV/0!	#DIV/0!	#DIV/0!	#DIV/0!
			#DIV/0!	#DIV/0!	#DIV/0!	#DIV/0!
			#DIV/0!	#DIV/0!	#DIV/0!	#DIV/0!
			#DIV/0!	#DIV/0!	#DIV/0!	#DIV/0!
			#DIV/0!	#DIV/0!	#DIV/0!	#DIV/0!
			#DIV/0!	#DIV/0!	#DIV/0!	#DIV/0!
			#DIV/0!	#DIV/0!	#DIV/0!	#DIV/0!
			#DIV/0!	#DIV/0!	#DIV/0!	#DIV/0!
			#DIV/0!	#DIV/0!	#DIV/0!	#DIV/0!
			#DIV/0!	#DIV/0!	#DIV/0!	#DIV/0!
			#DIV/0!	#DIV/0!	#DIV/0!	#DIV/0!
			#DIV/0!	#DIV/0!	#DIV/0!	#DIV/0!
			#DIV/0!	#DIV/0!	#DIV/0!	#DIV/0!
			#DIV/0!	#DIV/0!	#DIV/0!	#DIV/0!
			#DIV/0!	#DIV/0!	#DIV/0!	#DIV/0!
			#DIV/0!	#DIV/0!	#DIV/0!	#DIV/0!
			#DIV/0!	#DIV/0!	#DIV/0!	#DIV/0!
			#DIV/0!	#DIV/0!	#DIV/0!	#DIV/0!
			#DIV/0!	#DIV/0!	#DIV/0!	#DIV/0!
			#DIV/0!	#DIV/0!	#DIV/0!	#DIV/0!
			#DIV/0!	#DIV/0!	#DIV/0!	#DIV/0!
			#DIV/0!	#DIV/0!	#DIV/0!	#DIV/0!
			#DIV/0!	#DIV/0!	#DIV/0!	#DIV/0!
			#DIV/0!	#DIV/0!	#DIV/0!	#DIV/0!
			#DIV/0!	#DIV/0!	#DIV/0!	#DIV/0!
			#DIV/0!	#DIV/0!	#DIV/0!	#DIV/0!
			#DIV/0!	#DIV/0!	#DIV/0!	#DIV/0!
			#DIV/0!	#DIV/0!	#DIV/0!	#DIV/0!
			#DIV/0!	#DIV/0!	#DIV/0!	#DIV/0!
			#DIV/0!	#DIV/0!	#DIV/0!	#DIV/0!
			#DIV/0!	#DIV/0!	#DIV/0!	#DIV/0!
			#DIV/0!	#DIV/0!	#DIV/0!	#DIV/0!
			#DIV/0!	#DIV/0!	#DIV/0!	#DIV/0!
			#DIV/0!	#DIV/0!	#DIV/0!	#DIV/0!
			#DIV/0!	#DIV/0!	#DIV/0!	#DIV/0!
			#DIV/0!	#DIV/0!	#DIV/0!	#DIV/0!
			#DIV/0!	#DIV/0!	#DIV/0!	#DIV/0!
			#DIV/0!	#DIV/0!	#DIV/0!	#DIV/0!
			#DIV/0!	#DIV/0!	#DIV/0!	#DIV/0!
			#DIV/0!	#DIV/0!	#DIV/0!	#DIV/0!
			#DIV/0!	#DIV/0!	#DIV/0!	#DIV/0!
			#DIV/0!	#DIV/0!	#DIV/0!	#DIV/0!
			#DIV/0!	#DIV/0!	#DIV/0!	#DIV/0!
			#DIV/0!	#DIV/0!	#DIV/0!	#DIV/0!
			#DIV/0!	#DIV/0!	#DIV/0!	#DIV/0!
			#DIV/0!	#DIV/0!	#DIV/0!	#DIV/0!
			#DIV/0!	#DIV/0!	#DIV/0!	#DIV/0!
			#DIV/0!	#DIV/0!	#DIV/0!	#DIV/0!
			#DIV/0!	#DIV/0!	#DIV/0!	#DIV/0!
			#DIV/0!	#DIV/0!	#DIV/0!	#DIV/0!
			#DIV/0!	#DIV/0!	#DIV/0!	#DIV/0!
			#DIV/0!	#DIV/0!	#DIV/0!	#DIV/0!
			#DIV/0!	#DIV/0!	#DIV/0!	#DIV/0!
			#DIV/0!	#DIV/0!	#DIV/0!	#DIV/0!
			#DIV/0!	#DIV/0!	#DIV/0!	#DIV/0!
			#DIV/0!	#DIV/0!	#DIV/0!	#DIV/0!
			#DIV/0!	#DIV/0!	#DIV/0!	#DIV/0!
			#DIV/0!	#DIV/0!	#DIV/0!	#DIV/0!
			#DIV/0!	#DIV/0!	#DIV/0!	#DIV/0!
			#DIV/0!	#DIV/0!	#DIV/0!	#DIV/0!
			#DIV/0!	#DIV/0!	#DIV/0!	#DIV/0!
			#DIV/0!	#DIV/0!	#DIV/0!	#DIV/0!
			#DIV/0!	#DIV/0!	#DIV/0!	#DIV/0!
			#DIV/0!	#DIV/0!	#DIV/0!	#DIV/0!
			#DIV/0!	#DIV/0!	#DIV/0!	#DIV/0!
			#DIV/0!	#DIV/0!	#DIV/0!	#DIV/0!
			#DIV/0!	#DIV/0!	#DIV/0!	#DIV/0!
			#DIV/0!	#DIV/0!	#DIV/0!	#DIV/0!
			#DIV/0!	#DIV/0!	#DIV/0!	#DIV/0!
			#DIV/0!	#DIV/0!	#DIV/0!	#DIV/0!
			#DIV/0!	#DIV/0!	#DIV/0!	#DIV/0!
			#DIV/0!	#DIV/0!	#DIV/0!	#DIV/0!
			#DIV/0!	#DIV/0!	#DIV/0!	#DIV/0!
			#DIV/0!	#DIV/0!	#DIV/0!	#DIV/0!
			#DIV/0!	#DIV/0!	#DIV/0!	#DIV/0!
			#DIV/0!	#DIV/0!	#DIV/0!	#DIV/0!
			#DIV/0!	#DIV/0!	#DIV/0!	#DIV/0!
			#DIV/0!	#DIV/0!	#DIV/0!	#DIV/0!
			#DIV/0!	#DIV/0!	#DIV/0!	#DIV/0!
			#DIV/0!	#DIV/0!	#DIV/0!	#DIV/0!
			#DIV/0!	#DIV/0!	#DIV/0!	#DIV/0!
			#DIV/0!	#DIV/0!	#DIV/0!	#DIV/0!
			#DIV/0!	#DIV/0!	#DIV/0!	#DIV/0!
			#DIV/0!	#DIV/0!	#DIV/0!	#DIV/0!
			#DIV/0!	#DIV/0!	#DIV/0!	#DIV/0!
			#DIV/0!	#DIV/0!	#DIV/0!	#DIV/0!
			#DIV/0!	#DIV/0!	#DIV/0!	#DIV/0!
			#DIV/0!	#DIV/0!	#DIV/0!	#DIV/0!
			#DIV/0!	#DIV/0!	#DIV/0!	#DIV/0!
			#DIV/0!	#DIV/0!	#DIV/0!	#DIV/0!
			#DIV/0!	#DIV/0!	#DIV/0!	#DIV/0!
			#DIV/0!	#DIV/0!	#DIV/0!	#DIV/0!
			#DIV/0!	#DIV/0!	#DIV/0!	#DIV/0!
			#DIV/0!	#DIV/0!	#DIV/0!	#DIV/0!
			#DIV/0!	#DIV/0!	#DIV/0!	#DIV/0!
			#DIV/0!	#DIV/0!	#DIV/0!	#DIV/0!
			#DIV/0!	#DIV/0!	#DIV/0!	#DIV/0!
			#DIV/0!	#DIV/0!	#DIV/0!	#DIV/0!
			#DIV/0!	#DIV/0!	#DIV/0!	#DIV/0!
			#DIV/0!	#DIV/0!	#DIV/0!	#DIV/0!
			#DIV/0!	#DIV/0!	#DIV/0!	#DIV/0!
			#DIV/0!	#DIV/0!	#DIV/0!	#DIV/0!
			#DIV/0!	#DIV/0!	#DIV/0!	#DIV/0!
			#DIV/0!	#DIV/0!	#DIV/0!	#DIV/0!
			#DIV/0!	#DIV/0!	#DIV/0!	#DIV/0!
			#DIV/0!	#DIV/0!	#DIV/0!	#DIV/0!
			#DIV/0!	#DIV/0!	#DIV/0!	#DIV/0!
			#DIV/0!	#DIV/0!	#DIV/0!	#DIV/0!
			#DIV/0!	#DIV/0!	#DIV/0!	#DIV/0!
			#DIV/0!	#DIV/0!	#DIV/0!	#DIV/0!
			#DIV/0!	#DIV/0!	#DIV/0!	#DIV/0!
			#DIV/0!	#DIV/0!	#DIV/0!	#DIV/0!
			#DIV/0!	#DIV/0!	#DIV/0!	#DIV/0!
			#DIV/0!	#DIV/0!	#DIV/0!	#DIV/0!
			#DIV/0!	#DIV/0!	#DIV/0!	#DIV/0!
			#DIV/0!	#DIV/0!	#DIV/0!	#DIV/0!
			#DIV/0!	#DIV/0!	#DIV/0!	#DIV/0!
			#DIV/0!	#DIV/0!	#DIV/0!	#DIV/0!
			#DIV/0!	#DIV/0!	#DIV/0!	#DIV/0!
			#DIV/0!	#DIV/0!	#DIV/0!	#DIV/0!
			#DIV/0!	#DIV/0!	#DIV/0!	#DIV/0!
			#DIV/0!	#DIV/0!	#DIV/0!	#DIV/0!
			#DIV/0!	#DIV/0!	#DIV/0!	#DIV/0!
			#DIV/0!	#DIV/0!	#DIV/0!	#DIV/0!
			#DIV/0!	#DIV/0!	#DIV/0!	#DIV/0!
			#DIV/0!	#DIV/0!	#DIV/0!	#DIV/0!
			#DIV/0!	#DIV/0!	#DIV/0!	#DIV/0!
			#DIV/0!	#DIV/0!	#DIV/0!	#DIV/0!
			#DIV/0!	#DIV/0!	#DIV/0!	#DIV/0!
			#DIV/0!	#DIV/0!	#DIV/0!	#DIV/0!
			#DIV/0!	#DIV/0!	#DIV/0!	#DIV/0!
			#DIV/0!	#DIV/0!	#DIV/0!	#DIV/0!
			#DIV/0!	#DIV/0!	#DIV/0!	#DIV/0!
			#DIV/0!	#DIV/0!	#DIV/0!	#DIV/0!
			#DIV/0!	#DIV/0!	#DIV/0!	#DIV/0!
			#DIV/0!	#DIV/0!	#DIV/0!	#DIV/0!
			#DIV/0!	#DIV/0!	#DIV/0!	#DIV/0!
			#DIV/0!	#DIV/0!	#DIV/0!	#DIV/0!
			#DIV/0!	#DIV/0!	#DIV/0!	#DIV/0!
			#DIV/0!	#DIV/0!	#DIV/0!	#DIV/0!
			#DIV/0!	#DIV/0!	#DIV/0!	#DIV/0!
			#DIV/0!	#DIV/0!	#DIV/0!	#DIV/0!
			#DIV/0!	#DIV/0!	#DIV/0!	#DIV/0!
			#DIV/0!	#DIV/0!	#DIV/0!	#DIV/0!
			#DIV/0!	#DIV/0!	#DIV/0!	#DIV/0!
			#DIV/0!	#DIV/0!	#DIV/0!	#DIV/0!
			#DIV/0!	#DIV/0!	#DIV/0!	#DIV/0!
			#DIV/0!	#DIV/0!	#DIV/0!	#DIV/0!
			#DIV/0!	#DIV/0!	#DIV/0!	#DIV/0!
			#DIV/0!	#DIV/0!	#DIV/0!	#DIV/0!
			#DIV/0!	#DIV/0!	#DIV/0!	#DIV/0!
			#DIV/0!	#DIV/0!	#DIV/0!	#DIV/0!
			#DIV/0!	#DIV/0!	#DIV/0!	#DIV/0!
			#DIV/0!	#DIV/0!	#DIV/0!	#DIV/0!
			#DIV/0!	#DIV/0!	#DIV/0!	#DIV/0!
			#DIV/0!	#DIV/0!	#DIV/0!	#DIV/0!
			#DIV/0!	#DIV/0!	#DIV/0!	#DIV/0!
			#DIV/0!	#DIV/0!	#DIV/0!	#DIV/0!
			#DIV/0!	#DIV/0!	#DIV/0!	#DIV/0!
			#DIV/0!	#DIV/0!	#DIV/0!	#DIV/0!
			#DIV/0!	#DIV/0!	#DIV/0!	#DIV/0!
			#DIV/0!	#DIV/0!	#DIV/0!	#DIV/0!
			#DIV/0!	#DIV/0!	#DIV/0!	#DIV/0!
			#DIV/0!	#DIV/0!	#DIV/0!	#DIV/0!
			#DIV/0!	#DIV/0!	#DIV/0!	#DIV/0!
			#DIV/0!	#DIV/0!	#DIV/0!	#DIV/0!
			#DIV/0!	#DIV/0!	#DIV/0!	#DIV/0!
			#DIV/0!	#DIV/0!	#DIV/0!	#DIV/0!
			#DIV/0!	#DIV/0!	#DIV/0!	#DIV/0!
			#DIV/0!	#DIV/0!	#DIV/0!	#DIV/0!
			#DIV/0!	#DIV/0!	#DIV/0!	#DIV/0!
			#DIV/0!	#DIV/0!	#DIV/0!	#DIV/0!
			#DIV/0!	#DIV/0!	#DIV/0!	#DIV/0!
			#DIV/0!	#DIV/0!	#DIV/0!	#DIV/0!
			#DIV/0!	#DIV/0!	#DIV/0!	#DIV/0!
			#DIV/0!	#DIV/0!	#DIV/0!	#DIV/0!
			#DIV/0!	#DIV/0!	#DIV/0!	#DIV/0!
			#DIV/0!	#DIV/0!	#DIV/0!	#DIV/0!
			#DIV/0!	#DIV/0!	#DIV/0!	#DIV/0!
			#DIV/0!	#DIV/0!	#DIV/0!	#DIV/0!
			#DIV/0!	#DIV/0!	#DIV/0!	#DIV/0!
			#DIV/0!	#DIV/0!	#DIV/0!	#DIV/0!
			#DIV/0!	#DIV/0!	#DIV/0!	#DIV/0!
			#DIV/0!	#DIV/0!	#DIV/0!	#DIV/0!
			#DIV/0!	#DIV/0!	#DIV/0!	#DIV/0!
			#DIV/0!	#DIV/0!	#DIV/0!	#DIV/0!
			#DIV/0!	#DIV/0!	#DIV/0!	#DIV/0!
			#DIV/0!	#DIV/0!	#DIV/0!	#DIV/0!
			#DIV/0!	#DIV/0!	#DIV/0!	#DIV/0!
			#DIV/0!	#DIV/0!	#DIV/0!	#DIV/0!
			#DIV/0!	#DIV/0!	#DIV/0!	#DIV/0!
			#DIV/0!	#DIV/0!	#DIV/0!	#DIV/0!
			#DIV/0!	#DIV/0!	#DIV/0!	#DIV/0!
			#DIV/0!	#DIV/0!	#DIV/0!	#DIV/0!
			#DIV/0!	#DIV/0!	#DIV/0!	#DIV/0!
			#DIV/0!	#DIV/0!	#DIV/0!	#DIV/0!
			#DIV/0!	#DIV/0!	#DIV/0!	#DIV/0!
			#DIV/0!	#DIV/0!	#DIV/0!	#DIV/0!
			#DIV/0!	#DIV/0!	#DIV/0!	#DIV/0!
			#DIV/0!	#DIV/0!	#DIV/0!	#DIV/0!
			#DIV/0!	#DIV/0!	#DIV/0!	#DIV/0!
			#DIV/0!	#DIV/0!	#DIV/0!	#DIV/0!
			#DIV/0!	#DIV/0!	#DIV/0!	#DIV/0!
			#DIV/0!	#DIV/0!	#DIV/0!	#DIV/0!
			#DIV/0!	#DIV/0!	#DIV/0!	#DIV/0!
			#DIV/0!	#DIV/0!	#DIV/0!	#DIV/0!
			#DIV/0!	#DIV/0!	#DIV/0!	#DIV/0!
			#DIV/0!	#DIV/0!	#DIV/0!	#DIV/0!
			#DIV/0!	#DIV/0!	#DIV/0!	#DIV/0!
			#DIV/0!	#DIV/0!	#DIV/0!	#DIV/0!
			#DIV/0!	#DIV/0!	#DIV/0!	#DIV/0!
			#DIV/0!	#DIV/0!	#DIV/0!	#DIV/0!
			#DIV/0!	#DIV/0!	#DIV/0!	#DIV/0!
			#DIV/0!	#DIV/0!	#DIV/0!	#DIV/0!
			#DIV/0!	#DIV/0!	#DIV/0!	#DIV/0!
			#DIV/0!	#DIV/0!	#DIV/0!	#DIV/0!
			#DIV/0!	#DIV/0!	#DIV/0!	#DIV/0!
			#DIV/0!	#DIV/0!	#DIV/0!	#DIV/0!
			#DIV/0!	#DIV/0!	#DIV/0!	#DIV/0!
			#DIV/0!	#DIV/0!	#DIV/0!	#DIV/0!
			#DIV/0!	#DIV/0!	#DIV/0!	#DIV/0!
			#DIV/0!	#DIV/0!	#DIV/0!	#DIV/0!
			#DIV/0!	#DIV/0!	#DIV/0!	#DIV/0!
			#DIV/0!	#DIV/0!	#DIV/0!	#DIV/0!
			#DIV/0!	#DIV/0!	#DIV/0!	#DIV/0!
			#DIV/0!	#DIV/0!	#DIV/0!	#DIV/0!
			#DIV/0!	#DIV/0!	#DIV/0!	#DIV/0!
			#DIV/0!	#DIV/0!	#DIV/0!	#DIV/0!
			#DIV/0!	#DIV/0!	#DIV/0!	#DIV/0!
			#DIV/0!	#DIV/0!	#DIV/0!	#DIV/0!
			#DIV/0!	#DIV/0!	#DIV/0!	#DIV/0!
			#DIV/0!	#DIV/0!	#DIV/0!	#DIV/0!
			#DIV/0!	#DIV/0!	#DIV/0!	#DIV/0!
			#DIV/0!	#DIV/0!	#DIV/0!	#DIV/0!
			#DIV/0!	#DIV/0!	#DIV/0!	#DIV/0!
			#DIV/0!	#DIV/0!	#DIV/0!	#DIV/0!
			#DIV/0!	#DIV/0!	#DIV/0!	#DIV/0!
			#DIV/0!	#DIV/0!	#DIV/0!	#DIV/0!
			#DIV/0!	#DIV/0!	#DIV/0!	#DIV/0!
			#DIV/0!	#DIV/0!	#DIV/0!	#DIV/0!
			#DIV/0!	#DIV/0!	#DIV/0!	#DIV/0!
			#DIV/0!	#DIV/0!	#DIV/0!	#DIV/0!
			#DIV/0!	#DIV/0!	#DIV/0!	#DIV/0!
			#DIV/0!	#DIV/0!	#DIV/0!	#DIV/0!
			#DIV/0!	#DIV/0!	#DIV/0!	#DIV/0!
			#DIV/0!	#DIV/0!	#DIV/0!	#DIV/0!
			#DIV/0!	#DIV/0!	#DIV/0!	#DIV/0!
			#DIV/0!	#DIV/0!	#DIV/0!	#DIV/0!
			#DIV/0!	#DIV/0!	#DIV/0!	#DIV/0!
			#DIV/0!	#DIV/0!	#DIV/0!	#DIV/0!
			#DIV/0!	#DIV/0!	#DIV/0!	#DIV/0!
			#DIV/0!	#DIV/0!	#DIV/0!	#DIV/0!
			#DIV/0!	#DIV/0!	#DIV/0!	#DIV/0!
			#DIV/0!	#DIV/0!	#DIV/0!	#DIV/0!
			#DIV/0!	#DIV/0!	#DIV/0!	#DIV/0!
			#DIV/0!	#DIV/0!	#DIV/0!	#DIV/0!
			#DIV/0!	#DIV/0!	#DIV/0!	#DIV/0!
			#DIV/0!	#DIV/0!	#DIV/0!	#DIV/0!
			#DIV/0!	#DIV/0!	#DIV/0!	#DIV/0!
			#DIV/0!	#DIV/0!	#DIV/0!	#DIV/0!
			#DIV/0!	#DIV/0!	#DIV/0!	#DIV/0!
			#DIV/0!	#DIV/0!	#DIV/0!	#DIV/0!
			#DIV/0!	#DIV/0!	#DIV/0!	#DIV/0!
			#DIV/0!	#DIV/0!	#DIV/0!	#DIV/0!
			#DIV/0!	#DIV/0!	#DIV/0!	#DIV/0!
			#DIV/0!	#DIV/0!	#DIV/0!	#DIV/0!
			#DIV/0!	#DIV/0!	#DIV/0!	#DIV/0!
			#DIV/0!	#DIV/0!	#DIV/0!	#DIV/0!
			#DIV/0!	#DIV/0!	#DIV/0!	#DIV/0!
			#DIV/0!	#DIV/0!	#DIV/0!	#DIV/0!
			#DIV/0!	#DIV/0!	#DIV/0!	#DIV/0!
			#DIV/0!	#DIV/0!	#DIV/0!	#DIV/0!
			#DIV/0!	#DIV/0!	#DIV/0!	#DIV/0!
			#DIV/0!	#DIV/0!	#DIV/0!	#DIV/0!
			#DIV/0!	#DIV/0!	#DIV/0!	#DIV/0!
			#DIV/0!	#DIV/0!	#DIV/0!	#DIV/0!
			#DIV/0!	#DIV/0!	#DIV/0!	#DIV/0!
			#DIV/0!	#DIV/0!	#DIV/0!	#DIV/0!
			#DIV/0!	#DIV/0!	#DIV/0!	#DIV/0!
			#DIV/0!	#DIV/0!	#DIV/0!	#DIV/0!
			#DIV/0!	#DIV/0!	#DIV/0!	#DIV/0!
			#DIV/0!	#DIV/0!	#DIV/0!	#DIV/0!
			#DIV/0!	#DIV/0!	#DIV/0!	#DIV/0!
			#DIV/0!	#DIV/0!	#DIV/0!	#DIV/0!
			#DIV/0!	#DIV/0!	#DIV/0!	#DIV/0!
			#DIV/0!	#DIV/0!	#DIV/0!	#DIV/0!
			#DIV/0!	#DIV/0!	#DIV/0!	#DIV/0!
			#DIV/0!	#DIV/0!	#DIV/0!	#DIV/0!
			#DIV/0!	#DIV/0!	#DIV/0!	#DIV/0!
			#DIV/0!	#DIV/0!	#DIV/0!	#DIV/0!
			#DIV/0!	#DIV/0!	#DIV/0!	#DIV/0!
			#DIV/0!	#DIV/0!	#DIV/0!	#DIV/0!
			#DIV/0!	#DIV/0!	#DIV/0!	#DIV/0!
			#DIV/0!	#DIV/0!	#DIV/0!	#DIV/0!
			#DIV/0!	#DIV/0!	#DIV/0!	#DIV/0!
			#DIV/0!	#DIV/0!	#DIV/0!	#DIV/0!
			#DIV/0!	#DIV/0!	#DIV/0!	#DIV/0!
			#DIV/0!	#DIV/0!	#DIV/0!	#DIV/0!
			#DIV/0!	#DIV/0!	#DIV/0!	#DIV/0!
			#DIV/0!	#DIV/0!	#DIV/0!	#DIV/0!
			#DIV/0!	#DIV/0!	#DIV/0!	#DIV/0!
			#DIV/0!	#DIV/0!	#DIV/0!	#DIV/0!
			#DIV/0!	#DIV/0!	#DIV/0!	#DIV/0!
			#DIV/0!	#DIV/0!	#DIV/0!	#DIV/0!
			#DIV/0!	#DIV/0!	#DIV/0!	#DIV/0!
			#DIV/0!	#DIV/0!	#DIV/0!	#DIV/0!
			#DIV/0!	#DIV/0!	#DIV/0!	#DIV/0!
			#DIV/0!	#DIV/0!	#DIV/0!	#DIV/0!
			#DIV/0!	#DIV/0!	#DIV/0!	#DIV/0!
			#DIV/0!	#DIV/0!	#DIV/0!	#DIV/0!
			#DIV/0!	#DIV/0!	#DIV/0!	#DIV/0!
			#DIV/0!	#DIV/0!	#DIV/0!	#DIV/0!
			#DIV/0!	#DIV/0!	#DIV/0!	#DIV/0!
			#DIV/0!	#DIV/0!	#DIV/0!	#DIV/0!
			#DIV/0!	#DIV/0!	#DIV/0!	#DIV/0!
			#DIV/0!	#DIV/0!	#DIV/0!	#DIV/0!
			#DIV/0!	#DIV/0!	#DIV/0!	#DIV/0!
			#DIV/0!	#DIV/0!	#DIV/0!	#DIV/0!
			#DIV/0!	#DIV/0!	#DIV/0!	#DIV/0!
			#DIV/0!	#DIV/0!	#DIV/0!	#DIV/0!
			#DIV/0!	#DIV/0!	#DIV/0!	#DIV/0!
			#DIV/0!	#DIV/0!	#DIV/0!	#DIV/0!
			#DIV/0!	#DIV/0!	#DIV/0!	#DIV/0!
			#DIV/0!	#DIV/0!	#DIV/0!	#DIV/0!
			#DIV/0!	#DIV/0!	#DIV/0!	#DIV/0!
			#DIV/0!	#DIV/0!	#DIV/0!	#DIV/0!
			#DIV/0!	#DIV/0!	#DIV/0!	#DIV/0!
			#DIV/0!	#DIV/0!	#DIV/0!	#DIV/0!
			#DIV/0!	#DIV/0!	#DIV/0!	#DIV/0!
			#DIV/0!	#DIV/0!	#DIV/0!	#DIV/0!
			#DIV/0!	#DIV/0!	#DIV/0!	#DIV/0!
			#DIV/0!	#DIV/0!	#DIV/0!	#DIV/0!
			#DIV/0!	#DIV/0!	#DIV/0!	#DIV/0!
			#DIV/0!	#DIV/0!	#DIV/0!	#DIV/0!
			#DIV/0!	#DIV/0!	#DIV/0!	#DIV/0!
			#DIV/0!	#DIV/0!	#DIV/0!	#DIV/0!
			#DIV/0!	#DIV/0!	#DIV/0!	#DIV/0!
			#DIV/0!	#DIV/0!	#DIV/0!	#DIV/0!
			#DIV/0!	#DIV/0!	#DIV/0!	#DIV/0!
			#DIV/0!	#DIV/0!	#DIV/0!	#DIV/0!
			#DIV/0!	#DIV/0!	#DIV/0!	#DIV/0!
			#DIV/0!	#DIV/0!	#DIV/0!	#DIV/0!
			#DIV/0!	#DIV/0!	#DIV/0!	#DIV/0!
			#DIV/0!	#DIV/0!	#DIV/0!	#DIV/0!
			#DIV/0!	#DIV/0!	#DIV/0!	#DIV/0!
			#DIV/0!	#DIV/0!	#DIV/0!	#DIV/0!
			#DIV/0!	#DIV/0!	#DIV/0!	#DIV/0!
			#DIV/0!	#DIV/0!	#DIV/0!	#DIV/0!
			#DIV/0!	#DIV/0!	#DIV/0!	#DIV/0!
			#DIV/0!	#DIV/0!	#DIV/0!	#DIV/0!
			#DIV/0!	#DIV/0!	#DIV/0!	#DIV/0!
			#DIV/0!	#DIV/0!	#DIV/0!	#DIV/0!
			#DIV/0!	#DIV/0!	#DIV/0!	#DIV/0!
			#DIV/0!	#DIV/0!	#DIV/0!	#DIV/0!
			#DIV/0!	#DIV/0!	#DIV/0!	#DIV/0!
			#DIV/0!	#DIV/0!	#DIV/0!	#DIV/0!
			#DIV/0!	#DIV/0!	#DIV/0!	#DIV/0!
			#DIV/0!	#DIV/0!	#DIV/0!	#DIV/0!
			#DIV/0!	#DIV/0!	#DIV/0!	#DIV/0!
			#DIV/0!	#DIV/0!	#DIV/0!	#DIV/0!
			#DIV/0!	#DIV/0!	#DIV/0!	#DIV/0!
			#DIV/0!	#DIV/0!	#DIV/0!	#DIV/0!
			#DIV/0!	#DIV/0!	#DIV/0!	#DIV/0!
			#DIV/0!	#DIV/0!	#DIV/0!	#DIV/0!
			#DIV/0!	#DIV/0!	#DIV/0!	#DIV/0!
			#DIV/0!	#DIV/0!	#DIV/0!	#DIV/0!
			#DIV/0!	#DIV/0!	#DIV/0!	#DIV/0!
			#DIV/0!	#DIV/0!	#DIV/0!	#DIV/0!
			#DIV/0!	#DIV/0!	#DIV/0!	#DIV/0!
			#DIV/0!	#DIV/0!	#DIV/0!	#DIV/0!
			#DIV/0!	#DIV/0!	#DIV/0!	#DIV/0!
			#DIV/0!	#DIV/0!	#DIV/0!	#DIV/0!
			#DIV/0!	#DIV/0!	#DIV/0!	#DIV/0!
			#DIV/0!	#DIV/0!	#DIV/0!	#DIV/0!
			#DIV/0!	#DIV/0!	#DIV/0!	#DIV/0!
			#DIV/0!	#DIV/0!	#DIV/0!	#DIV/0!
			#DIV/0!	#DIV/0!	#DIV/0!	#DIV/0!
			#DIV/0!	#DIV/0!	#DIV/0!	#DIV/0!
			#DIV/0!	#DIV/0!	#DIV/0!	#DIV/0!
			#DIV/0!	#DIV/0!	#DIV/0!	#DIV/0!
			#DIV/0!	#DIV/0!	#DIV/0!	#DIV/0!
			#DIV/0!	#DIV/0!	#DIV/0!	#DIV/0!
			#DIV/0!	#DIV/0!	#DIV/0!	#DIV/0!
			#DIV/0!	#DIV/0!	#DIV/0!	#DIV/0!
			#DIV/0!	#DIV/0!	#DIV/0!	#DIV/0!
			#DIV/0!	#DIV/0!	#DIV/0!	#DIV/0!
			#DIV/0!	#DIV/0!	#DIV/0!	#DIV/0!
			#DIV/0!	#DIV/0!	#DIV/0!	#DIV/0!
			#DIV/0!	#DIV/0!	#DIV/0!	#DIV/0!
			#DIV/0!	#DIV/0!	#DIV/0!	#DIV/0!
			#DIV/0!	#DIV/0!	#DIV/0!	#DIV/0!
			#DIV/0!	#DIV/0!	#DIV/0!	#DIV/0!
			#DIV/0!	#DIV/0!	#DIV/0!	#DIV/0!
			#DIV/0!	#DIV/0!	#DIV/0!	#DIV/0!
			#DIV/0!	#DIV/0!	#DIV/0!	#DIV/0!
			#DIV/0!	#DIV/0!	#DIV/0!	#DIV/0!
			#DIV/0!	#DIV/0!	#DIV/0!	#DIV/0!
			#DIV/0!	#DIV/0!	#DIV/0!	#DIV/0!
			#DIV/0!	#DIV/0!	#DIV/0!	#DIV/0!
			#DIV/0!	#DIV/0!	#DIV/0!	#DIV/0!
			#DIV/0!	#DIV/0!	#DIV/0!	#DIV/0!
			#DIV/0!	#DIV/0!	#DIV/0!	#DIV/0!
			#DIV/0!	#DIV/0!	#DIV/0!	#DIV/0!
			#DIV/0!	#DIV/0!	#DIV/0!	#DIV/0!
			#DIV/0!	#DIV/0!	#DIV/0!	#DIV/0!
			#DIV/0!	#DIV/0!	#DIV/0!	#DIV/0!
			#DIV/0!	#DIV/0!	#DIV/0!	#DIV/0!
			#DIV/0!	#DIV/0!	#DIV/0!	#DIV/0!
			#DIV/0!	#DIV/0!	#DIV/0!	#DIV/0!
			#DIV/0!	#DIV/0!	#DIV/0!	#DIV/0!
			#DIV/0!	#DIV/0!	#DIV/0!	#DIV/0!
			#DIV/0!	#DIV/0!	#DIV/0!	#DIV/0!
			#DIV/0!	#DIV/0!	#DIV/0!	#DIV/0!
			#DIV/0!	#DIV/0!	#DIV/0!	#DIV/0!
			#DIV/0!	#DIV/0!	#DIV/0!	#DIV/0!
			#DIV/0!	#DIV/0!	#DIV/0!	#DIV/0!
			#DIV/0!	#DIV/0!	#DIV/0!	#DIV/0!
			#DIV/0!	#DIV/0!	#DIV/0!	#DIV/0!
			#DIV/0!	#DIV/0!	#DIV/0!	#DIV/0!
			#DIV/0!	#DIV/0!	#DIV/0!	#DIV/0!
			#DIV/0!	#DIV/0!	#DIV/0!	#DIV/0!
			#DIV/0!	#DIV/0!	#DIV/0!	#DIV/0!
			#DIV/0!	#DIV/0!	#DIV/0!	#DIV/0!
			#DIV/0!	#DIV/0!	#DIV/0!	#DIV/0!
			#DIV/0!	#DIV/0!	#DIV/0!	#DIV/0!
			#DIV/0!	#DIV/0!	#DIV/0!	#DIV/0!
			#DIV/0!	#DIV/0!	#DIV/0!	#DIV/0!
			#DIV/0!	#DIV/0!	#DIV/0!	#DIV/0!
			#DIV/0!	#DIV/0!	#DIV/0!	#DIV/0!
			#DIV/0!	#DIV/0!	#DIV/0!	#DIV/0!
			#DIV/0!	#DIV/0!	#DIV/0!	#DIV/0!
			#DIV/0!	#DIV/0!	#DIV/0!	#DIV/0!
			#DIV/0!	#DIV/0!	#DIV/0!	#DIV/0!
			#DIV/0!	#DIV/0!	#DIV/0!	#DIV/0!
			#DIV/0!	#DIV/0!	#DIV/0!	#DIV/0!
			#DIV/0!	#DIV/0!	#DIV/0!	#DIV/0!
			#DIV/0!	#DIV/0!	#DIV/0!	#DIV/0!
			#DIV/0!	#DIV/0!	#DIV/0!	#DIV/0!
			#DIV/0!	#DIV/0!	#DIV/0!	#DIV/0!
			#DIV/0!	#DIV/0!	#DIV/0!	#DIV/0!
			#DIV/0!	#DIV/0!	#DIV/0!	#DIV/0!
			#DIV/0!	#DIV/0!	#DIV/0!	#DIV/0!
			#DIV/0!	#DIV/0!	#DIV/0!	#DIV/0!
			#DIV/0!	#DIV/0!	#DIV/0!	#DIV/0!
			#DIV/0!	#DIV/0!	#DIV/0!	#DIV/0!
			#DIV/0!	#DIV/0!	#DIV/0!	#DIV/0!
			#DIV/0!	#DIV/0!	#DIV/0!	#DIV/0!
			#DIV/0!	#DIV/0!	#DIV/0!	#DIV/0!
			#DIV/0!	#DIV/0!	#DIV/0!	#DIV/0!
			#DIV/0!	#DIV/0!	#DIV/0!	#DIV/0!
			#DIV/0!	#DIV/0!	#DIV/0!	#DIV/0!
			#DIV/0!	#DIV/0!	#DIV/0!	#DIV/0!
			#DIV/0!	#DIV/0!	#DIV/0!	#DIV/0!
			#DIV/0!	#DIV/0!	#DIV/0!	#DIV/0!
			#DIV/0!	#DIV/0!	#DIV/0!	#DIV/0!
			#DIV/0!	#DIV/0!	#DIV/0!	#DIV/0!
			#DIV/0!	#DIV/0!	#DIV/0!	#DIV/0!
			#DIV/0!	#DIV/0!	#DIV/0!	#DIV/0!
			#DIV/0!	#DIV/0!	#DIV/0!	#DIV/0!
			#DIV/0!	#DIV/0!	#DIV/0!	#DIV/0!
			#DIV/0!	#DIV/0!	#DIV/0!	#DIV/0!
			#DIV/0!	#DIV/0!	#DIV/0!	#DIV/0!
			#DIV/0!	#DIV/0!	#DIV/0!	#DIV/0!
			#DIV/0!	#DIV/0!	#DIV/0!	#DIV/0!
			#DIV/0!	#DIV/0!	#DIV/0!	#DIV/0!
			#DIV/0!	#DIV/0!	#DIV/0!	#DIV/0!
			#DIV/0!	#DIV/0!	#DIV/0!	#DIV/0!
			#DIV/0!	#DIV/0!	#DIV/0!	#DIV/0!
			#DIV/0!	#DIV/0!	#DIV/0!	#DIV/0!
			#DIV/0!	#DIV/0!	#DIV/0!	#DIV/0!
			#DIV/0!	#DIV/0!	#DIV/0!	#DIV/0!
			#DIV/0!	#DIV/0!	#DIV/0!	#DIV/0!
			#DIV/0!	#DIV/0!	#DIV/0!	#DIV/0!
			#DIV/0!	#DIV/0!	#DIV/0!	#DIV/0!
			#DIV/0!	#DIV/0!	#DIV/0!	#DIV/0!
			#DIV/0!	#DIV/0!	#DIV/0!	#DIV/0!
			#DIV/0!	#DIV/0!	#DIV/0!	#DIV/0!
			#DIV/0!	#DIV/0!	#DIV/0!	#DIV/0!
			#DIV/0!	#DIV/0!	#DIV/0!	#DIV/0!
			#DIV/0!	#DIV/0!	#DIV/0!	#DIV/0!
			#DIV/0!	#DIV/0!	#DIV/0!	#DIV/0!
			#DIV/0!	#DIV/0!	#DIV/0!	#DIV/0!
			#DIV/0!	#DIV/0!	#DIV/0!	#DIV/0!
			#DIV/0!	#DIV/0!	#DIV/0!	#DIV/0!
			#DIV/0!	#DIV/0!	#DIV/0!	#DIV/0!
			#DIV/0!	#DIV/0!	#DIV/0!	#DIV/0!
			#DIV/0!	#DIV/0!	#DIV/0!	#DIV/0!
			#DIV/0!	#DIV/0!	#DIV/0!	#DIV/0!
			#DIV/0!	#DIV/0!	#DIV/0!	#DIV/0!
			#DIV/0!	#DIV/0!	#DIV/0!	#DIV/0!
			#DIV/0!	#DIV/0!	#DIV/0!	#DIV/0!
			#DIV/0!	#DIV/0!	#DIV/0!	#DIV/0!
			#DIV/0!	#DIV/0!	#DIV/0!	#DIV/0!
			#DIV/0!	#DIV/0!	#DIV/0!	#DIV/0!
			#DIV/0!	#DIV/0!	#DIV/0!	#DIV/0!
			#DIV/0!	#DIV/0!	#DIV/0!	#DIV/0!
			#DIV/0!	#DIV/0!	#DIV/0!	#DIV/0!
			#DIV/0!	#DIV/0!	#DIV/0!	#DIV/0!
			#DIV/0!	#DIV/0!	#DIV/0!	#DIV/0!
			#DIV/0!	#DIV/0!	#DIV/0!	#DIV/0!
			#DIV/0!	#DIV/0!	#DIV/0!	#DIV/0!
			#DIV/0!	#DIV/0!	#DIV/0!	#DIV/0!
			#DIV/0!	#DIV/0!	#DIV/0!	#DIV/0!
			#DIV/0!	#DIV/0!	#DIV/0!	#DIV/0!
			#DIV/0!	#DIV/0!	#DIV/0!	#DIV/0!
			#DIV/0!	#DIV/0!	#DIV/0!	#DIV/0!
			#DIV/0!	#DIV/0!	#DIV/0!	#DIV/0!
			#DIV/0!	#DIV/0!	#DIV/0!	#DIV/0!
			#DIV/0!	#DIV/0!	#DIV/0!	#DIV/0!
			#DIV/0!	#DIV/0!	#DIV/0!	#DIV/0!
			#DIV/0!	#DIV/0!	#DIV/0!	#DIV/0!
			#DIV/0!	#DIV/0!	#DIV/0!	#DIV/0!
			#DIV/0!	#DIV/0!	#DIV/0!	#DIV/0!
			#DIV/0!	#DIV/0!	#DIV/0!	#DIV/0!
			#DIV/0!	#DIV/0!	#DIV/0!	#DIV/0!
			#DIV/0!	#DIV/0!	#DIV/0!	#DIV/0!
			#DIV/0!	#DIV/0!	#DIV/0!	#DIV/0!
			#DIV/0!	#DIV/0!	#DIV/0!	#DIV/0!
			#DIV/0!	#DIV/0!	#DIV/0!	#DIV/0!
			#DIV/0!	#DIV/0!	#DIV/0!	#DIV/0!
			#DIV/0!	#DIV/0!	#DIV/0!	#DIV/0!
			#DIV/0!	#DIV/0!	#DIV/0!	#DIV/0!
			#DIV/0!	#DIV/0!	#DIV/0!	#DIV/0!
			#DIV/0!	#DIV/0!	#DIV/0!	#DIV/0!
			#DIV/0!	#DIV/0!	#DIV/0!	#DIV/0!
			#DIV/0!	#DIV/0!	#DIV/0!	#DIV/0!
			#DIV/0!	#DIV/0!	#DIV/0!	#DIV/0!
			#DIV/0!	#DIV/0!	#DIV/0!	#DIV/0!
			#DIV/0!	#DIV/0!	#DIV/0!	#DIV/0!
			#DIV/0!	#DIV/0!	#DIV/0!	#DIV/0!
			#DIV/0!	#DIV/0!	#DIV/0!	#DIV/0!
			#DIV/0!	#DIV/0!	#DIV/0!	#DIV/0!
			#DIV/0!	#DIV/0!	#DIV/0!	#DIV/0!
			#DIV/0!	#DIV/0!	#DIV/0!	#DIV/0!
			#DIV/0!	#DIV/0!	#DIV/0!	#DIV/0!
			#DIV/0!	#DIV/0!	#DIV/0!	#DIV/0!
			#DIV/0!	#DIV/0!	#DIV/0!	#DIV/0!
			#DIV/0!	#DIV/0!	#DIV/0!	#DIV/0!
			#DIV/0!	#DIV/0!	#DIV/0!	#DIV/0!
			#DIV/0!	#DIV/0!	#DIV/0!	#DIV/0!
			#DIV/0!	#DIV/0!	#DIV/0!	#DIV/0!
			#DIV/0!	#DIV/0!	#DIV/0!	#DIV/0!
			#DIV/0!	#DIV/0!	#DIV/0!	#DIV/0!
			#DIV/0!	#DIV/0!	#DIV/0!	#DIV/0!
			#DIV/0!	#DIV/0!	#DIV/0!	#DIV/0!
			#DIV/0!	#DIV/0!	#DIV/0!	#DIV/0!
			#DIV/0!	#DIV/0!	#DIV/0!	#DIV/0!
			#DIV/0!	#DIV/0!	#DIV/0!	#DIV/0!
			#DIV/0!	#DIV/0!	#DIV/0!	#DIV/0!
			#DIV/0!	#DIV/0!	#DIV/0!	#DIV/0!
			#DIV/0!	#DIV/0!	#DIV/0!	#DIV/0!
			#DIV/0!	#DIV/0!	#DIV/0!	#DIV/0!
			#DIV/0!	#DIV/0!	#DIV/0!	#DIV/0!
			#DIV/0!	#DIV/0!	#DIV/0!	#DIV/0!
			#DIV/0!	#DIV/0!	#DIV/0!	#DIV/0!
			#DIV/0!	#DIV/0!	#DIV/0!	#DIV/0!
			#DIV/0!	#DIV/0!	#DIV/0!	#DIV/0!
			#DIV/0!	#DIV/0!	#DIV/0!	#DIV/0!
			#DIV/0!	#DIV/0!	#DIV/0!	#DIV/0!
			#DIV/0!	#DIV/0!	#DIV/0!	#DIV/0!
			#DIV/0!	#DIV/0!	#DIV/0!	#DIV/0!
			#DIV/0!	#DIV/0!	#DIV/0!	#DIV/0!
			#DIV/0!	#DIV/0!	#DIV/0!	#DIV/0!
			#DIV/0!	#DIV/0!	#DIV/0!	#DIV/0!
			#DIV/0!	#DIV/0!	#DIV/0!	#DIV/0!
			#DIV/0!	#DIV/0!	#DIV/0!	#DIV/0!
			#DIV/0!	#DIV/0!	#DIV/0!	#DIV/0!
			#DIV/0!	#DIV/0!	#DIV/0!	#DIV/0!
			#DIV/0!	#DIV/0!	#DIV/0!	#DIV/0!
			#DIV/0!	#DIV/0!	#DIV/0!	#DIV/0!
			#DIV/0!	#DIV/0!	#DIV/0!	#DIV/0!
			#DIV/0!	#DIV/0!	#DIV/0!	#DIV/0!
			#DIV/0!	#DIV/0!	#DIV/0!	#DIV/0!
			#DIV/0!	#DIV/0!	#DIV/0!	#DIV/0!
			#DIV/0!	#DIV/0!	#DIV/0!	#DIV/0!
			#DIV/0!	#DIV/0!	#DIV/0!	#DIV/0!
			#DIV/0!	#DIV/0!	#DIV/0!	#DIV/0!
			#DIV/0!	#DIV/0!	#DIV/0!	#DIV/0!
			#DIV/0!	#DIV/0!	#DIV/0!	#DIV/0!
			#DIV/0!	#DIV/0!	#DIV/0!	#DIV/0!
			#DIV/0!	#DIV/0!	#DIV/0!	#DIV/0!
			#DIV/0!	#DIV/0!	#DIV/0!	#DIV/0!
			#DIV/0!	#DIV/0!	#DIV/0!	#DIV/0!
			#DIV/0!	#DIV/0!	#DIV/0!	#DIV/0!
			#DIV/0!	#DIV/0!	#DIV/0!	#DIV/0!
			#DIV/0!	#DIV/0!	#DIV/0!	#DIV/0!
			#DIV/0!	#DIV/0!	#DIV/0!	#DIV/0!
			#DIV/0!	#DIV/0!	#DIV/0!	#DIV/0!
			#DIV/0!	#DIV/0!	#DIV/0!	#DIV/0!
			#DIV/0!	#DIV/0!	#DIV/0!	#DIV/0!
			#DIV/0!	#DIV/0!	#DIV/0!	#DIV/0!
			#DIV/0!	#DIV/0!	#DIV/0!	#DIV/0!
			#DIV/0!	#DIV/0!	#DIV/0!	#DIV/0!
			#DIV/0!	#DIV/0!	#DIV/0!	#DIV/0!
			#DIV/0!	#DIV/0!	#DIV/0!	#DIV/0!
			#DIV/0!	#DIV/0!	#DIV/0!	#DIV/0!
			#DIV/0!	#DIV/0!	#DIV/0!	#DIV/0!
			#DIV/0!	#DIV/0!	#DIV/0!	#DIV/0!
			#DIV/0!	#DIV/0!	#DIV/0!	#DIV/0!
			#DIV/0!	#DIV/0!	#DIV/0!	#DIV/0!
			#DIV/0!	#DIV/0!	#DIV/0!	#DIV/0!
			#DIV/0!	#DIV/0!	#DIV/0!	#DIV/0!
			#DIV/0!	#DIV/0!	#DIV/0!	#DIV/0!
			#DIV/0!	#DIV/0!	#DIV/0!	#DIV/0!
			#DIV/0!	#DIV/0!	#DIV/0!	#DIV/0!
			#DIV/0!	#DIV/0!	#DIV/0!	#DIV/0!
			#DIV/0!	#DIV/0!	#DIV/0!	#DIV/0!
			#DIV/0!	#DIV/0!	#DIV/0!	#DIV/0!
			#DIV/0!	#DIV/0!	#DIV/0!	#DIV/0!
			#DIV/0!	#DIV/0!	#DIV/0!	#DIV/0!
			#DIV/0!	#DIV/0!	#DIV/0!	#DIV/0!
			#DIV/0!	#DIV/0!	#DIV/0!	#DIV/0!
			#DIV/0!	#DIV/0!	#DIV/0!	#DIV/0!
			#DIV/0!	#DIV/0!	#DIV/0!	#DIV/0!
			#DIV/0!	#DIV/0!	#DIV/0!	#DIV/0!
			#DIV/0!	#DIV/0!	#DIV/0!	#DIV/0!
			#DIV/0!	#DIV/0!	#DIV/0!	#DIV/0!
			#DIV/0!	#DIV/0!	#DIV/0!	#DIV/0!
			#DIV/0!	#DIV/0!	#DIV/0!	#DIV/0!
			#DIV/0!	#DIV/0!	#DIV/0!	#DIV/0!
			#DIV/0!	#DIV/0!	#DIV/0!	#DIV/0!
			#DIV/0!	#DIV/0!	#DIV/0!	#DIV/0!
			#DIV/0!	#DIV/0!	#DIV/0!	#DIV/0!
			#DIV/0!	#DIV/0!	#DIV/0!	#DIV/0!
			#DIV/0!	#DIV/0!	#DIV/0!	#DIV/0!
			#DIV/0!	#DIV/0!	#DIV/0!	#DIV/0!
			#DIV/0!	#DIV/0!	#DIV/0!	#DIV/0!
			#DIV/0!	#DIV/0!	#DIV/0!	#DIV/0!
			#DIV/0!	#DIV/0!	#DIV/0!	#DIV/0!
			#DIV/0!	#DIV/0!	#DIV/0!	#DIV/0!
			#DIV/0!	#DIV/0!	#DIV/0!	#DIV/0!
			#DIV/0!	#DIV/0!	#DIV/0!	#DIV/0!
			#DIV/0!	#DIV/0!	#DIV/0!	#DIV/0!
			#DIV/0!	#DIV/0!	#DIV/0!	#DIV/0!
			#DIV/0!	#DIV/0!	#DIV/0!	#DIV/0!
			#DIV/0!	#DIV/0!	#DIV/0!	#DIV/0!
			#DIV/0!	#DIV/0!	#DIV/0!	#DIV/0!
			#DIV/0!	#DIV/0!	#DIV/0!	#DIV/0!
			#DIV/0!	#DIV/0!	#DIV/0!	#DIV/0!
			#DIV/0!	#DIV/0!	#DIV/0!	#DIV/0!
			#DIV/0!	#DIV/0!	#DIV/0!	#DIV/0!
			#DIV/0!	#DIV/0!	#DIV/0!	#DIV/0!
			#DIV/0!	#DIV/0!	#DIV/0!	#DIV/0!
			#DIV/0!	#DIV/0!	#DIV/0!	#DIV/0!
			#DIV/0!	#DIV/0!	#DIV/0!	#DIV/0!
			#DIV/0!	#DIV/0!	#DIV/0!	#DIV/0!
			#DIV/0!	#DIV/0!	#DIV/0!	#DIV/0!
			#DIV/0!	#DIV/0!	#DIV/0!	#DIV/0!
			#DIV/0!	#DIV/0!	#DIV/0!	#DIV/0!
			#DIV/0!	#DIV/0!	#DIV/0!	#DIV/0!
			#DIV/0!	#DIV/0!	#DIV/0!	#DIV/0!
			#DIV/0!	#DIV/0!	#DIV/0!	#DIV/0!
			#DIV/0!	#DIV/0!	#DIV/0!	#DIV/0!
			#DIV/0!	#DIV/0!	#DIV/0!	#DIV/0!
			#DIV/0!	#DIV/0!	#DIV/0!	#DIV/0!
			#DIV/0!	#DIV/0!	#DIV/0!	#DIV/0!
			#DIV/0!	#DIV/0!	#DIV/0!	#DIV/0!
			#DIV/0!	#DIV/0!	#DIV/0!	#DIV/0!
			#DIV/0!	#DIV/0!	#DIV/0!	#DIV/0!
			#DIV/0!	#DIV/0!	#DIV/0!	#DIV/0!
			#DIV/0!	#DIV/0!	#DIV/0!	#DIV/0!
			#DIV/0!	#DIV/0!	#DIV/0!	#DIV/0!
			#DIV/0!	#DIV/0!	#DIV/0!	#DIV/0!
			#DIV/0!	#DIV/0!	#DIV/0!	#DIV/0!
			#DIV/0!	#DIV/0!	#DIV/0!	#DIV/0!
			#DIV/0!	#DIV/0!	#DIV/0!	#DIV/0!
			#DIV/0!	#DIV/0!	#DIV/0!	#DIV/0!
			#DIV/0!	#DIV/0!	#DIV/0!	#DIV/0!
			#DIV/0!	#DIV/0!	#DIV/0!	#DIV/0!
			#DIV/0!	#DIV/0!	#DIV/0!	#DIV/0!
			#DIV/0!	#DIV/0!	#DIV/0!	#DIV/0!
			#DIV/0!	#DIV/0!	#DIV/0!	#DIV/0!
			#DIV/0!	#DIV/0!	#DIV/0!	#DIV/0!
			#DIV/0!	#DIV/0!	#DIV/0!	#DIV/0!
			#DIV/0!	#DIV/0!	#DIV/0!	#DIV/0!
			#DIV/0!	#DIV/0!	#DIV/0!	#DIV/0!
			#DIV/0!	#DIV/0!	#DIV/0!	#DIV/0!
			#DIV/0!	#DIV/0!	#DIV/0!	#DIV/0!
			#DIV/0!	#DIV/0!	#DIV/0!	#DIV/0!
			#DIV/0!	#DIV/0!	#DIV/0!	#DIV/0!
			#DIV/0!	#DIV/0!	#DIV/0!	#DIV/0!
			#DIV/0!	#DIV/0!	#DIV/0!	#DIV/0!
			#DIV/0!	#DIV/0!	#DIV/0!	#DIV/0!
			#DIV/0!	#DIV/0!	#DIV/0!	#DIV/0!
			#DIV/0!	#DIV/0!	#DIV/0!	#DIV/0!
			#DIV/0!	#DIV/0!	#DIV/0!	#DIV/0!
			#DIV/0!	#DIV/0!	#DIV/0!	#DIV/0!
			#DIV/0!	#DIV/0!	#DIV/0!	#DIV/0!
			#DIV/0!	#DIV/0!	#DIV/0!	#DIV/0!
			#DIV/0!	#DIV/0!	#DIV/0!	#DIV/0!
			#DIV/0!	#DIV/0!	#DIV/0!	#DIV/0!
			#DIV/0!	#DIV/0!	#DIV/0!	#DIV/0!
			#DIV/0!	#DIV/0!	#DIV/0!	#DIV/0!
			#DIV/0!	#DIV/0!	#DIV/0!	#DIV/0!
			#DIV/0!	#DIV/0!	#DIV/0!	#DIV/0!
			#DIV/0!	#DIV/0!	#DIV/0!	#DIV/0!
			#DIV/0!	#DIV/0!	#DIV/0!	#DIV/0!
			#DIV/0!	#DIV/0!	#DIV/0!	#DIV/0!
			#DIV/0!	#DIV/0!	#DIV/0!	#DIV/0!
			#DIV/0!	#DIV/0!	#DIV/0!	#DIV/0!
			#DIV/0!	#DIV/0!	#DIV/0!	#DIV/0!
			#DIV/0!	#DIV/0!	#DIV/0!	#DIV/0!
			#DIV/0!	#DIV/0!	#DIV/0!	#DIV/0!
			#DIV/0!	#DIV/0!	#DIV/0!	#DIV/0!
			#DIV/0!	#DIV/0!	#DIV/0!	#DIV/0!
			#DIV/0!	#DIV/0!	#DIV/0!	#DIV/0!
			#DIV/0!	#DIV/0!	#DIV/0!	#DIV/0!
			#DIV/0!	#DIV/0!	#DIV/0!	#DIV/0!
			#DIV/0!	#DIV/0!	#DIV/0!	#DIV/0!
			#DIV/0!	#DIV/0!	#DIV/0!	#DIV/0!
			#DIV/0!	#DIV/0!	#DIV/0!	#DIV/0!
			#DIV/0!	#DIV/0!	#DIV/0!	#DIV/0!
			#DIV/0!	#DIV/0!	#DIV/0!	#DIV/0!
			#DIV/0!	#DIV/0!	#DIV/0!	#DIV/0!
			#DIV/0!	#DIV/0!	#DIV/0!	#DIV/0!
			#DIV/0!	#DIV/0!	#DIV/0!	#DIV/0!
			#DIV/0!	#DIV/0!	#DIV/0!	#DIV/0!
			#DIV/0!	#DIV/0!	#DIV/0!	#DIV/0!
			#DIV/0!	#DIV/0!	#DIV/0!	#DIV/0!
			#DIV/0!	#DIV/0!	#DIV/0!	#DIV/0!
			#DIV/0!	#DIV/0!	#DIV/0!	#DIV/0!
			#DIV/0!	#DIV/0!	#DIV/0!	#DIV/0!
			#DIV/0!	#DIV/0!	#DIV/0!	#DIV/0!
			#DIV/0!	#DIV/0!	#DIV/0!	#DIV/0!
			#DIV/0!	#DIV/0!	#DIV/0!	#DIV/0!
			#DIV/0!	#DIV/0!	#DIV/0!	#DIV/0!
			#DIV/0!	#DIV/0!	#DIV/0!	#DIV/0!
			#DIV/0!	#DIV/0!	#DIV/0!	#DIV/0!
			#DIV/0!	#DIV/0!	#DIV/0!	#DIV/0!
			#DIV/0!	#DIV/0!	#DIV/0!	#DIV/0!
			#DIV/0!	#DIV/0!	#DIV/0!	#DIV/0!
			#DIV/0!	#DIV/0!	#DIV/0!	#DIV/0!
			#DIV/0!	#DIV/0!	#DIV/0!	#DIV/0!
			#DIV/0!	#DIV/0!	#DIV/0!	#DIV/0!
			#DIV/0!	#DIV/0!	#DIV/0!	#DIV/0!
			#DIV/0!	#DIV/0!	#DIV/0!	#DIV/0!
			#DIV/0!	#DIV/0!	#DIV/0!	#DIV/0!
			#DIV/0!	#DIV/0!	#DIV/0!	#DIV/0!
			#DIV/0!	#DIV/0!	#DIV/0!	#DIV/0!
			#DIV/0!	#DIV/0!	#DIV/0!	#DIV/0!
			#DIV/0!	#DIV/0!	#DIV/0!	#DIV/0!
			#DIV/0!	#DIV/0!	#DIV/0!	#DIV/0!
			#DIV/0!	#DIV/0!	#DIV/0!	#DIV/0!
			#DIV/0!	#DIV/0!	#DIV/0!	#DIV/0!
			#DIV/0!	#DIV/0!	#DIV/0!	#DIV/0!
			#DIV/0!	#DIV/0!	#DIV/0!	#DIV/0!
			#DIV/0!	#DIV/0!	#DIV/0!	#DIV/0!
			#DIV/0!	#DIV/0!	#DIV/0!	#DIV/0!
			#DIV/0!	#DIV/0!	#DIV/0!	#DIV/0!
			#DIV/0!	#DIV/0!	#DIV/0!	#DIV/0!
			#DIV/0!	#DIV/0!	#DIV/0!	#DIV/0!
			#DIV/0!	#DIV/0!	#DIV/0!	#DIV/0!
			#DIV/0!	#DIV/0!	#DIV/0!	#DIV/0!
			#DIV/0!	#DIV/0!	#DIV/0!	#DIV/0!
			#DIV/0!	#DIV/0!	#DIV/0!	#DIV/0!
			#DIV/0!	#DIV/0!	#DIV/0!	#DIV/0!
			#DIV/0!	#DIV/0!	#DIV/0!	#DIV/0!
			#DIV/0!	#DIV/0!	#DIV/0!	#DIV/0!
			#DIV/0!	#DIV/0!	#DIV/0!	#DIV/0!
			#DIV/0!	#DIV/0!	#DIV/0!	#DIV/0!
			#DIV/0!	#DIV/0!	#DIV/0!	#DIV/0!
			#DIV/0!	#DIV/0!	#DIV/0!	#DIV/0!
			#DIV/0!	#DIV/0!	#DIV/0!	#DIV/0!
			#DIV/0!	#DIV/0!	#DIV/0!	#DIV/0!
			#DIV/0!	#DIV/0!	#DIV/0!	#DIV/0!
			#DIV/0!	#DIV/0!	#DIV/0!	#DIV/0!
			#DIV/0!	#DIV/0!	#DIV/0!	#DIV/0!
			#DIV/0!	#DIV/0!	#DIV/0!	#DIV/0!
			#DIV/0!	#DIV/0!	#DIV/0!	#DIV/0!
			#DIV/0!	#DIV/0!	#DIV/0!	#DIV/0!
			#DIV/0!	#DIV/0!	#DIV/0!	#DIV/0!
			#DIV/0!	#DIV/0!	#DIV/0!	#DIV/0!
			#DIV/0!	#DIV/0!	#DIV/0!	#DIV/0!
			#DIV/0!	#DIV/0!	#DIV/0!	#DIV/0!
			#DIV/0!	#DIV/0!	#DIV/0!	#DIV/0!
			#DIV/0!	#DIV/0!	#DIV/0!	#DIV/0!
			#DIV/0!	#DIV/0!	#DIV/0!	#DIV/0!
			#DIV/0!	#DIV/0!	#DIV/0!	#DIV/0!
			#DIV/0!	#DIV/0!	#DIV/0!	#DIV/0!
			#DIV/0!	#DIV/0!	#DIV/0!	#DIV/0!
			#DIV/0!	#DIV/0!	#DIV/0!	#DIV/0!
			#DIV/0!	#DIV/0!	#DIV/0!	#DIV/0!
			#DIV/0!	#DIV/0!	#DIV/0!	#DIV/0!
			#DIV/0!	#DIV/0!	#DIV/0!	#DIV/0!
			#DIV/0!	#DIV/0!	#DIV/0!	#DIV/0!
			#DIV/0!	#DIV/0!	#DIV/0!	#DIV/0!
			#DIV/0!	#DIV/0!	#DIV/0!	#DIV/0!
			#DIV/0!	#DIV/0!	#DIV/0!	#DIV/0!
			#DIV/0!	#DIV/0!	#DIV/0!	#DIV/0!
			#DIV/0!	#DIV/0!	#DIV/0!	#DIV/0!
			#DIV/0!	#DIV/0!	#DIV/0!	#DIV/0!
			#DIV/0!	#DIV/0!	#DIV/0!	#DIV/0!
			#DIV/0!	#DIV/0!	#DIV/0!	#DIV/0!
			#DIV/0!	#DIV/0!	#DIV/0!	#DIV/0!
			#DIV/0!	#DIV/0!	#DIV/0!	#DIV/0!
			#DIV/0!	#DIV/0!	#DIV/0!	#DIV/0!
			#DIV/0!	#DIV/0!	#DIV/0!	#DIV/0!
			#DIV/0!	#DIV/0!	#DIV/0!	#DIV/0!
			#DIV/0!	#DIV/0!	#DIV/0!	#DIV/0!
			#DIV/0!	#DIV/0!	#DIV/0!	#DIV/0!
			#DIV/0!	#DIV/0!	#DIV/0!	#DIV/0!
			#DIV/0!	#DIV/0!	#DIV/0!	#DIV/0!
			#DIV/0!	#DIV/0!	#DIV/0!	#DIV/0!
			#DIV/0!	#DIV/0!	#DIV/0!	#DIV/0!
			#DIV/0!	#DIV/0!	#DIV/0!	#DIV/0!
			#DIV/0!	#DIV/0!	#DIV/0!	#DIV/0!
			#DIV/0!	#DIV/0!	#DIV/0!	#DIV/0!
			#DIV/0!	#DIV/0!	#DIV/0!	#DIV/0!
			#DIV/0!	#DIV/0!	#DIV/0!	#DIV/0!
			#DIV/0!	#DIV/0!	#DIV/0!	#DIV/0!
			#DIV/0!	#DIV/0!	#DIV/0!	#DIV/0!
			#DIV/0!	#DIV/0!	#DIV/0!	#DIV/0!
			#DIV/0!	#DIV/0!	#DIV/0!	#DIV/0!
			#DIV/0!	#DIV/0!	#DIV/0!	#DIV/0!
			#DIV/0!	#DIV/0!	#DIV/0!	#DIV/0!
			#DIV/0!	#DIV/0!	#DIV/0!	#DIV/0!
			#DIV/0!	#DIV/0!	#DIV/0!	#DIV/0!
			#DIV/0!	#DIV/0!	#DIV/0!	#DIV/0!
			#DIV/0!	#DIV/0!	#DIV/0!	#DIV/0!
			#DIV/0!	#DIV/0!	#DIV/0!	#DIV/0!
			#DIV/0!	#DIV/0!	#DIV/0!	#DIV/0!
			#DIV/0!	#DIV/0!	#DIV/0!	#DIV/0!
			#DIV/0!	#DIV/0!	#DIV/0!	#DIV/0!
			#DIV/0!	#DIV/0!	#DIV/0!	#DIV/0!
			#DIV/0!	#DIV/0!	#DIV/0!	#DIV/0!
			#DIV/0!	#DIV/0!	#DIV/0!	#DIV/0!
			#DIV/0!	#DIV/0!	#DIV/0!	#DIV/0!
			#DIV/0!	#DIV/0!	#DIV/0!	#DIV/0!
			#DIV/0!	#DIV/0!	#DIV/0!	#DIV/0!
			#DIV/0!	#DIV/0!	#DIV/0!	#DIV/0!
			#DIV/0!	#DIV/0!	#DIV/0!	#DIV/0!
			#DIV/0!	#DIV/0!	#DIV/0!	#DIV/0!
			#DIV/0!	#DIV/0!	#DIV/0!	#DIV/0!
			#DIV/0!	#DIV/0!	#DIV/0!	#DIV/0!
			#DIV/0!	#DIV/0!	#DIV/0!	#DIV/0!
			#DIV/0!	#DIV/0!	#DIV/0!	#DIV/0!
			#DIV/0!	#DIV/0!	#DIV/0!	#DIV/0!
			#DIV/0!	#DIV/0!	#DIV/0!	#DIV/0!
			#DIV/0!	#DIV/0!	#DIV/0!	#DIV/0!
			#DIV/0!	#DIV/0!	#DIV/0!	#DIV/0!
			#DIV/0!	#DIV/0!	#DIV/0!	#DIV/0!
			#DIV/0!	#DIV/0!	#DIV/0!	#DIV/0!
			#DIV/0!	#DIV/0!	#DIV/0!	#DIV/0!
			#DIV/0!	#DIV/0!	#DIV/0!	#DIV/0!
			#DIV/0!	#DIV/0!	#DIV/0!	#DIV/0!
			#DIV/0!	#DIV/0!	#DIV/0!	#DIV/0!
			#DIV/0!	#DIV/0!	#DIV/0!	#DIV/0!
			#DIV/0!	#DIV/0!	#DIV/0!	#DIV/0!
			#DIV/0!	#DIV/0!	#DIV/0!	#DIV/0!
			#DIV/0!	#DIV/0!	#DIV/0!	#DIV/0!
			#DIV/0!	#DIV/0!	#DIV/0!	#DIV/0!
			#DIV/0!	#DIV/0!	#DIV/0!	#DIV/0!
			#DIV/0!	#DIV/0!	#DIV/0!	#DIV/0!
			#DIV/0!	#DIV/0!	#DIV/0!	#DIV/0!
			#DIV/0!	#DIV/0!	#DIV/0!	#DIV/0!
			#DIV/0!	#DIV/0!	#DIV/0!	#DIV/0!
			#DIV/0!	#DIV/0!	#DIV/0!	#DIV/0!
			#DIV/0!	#DIV/0!	#DIV/0!	#DIV/0!
			#DIV/0!	#DIV/0!	#DIV/0!	#DIV/0!
			#DIV/0!	#DIV/0!	#DIV/0!	#DIV/0!
			#DIV/0!	#DIV/0!	#DIV/0!	#DIV/0!
			#DIV/0!	#DIV/0!	#DIV/0!	#DIV/0!
			#DIV/0!	#DIV/0!	#DIV/0!	#DIV/0!
			#DIV/0!	#DIV/0!	#DIV/0!	#DIV/0!
			#DIV/0!	#DIV/0!	#DIV/0!	#DIV/0!
			#DIV/0!	#DIV/0!	#DIV/0!	#DIV/0!
			#DIV/0!	#DIV/0!	#DIV/0!	#DIV/0!
			#DIV/0!	#DIV/0!	#DIV/0!	#DIV/0!
			#DIV/0!	#DIV/0!	#DIV/0!	#DIV/0!
			#DIV/0!	#DIV/0!	#DIV/0!	#DIV/0!
			#DIV/0!	#DIV/0!	#DIV/0!	#DIV/0!
			#DIV/0!	#DIV/0!	#DIV/0!	#DIV/0!
			#DIV/0!	#DIV/0!	#DIV/0!	#DIV/0!
			#DIV/0!	#DIV/0!	#DIV/0!	#DIV/0!
			#DIV/0!	#DIV/0!	#DIV/0!	#DIV/0!
			#DIV/0!	#DIV/0!	#DIV/0!	#DIV/0!
			#DIV/0!	#DIV/0!	#DIV/0!	#DIV/0!
			#DIV/0!	#DIV/0!	#DIV/0!	#DIV/0!
			#DIV/0!	#DIV/0!	#DIV/0!	#DIV/0!
			#DIV/0!	#DIV/0!	#DIV/0!	#DIV/0!
			#DIV/0!	#DIV/0!	#DIV/0!	#DIV/0!
			#DIV/0!	#DIV/0!	#DIV/0!	#DIV/0!
			#DIV/0!	#DIV/0!	#DIV/0!	#DIV/0!
			#DIV/0!	#DIV/0!	#DIV/0!	#DIV/0!
			#DIV/0!	#DIV/0!	#DIV/0!	#DIV/0!
			#DIV/0!	#DIV/0!	#DIV/0!	#DIV/0!
			#DIV/0!	#DIV/0!	#DIV/0!	#DIV/0!
			#DIV/0!	#DIV/0!	#DIV/0!	#DIV/0!
			#DIV/0!	#DIV/0!	#DIV/0!	#DIV/0!
			#DIV/0!	#DIV/0!	#DIV/0!	#DIV/0!
			#DIV/0!	#DIV/0!	#DIV/0!	#DIV/0!
			#DIV/0!	#DIV/0!	#DIV/0!	#DIV/0!
			#DIV/0!	#DIV/0!	#DIV/0!	#DIV/0!
			#DIV/0!	#DIV/0!	#DIV/0!	#DIV/0!
			#DIV/0!	#DIV/0!	#DIV/0!	#DIV/0!
			#DIV/0!	#DIV/0!	#DIV/0!	#DIV/0!
			#DIV/0!	#DIV/0!	#DIV/0!	#DIV/0!
			#DIV/0!	#DIV/0!	#DIV/0!	#DIV/0!
			#DIV/0!	#DIV/0!	#DIV/0!	#DIV/0!
			#DIV/0!	#DIV/0!	#DIV/0!	#DIV/0!
			#DIV/0!	#DIV/0!	#DIV/0!	#DIV/0!
			#DIV/0!	#DIV/0!	#DIV/0!	#DIV/0!
			#DIV/0!	#DIV/0!	#DIV/0!	#DIV/0!
			#DIV/0!	#DIV/0!	#DIV/0!	#DIV/0!
			#DIV/0!	#DIV/0!	#DIV/0!	#DIV/0!
			#DIV/0!	#DIV/0!	#DIV/0!	#DIV/0!
			#DIV/0!	#DIV/0!	#DIV/0!	#DIV/0!
			#DIV/0!	#DIV/0!	#DIV/0!	#DIV/0!
			#DIV/0!	#DIV/0!	#DIV/0!	#DIV/0!
			#DIV/0!	#DIV/0!	#DIV/0!	#DIV/0!
			#DIV/0!	#DIV/0!	#DIV/0!	#DIV/0!
			#DIV/0!	#DIV/0!	#DIV/0!	#DIV/0!
			#DIV/0!	#DIV/0!	#DIV/0!	#DIV/0!
			#DIV/0!	#DIV/0!	#DIV/0!	#DIV/0!
			#DIV/0!	#DIV/0!	#DIV/0!	#DIV/0!
			#DIV/0!	#DIV/0!	#DIV/0!	#DIV/0!
			#DIV/0!	#DIV/0!	#DIV/0!	#DIV/0!
			#DIV/0!	#DIV/0!	#DIV/0!	#DIV/0!
			#DIV/0!	#DIV/0!	#DIV/0!	#DIV/0!
			#DIV/0!	#DIV/0!	#DIV/0!	#DIV/0!
			#DIV/0!	#DIV/0!	#DIV/0!	#DIV/0!
			#DIV/0!	#DIV/0!	#DIV/0!	#DIV/0!
			#DIV/0!	#DIV/0!	#DIV/0!	#DIV/0!
			#DIV/0!	#DIV/0!	#DIV/0!	#DIV/0!
			#DIV/0!	#DIV/0!	#DIV/0!	#DIV/0!
			#DIV/0!	#DIV/0!	#DIV/0!	#DIV/0!
			#DIV/0!	#DIV/0!	#DIV/0!	#DIV/0!
			#DIV/0!	#DIV/0!	#DIV/0!	#DIV/0!
			#DIV/0!	#DIV/0!	#DIV/0!	#DIV/0!
			#DIV/0!	#DIV/0!	#DIV/0!	#DIV/0!
			#DIV/0!	#DIV/0!	#DIV/0!	#DIV/0!
			#DIV/0!	#DIV/0!	#DIV/0!	#DIV/0!
			#DIV/0!	#DIV/0!	#DIV/0!	#DIV/0!
			#DIV/0!	#DIV/0!	#DIV/0!	#DIV/0!
			#DIV/0!	#DIV/0!	#DIV/0!	#DIV/0!
			#DIV/0!	#DIV/0!	#DIV/0!	#DIV/0!
			#DIV/0!	#DIV/0!	#DIV/0!	#DIV/0!
			#DIV/0!	#DIV/0!	#DIV/0!	#DIV/0!
			#DIV/0!	#DIV/0!	#DIV/0!	#DIV/0!
			#DIV/0!	#DIV/0!	#DIV/0!	#DIV/0!
			#DIV/0!	#DIV/0!	#DIV/0!	#DIV/0!
			#DIV/0!	#DIV/0!	#DIV/0!	#DIV/0!
			#DIV/0!	#DIV/0!	#DIV/0!	#DIV/0!
			#DIV/0!	#DIV/0!	#DIV/0!	#DIV/0!
			#DIV/0!	#DIV/0!	#DIV/0!	#DIV/0!
			#DIV/0!	#DIV/0!	#DIV/0!	#DIV/0!
			#DIV/0!	#DIV/0!	#DIV/0!	#DIV/0!
			#DIV/0!	#DIV/0!	#DIV/0!	#DIV/0!
			#DIV/0!	#DIV/0!	#DIV/0!	#DIV/0!
			#DIV/0!	#DIV/0!	#DIV/0!	#DIV/0!
			#DIV/0!	#DIV/0!	#DIV/0!	#DIV/0!
			#DIV/0!	#DIV/0!	#DIV/0!	#DIV/0!
			#DIV/0!	#DIV/0!	#DIV/0!	#DIV/0!
			#DIV/0!	#DIV/0!	#DIV/0!	#DIV/0!
			#DIV/0!	#DIV/0!	#DIV/0!	#DIV/0!
			#DIV/0!	#DIV/0!	#DIV/0!	#DIV/0!
			#DIV/0!	#DIV/0!	#DIV/0!	#DIV/0!
			#DIV/0!	#DIV/0!	#DIV/0!	#DIV/0!
			#DIV/0!	#DIV/0!	#DIV/0!	#DIV/0!
			#DIV/0!	#DIV/0!	#DIV/0!	#DIV/0!
			#DIV/0!	#DIV/0!	#DIV/0!	#DIV/0!
			#DIV/0!	#DIV/0!	#DIV/0!	#DIV/0!
			#DIV/0!	#DIV/0!	#DIV/0!	#DIV/0!
			#DIV/0!	#DIV/0!	#DIV/0!	#DIV/0!
			#DIV/0!	#DIV/0!	#DIV/0!	#DIV/0!
			#DIV/0!	#DIV/0!	#DIV/0!	#DIV/0!
			#DIV/0!	#DIV/0!	#DIV/0!	#DIV/0!
			#DIV/0!	#DIV/0!	#DIV/0!	#DIV/0!
			#DIV/0!	#DIV/0!	#DIV/0!	#DIV/0!
			#DIV/0!	#DIV/0!	#DIV/0!	#DIV/0!
			#DIV/0!	#DIV/0!	#DIV/0!	#DIV/0!
			#DIV/0!	#DIV/0!	#DIV/0!	#DIV/0!
			#DIV/0!	#DIV/0!	#DIV/0!	#DIV/0!
			#DIV/0!	#DIV/0!	#DIV/0!	#DIV/0!
			#DIV/0!	#DIV/0!	#DIV/0!	#DIV/0!
			#DIV/0!	#DIV/0!	#DIV/0!	#DIV/0!
			#DIV/0!	#DIV/0!	#DIV/0!	#DIV/0!
			#DIV/0!	#DIV/0!	#DIV/0!	#DIV/0!
			#DIV/0!	#DIV/0!	#DIV/0!	#DIV/0!
			#DIV/0!	#DIV/0!	#DIV/0!	#DIV/0!
			#DIV/0!	#DIV/0!	#DIV/0!	#DIV/0!
			#DIV/0!	#DIV/0!	#DIV/0!	#DIV/0!
			#DIV/0!	#DIV/0!	#DIV/0!	#DIV/0!
			#DIV/0!	#DIV/0!	#DIV/0!	#DIV/0!
			#DIV/0!	#DIV/0!	#DIV/0!	#DIV/0!
			#DIV/0!	#DIV/0!	#DIV/0!	#DIV/0!
			#DIV/0!	#DIV/0!	#DIV/0!	#DIV/0!
			#DIV/0!	#DIV/0!	#DIV/0!	#DIV/0!
			#DIV/0!	#DIV/0!	#DIV/0!	#DIV/0!
			#DIV/0!	#DIV/0!	#DIV/0!	#DIV/0!
			#DIV/0!	#DIV/0!	#DIV/0!	#DIV/0!
			#DIV/0!	#DIV/0!	#DIV/0!	#DIV/0!
			#DIV/0!	#DIV/0!	#DIV/0!	#DIV/0!
			#DIV/0!	#DIV/0!	#DIV/0!	#DIV/0!
			#DIV/0!	#DIV/0!	#DIV/0!	#DIV/0!
			#DIV/0!	#DIV/0!	#DIV/0!	#DIV/0!
			#DIV/0!	#DIV/0!	#DIV/0!	#DIV/0!
			#DIV/0!	#DIV/0!	#DIV/0!	#DIV/0!
			#DIV/0!	#DIV/0!	#DIV/0!	#DIV/0!
			#DIV/0!	#DIV/0!	#DIV/0!	#DIV/0!
			#DIV/0!	#DIV/0!	#DIV/0!	#DIV/0!
			#DIV/0!	#DIV/0!	#DIV/0!	#DIV/0!
			#DIV/0!	#DIV/0!	#DIV/0!	#DIV/0!
			#DIV/0!	#DIV/0!	#DIV/0!	#DIV/0!
			#DIV/0!	#DIV/0!	#DIV/0!	#DIV/0!
			#DIV/0!	#DIV/0!	#DIV/0!	#DIV/0!
			#DIV/0!	#DIV/0!	#DIV/0!	#DIV/0!
			#DIV/0!	#DIV/0!	#DIV/0!	#DIV/0!
			#DIV/0!	#DIV/0!	#DIV/0!	#DIV/0!
			#DIV/0!	#DIV/0!	#DIV/0!	#DIV/0!
			#DIV/0!	#DIV/0!	#DIV/0!	#DIV/0!
			#DIV/0!	#DIV/0!	#DIV/0!	#DIV/0!
			#DIV/0!	#DIV/0!	#DIV/0!	#DIV/0!
			#DIV/0!	#DIV/0!	#DIV/0!	#DIV/0!
			#DIV/0!	#DIV/0!	#DIV/0!	#DIV/0!
			#DIV/0!	#DIV/0!	#DIV/0!	#DIV/0!
			#DIV/0!	#DIV/0!	#DIV/0!	#DIV/0!
			#DIV/0!	#DIV/0!	#DIV/0!	#DIV/0!
			#DIV/0!	#DIV/0!	#DIV/0!	#DIV/0!
			#DIV/0!	#DIV/0!	#DIV/0!	#DIV/0!
			#DIV/0!	#DIV/0!	#DIV/0!	#DIV/0!
			#DIV/0!	#DIV/0!	#DIV/0!	#DIV/0!
			#DIV/0!	#DIV/0!	#DIV/0!	#DIV/0!
			#DIV/0!	#DIV/0!	#DIV/0!	#DIV/0!
			#DIV/0!	#DIV/0!	#DIV/0!	#DIV/0!
			#DIV/0!	#DIV/0!	#DIV/0!	#DIV/0!
			#DIV/0!	#DIV/0!	#DIV/0!	#DIV/0!
			#DIV/0!	#DIV/0!	#DIV/0!	#DIV/0!
			#DIV/0!	#DIV/0!	#DIV/0!	#DIV/0!
			#DIV/0!	#DIV/0!	#DIV/0!	#DIV/0!
			#DIV/0!	#DIV/0!	#DIV/0!	#DIV/0!
			#DIV/0!	#DIV/0!	#DIV/0!	#DIV/0!
			#DIV/0!	#DIV/0!	#DIV/0!	#DIV/0!
			#DIV/0!	#DIV/0!	#DIV/0!	#DIV/0!
			#DIV/0!	#DIV/0!	#DIV/0!	#DIV/0!
			#DIV/0!	#DIV/0!	#DIV/0!	#DIV/0!
			#DIV/0!	#DIV/0!	#DIV/0!	#DIV/0!
			#DIV/0!	#DIV/0!	#DIV/0!	#DIV/0!
			#DIV/0!	#DIV/0!	#DIV/0!	#DIV/0!
			#DIV/0!	#DIV/0!	#DIV/0!	#DIV/0!
			#DIV/0!	#DIV/0!	#DIV/0!	#DIV/0!
			#DIV/0!	#DIV/0!	#DIV/0!	#DIV/0!
			#DIV/0!	#DIV/0!	#DIV/0!	#DIV/0!
			#DIV/0!	#DIV/0!	#DIV/0!	#DIV/0!
			#DIV/0!	#DIV/0!	#DIV/0!	#DIV/0!
			#DIV/0!	#DIV/0!	#DIV/0!	#DIV/0!
			#DIV/0!	#DIV/0!	#DIV/0!	#DIV/0!
			#DIV/0!	#DIV/0!	#DIV/0!	#DIV/0!
			#DIV/0!	#DIV/0!	#DIV/0!	#DIV/0!
			#DIV/0!	#DIV/0!	#DIV/0!	#DIV/0!
			#DIV/0!	#DIV/0!	#DIV/0!	#DIV/0!
			#DIV/0!	#DIV/0!	#DIV/0!	#DIV/0!
			#DIV/0!	#DIV/0!	#DIV/0!	#DIV/0!
			#DIV/0!	#DIV/0!	#DIV/0!	#DIV/0!
			#DIV/0!	#DIV/0!	#DIV/0!	#DIV/0!
			#DIV/0!	#DIV/0!	#DIV/0!	#DIV/0!
			#DIV/0!	#DIV/0!	#DIV/0!	#DIV/0!
[truncated: 1,046,576+ more rows]

## Sheet: Differential Phyla abundance
Name	15MP vs. 15C - Max group mean	15MP vs. 15C - Log₂ fold change	15MP vs. 15C - Fold change	15MP vs. 15C - P-value	15MP vs. 15C - FDR p-value	15MP vs. 15C - Bonferroni	9C vs. 15C - Max group mean	9C vs. 15C - Log₂ fold change	9C vs. 15C - Fold change	9C vs. 15C - P-value	9C vs. 15C - FDR p-value	9C vs. 15C - Bonferroni	9C vs. 15MP - Max group mean	9C vs. 15MP - Log₂ fold change	9C vs. 15MP - Fold change	9C vs. 15MP - P-value	9C vs. 15MP - FDR p-value	9C vs. 15MP - Bonferroni	9MP vs. 15C - Max group mean	9MP vs. 15C - Log₂ fold change	9MP vs. 15C - Fold change	9MP vs. 15C - P-value	9MP vs. 15C - FDR p-value	9MP vs. 15C - Bonferroni	9MP vs. 15MP - Max group mean	9MP vs. 15MP - Log₂ fold change	9MP vs. 15MP - Fold change	9MP vs. 15MP - P-value	9MP vs. 15MP - FDR p-value	9MP vs. 15MP - Bonferroni	9MP vs. 9C - Max group mean	9MP vs. 9C - Log₂ fold change	9MP vs. 9C - Fold change	9MP vs. 9C - P-value	9MP vs. 9C - FDR p-value	9MP vs. 9C - Bonferroni
Actinobacteria	351.833	-7.26961	-154.302	6.92092e-06	2.42232e-05	4.84464e-05	351.833	-1.67454	-3.19218	0.275104	0.385146	1	121.167	5.59507	48.3375	0.000541485	0.00126346	0.00379039	434	0.503564	1.41771	0.742663	0.742663	1	434	7.77317	218.755	1.52635e-06	3.56148e-06	1.06844e-05	434	2.1781	4.52559	0.15571	0.454298	1
Bacteroidetes	1548	2.29567	4.90981	0.00708864	0.0165402	0.0496205	1996.67	2.43558	5.40982	0.0042702	0.00747285	0.0298914	1996.67	0.139915	1.10184	0.869554	0.969641	1	6113.67	4.51889	22.9257	1.14497e-07	2.6716e-07	8.01481e-07	6113.67	2.22323	4.66936	0.00906178	0.0158581	0.0634325	6113.67	2.08331	4.23779	0.0144414	0.10109	0.10109
Cyanobacteria	118.5	-0.551895	-1.46601	0.552922	0.645075	1	171.833	0.342177	1.26767	0.71165	0.71165	1	171.833	0.894071	1.85841	0.336047	0.470466	1	255.333	1.38464	2.61106	0.134587	0.188422	0.942109	255.333	1.93653	3.82784	0.0371288	0.043317	0.259902	255.333	1.04246	2.05973	0.259599	0.454298	1
Firmicutes	0.833333	-0.30275	-1.23349	0.777801	0.777801	1	5345.67	12.1531	4554.49	0	0	0	5345.67	12.4558	5617.93	0	0	0	4025.17	12.2347	4819.69	0	0	0	4025.17	12.5375	5945.06	0	0	0	5345.67	0.0816525	1.05823	0.890868	0.977595	1
Planctomycetes	4.66667	-0.758836	-1.69213	0.512986	0.645075	1	2457	8.65874	404.147	1.33227e-15	4.66294e-15	9.32587e-15	2457	9.41757	683.868	1.11022e-16	3.88578e-16	7.77156e-16	774	7.45967	176.03	5.83322e-12	2.04163e-11	4.08326e-11	774	8.21851	297.864	3.26406e-13	1.14242e-12	2.28484e-12	2457	-1.19906	-2.29591	0.253342	0.454298	1
Proteobacteria	60871.5	0.892054	1.85582	0.101581	0.177766	0.711066	60871.5	-0.421748	-1.33955	0.438896	0.512045	1	60786	-1.3138	-2.48596	0.015896	0.027818	0.111272	60871.5	-0.43705	-1.35383	0.422472	0.492884	1	53003.3	-1.3291	-2.51247	0.014713	0.0205982	0.102991	60786	-0.0153019	-1.01066	0.977595	0.977595	1
Verrucomicrobia	489	-11.9756	-4027.21	2.08294e-07	1.45806e-06	1.45806e-06	489	-11.8701	-3743.3	3.1507e-08	7.35163e-08	2.20549e-07	0	0.105466	1.07584	0.969641	0.969641	1	489	-11.755	-3456.2	4.34825e-07	7.60944e-07	3.04377e-06	0	0.22059	1.16521	0.939647	0.939647	1	0	0.115124	1.08307	0.967057	0.977595	1

## Sheet: Differential Genera abundance
Name	15MP vs. 15C - Max group mean	15MP vs. 15C - Log₂ fold change	15MP vs. 15C - Fold change	15MP vs. 15C - P-value	15MP vs. 15C - FDR p-value	15MP vs. 15C - Bonferroni	9C vs. 15C - Max group mean	9C vs. 15C - Log₂ fold change	9C vs. 15C - Fold change	9C vs. 15C - P-value	9C vs. 15C - FDR p-value	9C vs. 15C - Bonferroni	9C vs. 15MP - Max group mean	9C vs. 15MP - Log₂ fold change	9C vs. 15MP - Fold change	9C vs. 15MP - P-value	9C vs. 15MP - FDR p-value	9C vs. 15MP - Bonferroni	9MP vs. 15C - Max group mean	9MP vs. 15C - Log₂ fold change	9MP vs. 15C - Fold change	9MP vs. 15C - P-value	9MP vs. 15C - FDR p-value	9MP vs. 15C - Bonferroni	9MP vs. 15MP - Max group mean	9MP vs. 15MP - Log₂ fold change	9MP vs. 15MP - Fold change	9MP vs. 15MP - P-value	9MP vs. 15MP - FDR p-value	9MP vs. 15MP - Bonferroni	9MP vs. 9C - Max group mean	9MP vs. 9C - Log₂ fold change	9MP vs. 9C - Fold change	9MP vs. 9C - P-value	9MP vs. 9C - FDR p-value	9MP vs. 9C - Bonferroni
Leifsonia	351.833	-6.65179	-100.552	1.15691e-05	0.000112166	0.000717283	351.833	-1.97752	-3.93815	0.155491	0.175281	1	121.167	4.67428	25.5327	0.00205463	0.00374668	0.127387	434	0.100383	1.07206	0.942485	0.942485	1	434	6.75218	107.797	8.40077e-06	2.8936e-05	0.000520848	434	2.0779	4.22193	0.135258	0.349417	1
Ekhidna	485.667	6.8432	114.817	2.43476e-05	0.000150955	0.00150955	38.3333	2.8339	7.12999	0.080825	0.0982579	1	485.667	-4.0093	-16.1034	0.00886763	0.0147944	0.549793	32.5	3.09979	8.57297	0.0561439	0.0696184	1	485.667	-3.7434	-13.393	0.0145328	0.0237114	0.901032	38.3333	0.265893	1.20238	0.862366	0.975935	1
uncultured-1	16.1667	6.5038	90.7484	0.000968978	0.00316193	0.0600766	2.66667	3.23788	9.43406	0.10273	0.120175	1	16.1667	-3.26592	-9.61923	0.00408228	0.00723147	0.253101	113	8.56722	379.308	1.16126e-05	2.57137e-05	0.000719984	113	2.06342	4.17977	0.0568176	0.0800612	1	113	5.32935	40.2062	1.47555e-06	4.57422e-05	9.14844e-05
Arsenicibacter	393.833	1.52496	2.87778	0.0349998	0.0803698	1	739.833	1.34094	2.53317	0.0631235	0.0798706	1	739.833	-0.184011	-1.13604	0.798095	0.853137	1	3993.83	4.01112	16.1238	2.6817e-08	1.18761e-07	1.66265e-06	3993.83	2.48617	5.60287	0.000544778	0.00105551	0.0337762	3993.83	2.67018	6.36507	0.000197268	0.00203844	0.0122306
Flectobacillus	25.3333	3.43663	10.8275	0.00139564	0.00432649	0.0865298	296.167	5.89603	59.5501	2.43842e-08	9.44886e-08	1.51182e-06	296.167	2.4594	5.49988	0.00930615	0.0147944	0.576981	944.5	8.04373	263.878	2.68674e-14	5.5526e-13	1.66578e-12	944.5	4.6071	24.371	1.09258e-06	5.645e-06	6.774e-05	944.5	2.14769	4.43119	0.020143	0.104072	1
Runella	101.167	4.77884	27.452	6.23427e-05	0.000307396	0.00386525	197.833	5.20244	36.8206	1.18829e-05	2.37659e-05	0.000736743	197.833	0.423602	1.34127	0.695904	0.772504	1	118.667	4.54207	23.297	0.000132486	0.000256692	0.00821414	118.667	-0.236766	-1.17835	0.827176	0.840736	1	197.833	-0.660368	-1.58049	0.540204	0.74428	1
Fluviicola	93.5	-1.5228	-2.87349	0.109646	0.226601	1	396	-0.490624	-1.40505	0.60405	0.634764	1	396	1.03218	2.04511	0.277621	0.358594	1	452.167	0.136513	1.09924	0.885254	0.899766	1	452.167	1.65932	3.15867	0.0808883	0.111446	1	452.167	0.627137	1.5445	0.506829	0.730776	1
Chryseobacterium	434.5	1.85556	3.61891	0.201578	0.367584	1	159.167	0.267465	1.20369	0.853862	0.867859	1	434.5	-1.58809	-3.00651	0.273207	0.358594	1	322.833	1.48394	2.79712	0.30668	0.339539	1	434.5	-0.371614	-1.2938	0.797592	0.824178	1	322.833	1.21648	2.32379	0.400876	0.618126	1
Nubsella	3.5	4.14907	17.7416	0.000944731	0.00316193	0.0585733	166.667	7.87705	235.087	8.0456e-11	5.54252e-10	4.98827e-09	166.667	3.72799	13.2506	1.24261e-08	6.42017e-08	7.7042e-07	136.167	7.86392	232.958	8.68802e-11	6.73321e-10	5.38657e-09	136.167	3.71486	13.1306	1.41532e-08	8.775e-08	8.775e-07	166.667	-0.0131275	-1.00914	0.981576	0.981576	1
Azolla filiculoides	118.5	-0.132329	-1.09606	0.836716	0.954834	1	171.833	0.0315464	1.02211	0.960218	0.960218	1	171.833	0.163876	1.12029	0.796583	0.853137	1	255.333	0.899898	1.86593	0.154349	0.18056	1	255.333	1.03223	2.04518	0.104095	0.140302	1	255.333	0.868351	1.82558	0.164966	0.398696	1
Clostridium sensu stricto 13	0.833333	-0.685567	-1.60833	0.549703	0.766	1	5345.67	11.0218	2079.24	0	0	0	5345.67	11.7074	3344.11	0	0	0	4025.17	10.7159	1681.88	0	0	0	4025.17	11.4014	2705.02	0	0	0	5345.67	-0.305981	-1.23626	0.62094	0.808054	1
SH-PL14	4.66667	-0.262856	-1.19985	0.778113	0.954834	1	2457	8.51161	364.963	0	0	0	2457	8.77446	437.902	0	0	0	774	6.98124	126.347	0	0	0	774	7.2441	151.597	0	0	0	2457	-1.53036	-2.88859	0.0275014	0.118138	1
Brevundimonas	114.667	-3.52622	-11.5212	0.00888558	0.0262336	0.550906	114.667	-5.56207	-47.2443	3.13487e-05	5.88976e-05	0.00194362	9	-2.03585	-4.10064	0.140696	0.193849	1	114.667	-4.44484	-21.7786	0.000741579	0.00114945	0.0459779	9	-0.918623	-1.89031	0.500675	0.585696	1	6.33333	1.11723	2.1693	0.40876	0.618126	1
Reyranella	219.5	-0.924414	-1.89791	0.390372	0.636923	1	219.5	-3.2605	-9.58317	0.00241659	0.00374572	0.149829	84.1667	-2.33609	-5.04932	0.0304038	0.0428417	1	219.5	-0.962559	-1.94876	0.368504	0.393918	1	132	-0.0381446	-1.02679	0.971687	0.971687	1	132	2.29794	4.91757	0.0322718	0.125053	1
Bosea	102.333	-2.11346	-4.32729	0.000535557	0.00196939	0.0332045	205.5	0.242183	1.18278	0.673706	0.696163	1	205.5	2.35565	5.11823	9.59196e-05	0.000205069	0.00594702	102.333	-0.669882	-1.59094	0.245607	0.276867	1	86.3333	1.44358	2.71995	0.017139	0.0272467	1	205.5	-0.912065	-1.88174	0.109603	0.308882	1
Devosia	11.3333	0.186365	1.13789	0.814134	0.954834	1	79.1667	2.12429	4.3599	0.00428657	0.00632779	0.265767	79.1667	1.93793	3.83155	0.00922633	0.0147944	0.572033	42.1667	1.38317	2.60842	0.0639158	0.0762073	1	42.1667	1.19681	2.29232	0.109194	0.144043	1	79.1667	-0.74112	-1.67147	0.286236	0.537776	1
Ambiguous_taxa-1	123.667	-1.2362	-2.35577	0.0619073	0.132354	1	137.333	-1.14643	-2.21365	0.0783865	0.0971993	1	137.333	0.0897716	1.0642	0.891784	0.92151	1	123.667	-3.24601	-9.4874	8.52717e-07	2.45465e-06	5.28685e-05	38.6667	-2.00981	-4.0273	0.00261553	0.00463322	0.162163	137.333	-2.09958	-4.28586	0.00139651	0.0108229	0.0865834
Allorhizobium-Neorhizobium-Pararhizobium-Rhizobium	92.6667	-0.454913	-1.3707	0.51076	0.753979	1	465.5	1.82179	3.53521	0.00713318	0.0102851	0.442257	465.5	2.27671	4.84571	0.000865096	0.00167612	0.0536359	473.833	1.94261	3.844	0.00411937	0.00580456	0.255401	473.833	2.39752	5.26897	0.000451987	0.000918295	0.0280232	473.833	0.120813	1.08735	0.856629	0.975935	1
Ensifer	295.667	-3.18081	-9.06814	0.000539994	0.00196939	0.0334797	1836.17	2.24118	4.72783	0.0123891	0.0166983	0.768122	1836.17	5.42198	42.8726	3.39966e-09	2.10779e-08	2.10779e-07	594.667	0.702167	1.62695	0.433432	0.455471	1	594.667	3.88297	14.7534	2.31418e-05	6.83235e-05	0.00143479	1836.17	-1.53901	-2.90595	0.0852721	0.264343	1
Afipia	117.333	-0.882488	-1.84355	0.149383	0.28943	1	117.333	-2.40108	-5.28199	7.33955e-05	0.000130015	0.00455052	81.8333	-1.51859	-2.86511	0.0132173	0.0204868	0.819473	117.333	-2.14743	-4.43039	0.000388543	0.000688275	0.0240896	81.8333	-1.26495	-2.40318	0.0389326	0.0561353	1	50	0.253647	1.19222	0.675567	0.854799	1
Ambiguous_taxa-2	174.833	-1.87738	-3.67407	0.0240893	0.0597415	1	598.5	1.27009	2.41176	0.118203	0.135715	1	598.5	3.14747	8.86099	0.000144727	0.000289455	0.00897309	1208.67	2.48366	5.59315	0.00224344	0.00323473	0.139093	1208.67	4.36104	20.5497	1.39163e-07	7.84372e-07	8.62809e-06	1208.67	1.21357	2.31911	0.133419	0.349417	1
Gemmobacter	573.333	-11.3184	-2553.82	6.52177e-08	2.02175e-06	4.0435e-06	573.333	-3.33754	-10.1088	0.00321705	0.00486481	0.199457	81.8333	7.9809	252.634	0.000139388	0.000288069	0.00864207	573.333	-2.51047	-5.69805	0.0265788	0.0336303	1	114.833	8.80797	448.191	2.61244e-05	7.36234e-05	0.00161971	114.833	0.827066	1.77407	0.465485	0.687145	1
Loktanella	144.5	-9.50862	-728.416	1.26639e-05	0.000112166	0.00078516	144.5	-10.544	-1493	1.29312e-07	4.21964e-07	8.01732e-06	0	-1.03538	-2.04965	0.697466	0.772504	1	144.5	-8.45345	-350.543	2.20809e-08	1.05313e-07	1.36902e-06	0.5	1.05517	2.07796	0.649427	0.701632	1	0.5	2.09055	4.25911	0.331432	0.569244	1
Pseudorhodobacter	191	-9.66336	-810.889	7.61157e-06	9.43835e-05	0.000471918	191	-10.6941	-1656.68	6.397e-08	2.20341e-07	3.96614e-06	0	-1.03072	-2.04305	0.697094	0.772504	1	191	-10.9095	-1923.48	4.97463e-07	1.71348e-06	3.08427e-05	0	-1.24614	-2.37207	0.655659	0.701632	1	0	-0.215423	-1.16104	0.93538	0.975935	1
Roseobacter	152.333	-9.5948	-773.257	2.30648e-05	0.000150955	0.00143002	152.333	-10.6609	-1618.97	3.41419e-07	9.62181e-07	2.1168e-05	0	-1.06606	-2.09371	0.696862	0.772504	1	152.333	-7.68402	-205.646	5.98638e-07	1.95345e-06	3.71156e-05	1.16667	1.91078	3.76013	0.414666	0.494409	1	1.16667	2.97684	7.87261	0.170651	0.398696	1
Novispirillum	54.3333	7.88032	235.62	6.44539e-05	0.000307396	0.00399614	125.5	9.02818	522.1	4.33748e-06	9.96014e-06	0.000268924	125.5	1.14786	2.21586	0.290364	0.367399	1	355.667	10.445	1394.01	1.0581e-07	4.10012e-07	6.56019e-06	355.667	2.56471	5.91636	0.0180931	0.0280442	1	355.667	1.41685	2.67001	0.18629	0.398696	1
Ellin6055	161	0.328926	1.25608	0.542507	0.766	1	101.667	-2.81368	-7.03077	2.25666e-07	6.73465e-07	1.39913e-05	161	-3.14261	-8.8312	7.53073e-09	4.24459e-08	4.66905e-07	101.667	-1.89468	-3.71839	0.000441627	0.000745046	0.0273809	161	-2.2236	-4.67059	3.76514e-05	9.72661e-05	0.00233439	53.3333	0.919005	1.89081	0.0905301	0.267279	1
Novosphingobium	153.167	0.114367	1.0825	0.835764	0.954834	1	122	-2.45759	-5.49298	8.35979e-06	1.72769e-05	0.000518307	153.167	-2.57196	-5.94615	3.29208e-06	1.02054e-05	0.000204109	122	-1.93137	-3.81416	0.000444624	0.000745046	0.0275667	153.167	-2.04573	-4.12883	0.000206534	0.000441555	0.0128051	53.5	0.526223	1.44015	0.33971	0.569244	1
Desulfovibrio	0.166667	-1.49262	-2.81399	0.489381	0.740039	1	835	9.9354	979.159	2.77556e-15	2.86808e-14	1.72085e-13	835	11.428	2755.35	1.40545e-09	9.68201e-09	8.71381e-08	54.6667	6.38716	83.7003	3.97304e-07	1.44899e-06	2.46329e-05	54.6667	7.87978	235.532	3.02725e-05	8.1604e-05	0.00187689	835	-3.54824	-11.6984	3.71211e-07	2.30151e-05	2.30151e-05
{Unknown Order} Gammaproteobacteria	314.833	0.437217	1.35399	0.555968	0.766	1	314.833	-4.45122	-21.8752	2.3225e-09	1.2248e-08	1.43995e-07	248.333	-4.88844	-29.6188	5.3757e-11	4.76133e-10	3.33293e-09	314.833	-4.16789	-17.9746	2.20818e-08	1.05313e-07	1.36907e-06	248.333	-4.60511	-24.3375	6.34224e-10	6.55365e-09	3.93219e-08	72	0.283331	1.217	0.704702	0.87383	1
Aeromonas	22107.2	0.447356	1.36354	0.642867	0.866473	1	22107.2	-3.79058	-13.8381	8.53106e-05	0.000146924	0.00528925	17803.3	-4.23793	-18.8688	1.11973e-05	3.15561e-05	0.000694234	22107.2	-3.83873	-14.3078	6.92443e-05	0.000138489	0.00429315	17803.3	-4.28609	-19.5093	8.88973e-06	2.90086e-05	0.000551163	9925	-0.0481528	-1.03394	0.960194	0.975935	1
Rheinheimera	45.8333	-0.668181	-1.58907	0.433289	0.688819	1	930.333	2.64669	6.26229	0.00163592	0.0026007	0.101427	930.333	3.31487	9.9512	9.05809e-05	0.000200572	0.00561602	4880.83	5.27619	38.7519	3.39242e-10	2.1033e-09	2.1033e-08	4880.83	5.94438	61.5794	2.2008e-12	2.72899e-11	1.36449e-10	4880.83	2.6295	6.18813	0.00162063	0.0111644	0.100479
Shewanella	12285.5	0.344583	1.26978	0.828256	0.954834	1	12285.5	-10.8226	-1811.04	1.00744e-11	7.80765e-11	6.24612e-10	10392.3	-11.1672	-2299.63	2.18536e-12	2.70985e-11	1.35493e-10	12285.5	-11.6948	-3314.92	2.06835e-13	2.56475e-12	1.28237e-11	10392.3	-12.0393	-4209.23	4.00791e-14	6.21225e-13	2.4849e-12	49.5	-0.872152	-1.83039	0.58434	0.787588	1
{Unknown Genus} Burkholderiaceae	7.16667	0.737025	1.66674	0.155856	0.292821	1	119.833	3.72669	13.2387	1.11022e-16	2.29446e-15	6.88338e-15	119.833	2.98967	7.94291	6.19171e-13	9.59716e-12	3.83886e-11	39.1667	2.21903	4.65579	1.2411e-06	3.34557e-06	7.69481e-05	39.1667	1.482	2.79336	0.000459148	0.000918295	0.0284672	119.833	-1.50767	-2.8435	6.83134e-06	0.000141181	0.000423543
Ambiguous_taxa-3	1572.83	0.2764	1.21117	0.461022	0.714584	1	2882.67	0.262886	1.19988	0.482174	0.515427	1	2882.67	-0.0135134	-1.00941	0.97119	0.97119	1	1250.5	-0.707262	-1.6327	0.058788	0.0714678	1	1572.83	-0.983661	-1.97748	0.00860194	0.0144141	0.533321	2882.67	-0.970148	-1.95904	0.00938677	0.058198	0.58198
Acidovorax	20.6667	1.01505	2.02098	0.0454121	0.100555	1	95.5	2.26956	4.82176	1.67586e-06	4.119e-06	0.000103903	95.5	1.25451	2.38586	0.00526973	0.00907565	0.326724	42.5	1.28592	2.43838	0.00722451	0.00973738	0.44792	42.5	0.270872	1.20654	0.551344	0.633025	1	95.5	-0.983635	-1.97744	0.0183517	0.103437	1
Aquabacterium	7.5	0.586381	1.50148	0.325659	0.545698	1	162	3.98385	15.8219	6.81677e-14	6.03771e-13	4.2264e-12	162	3.39747	10.5376	2.77084e-11	2.8632e-10	1.71792e-09	110	3.55411	11.7461	2.55094e-11	2.2594e-10	1.58158e-09	110	2.96772	7.82301	6.4766e-09	4.46166e-08	4.01549e-07	162	-0.429745	-1.347	0.32207	0.569244	1
Azohydromonas	0	-0.114076	-1.08228	0.96524	0.974238	1	115.333	8.72719	423.784	6.64047e-06	1.41969e-05	0.000411709	115.333	8.84126	458.654	1.41761e-05	3.82138e-05	0.000878917	10.8333	5.36478	41.2058	0.00581041	0.00800545	0.360245	10.8333	5.47885	44.5963	0.00735092	0.0126599	0.455757	115.333	-3.36241	-10.2846	0.00120442	0.0106677	0.0746738
Burkholderia-Caballeronia-Paraburkholderia	826	0.168454	1.12385	0.755564	0.954834	1	688.667	-2.58851	-6.01478	1.72732e-06	4.119e-06	0.000107094	826	-2.75697	-6.75973	3.55077e-07	1.29499e-06	2.20148e-05	688.667	-1.87378	-3.66491	0.000529013	0.000863126	0.0327988	826	-2.04223	-4.11882	0.000159865	0.000353987	0.00991162	290.833	0.714736	1.64118	0.186487	0.398696	1
Comamonas	134.667	-9.06547	-535.77	2.12556e-05	0.000150955	0.00131785	134.667	-10.0852	-1086.3	2.28109e-07	6.73465e-07	1.41428e-05	0	-1.01973	-2.02754	0.697745	0.772504	1	134.667	-10.2994	-1260.17	1.54957e-06	4.00306e-06	9.60735e-05	0	-1.23394	-2.35208	0.656366	0.701632	1	0	-0.214205	-1.16006	0.935205	0.975935	1
Herminiimonas	1.16667	-4.86608	-29.1633	0.0174554	0.0450932	1	622.833	6.48615	89.6446	4.36062e-10	2.70358e-09	2.70358e-08	622.833	11.3522	2614.33	1.50008e-08	7.15422e-08	9.30048e-07	987.5	7.30513	158.148	2.07889e-12	2.14819e-11	1.28891e-10	987.5	12.1712	4612.11	1.27808e-09	1.13201e-08	7.92407e-08	987.5	0.818984	1.76416	0.390536	0.618126	1
Hydrogenophaga	32.6667	3.82712	14.1931	5.43702e-05	0.00030645	0.00337095	51.1667	4.00974	16.1084	1.63776e-05	3.17317e-05	0.00101541	51.1667	0.182623	1.13495	0.812539	0.853855	1	50.5	4.15665	17.8351	7.94495e-06	1.8244e-05	0.000492587	50.5	0.329527	1.2566	0.668762	0.702767	1	51.1667	0.146904	1.10719	0.844346	0.975935	1
Limnobacter	101.333	1.36475	2.57531	0.228351	0.404508	1	101.333	-4.45247	-21.8941	0.000115514	0.000193565	0.0071619	74.6667	-5.81722	-56.3842	4.46316e-07	1.53731e-06	2.76716e-05	101.333	-3.88238	-14.7473	0.000729263	0.00114945	0.0452143	74.6667	-5.24712	-37.9788	4.74327e-06	1.83802e-05	0.000294083	8.33333	0.570095	1.48462	0.62559	0.808054	1
Pelomonas	252.667	0.747395	1.67876	0.146881	0.28943	1	3996.17	4.07179	16.8163	1.55431e-15	1.92735e-14	9.63674e-14	3996.17	3.32439	10.0171	6.67068e-11	5.16977e-10	4.13582e-09	2016.33	3.13581	8.7897	8.15906e-10	4.59874e-09	5.05861e-08	2016.33	2.38842	5.23583	2.7438e-06	1.21511e-05	0.000170116	3996.17	-0.935973	-1.91318	0.0635902	0.207505	1
Polynucleobacter	0	-0.14471	-1.10551	0.959341	0.974238	1	1.83333	2.10372	4.29815	0.355047	0.386191	1	1.83333	2.24843	4.75164	0.34161	0.423597	1	162	8.95214	495.294	5.55128e-05	0.000118683	0.00344179	162	9.09685	547.552	8.3614e-05	0.000199387	0.00518407	162	6.84843	115.234	1.2852e-05	0.000199207	0.000796826
Ralstonia	522.167	-1.71538	-3.28382	0.0121232	0.0341654	0.75164	522.167	-3.35486	-10.2309	8.23919e-07	2.12846e-06	5.1083e-05	142.333	-1.63949	-3.11555	0.0167855	0.0247785	1	522.167	-3.23037	-9.38512	2.07871e-06	5.15519e-06	0.00012888	142.333	-1.515	-2.85799	0.0271537	0.040084	1	88.3333	0.124487	1.09012	0.855266	0.975935	1
uncultured-2	2553.17	2.05931	4.16788	8.27523e-05	0.000366475	0.00513064	2500.17	1.37489	2.59349	0.00853641	0.0120286	0.529258	2553.17	-0.684418	-1.60705	0.189527	0.255449	1	2181.17	1.34794	2.54548	0.00992558	0.0130933	0.615386	2553.17	-0.711374	-1.63736	0.172695	0.218512	1	2500.17	-0.026956	-1.01886	0.958759	0.975935	1
Variovorax	1562.33	-0.0248257	-1.01736	0.962419	0.974238	1	1435.83	-2.37517	-5.18798	6.49581e-06	1.41969e-05	0.00040274	1562.33	-2.35035	-5.09947	8.18394e-06	2.41621e-05	0.000507404	1435.83	-1.71913	-3.29238	0.00109387	0.00165414	0.0678197	1562.33	-1.69431	-3.23621	0.00129758	0.00236617	0.0804497	694.833	0.656042	1.57575	0.212802	0.43979	1
C39	280.167	-10.2988	-1259.63	5.65691e-07	1.13e-05	3.50729e-05	280.167	-2.19716	-4.58576	0.0393155	0.0507825	1	84.3333	8.10163	274.684	8.30621e-05	0.000190735	0.00514985	280.167	-0.980369	-1.97297	0.357304	0.388647	1	155.167	9.31842	638.446	5.96258e-06	2.17459e-05	0.00036968	155.167	1.21679	2.32429	0.253214	0.506427	1
Dechloromonas	0	-0.0783459	-1.05581	0.974238	0.974238	1	106.333	8.50321	362.846	4.1925e-07	1.13015e-06	2.59935e-05	106.333	8.58156	383.095	1.58972e-06	5.18752e-06	9.85629e-05	72.1667	8.26762	308.178	8.71005e-07	2.45465e-06	5.40023e-05	72.1667	8.34597	325.377	3.05694e-06	1.26354e-05	0.00018953	106.333	-0.235592	-1.17739	0.523093	0.737086	1
Methyloversatilis	3	-0.0437761	-1.03081	0.969052	0.974238	1	148	4.21763	18.6052	4.92854e-05	8.98734e-05	0.0030557	148	4.26141	19.1783	4.96592e-05	0.000123155	0.00307887	119.667	4.14404	17.6799	6.68377e-05	0.000138131	0.00414394	119.667	4.18782	18.2246	6.71164e-05	0.000166449	0.00416122	148	-0.0735896	-1.05233	0.938518	0.975935	1
Zoogloea	0	-0.0862293	-1.06159	0.972083	0.974238	1	324	10.1495	1135.84	4.60875e-09	2.04102e-08	2.85742e-07	324	10.2358	1205.8	2.54306e-08	1.05113e-07	1.5767e-06	418.5	10.8997	1910.5	3.08832e-10	2.1033e-09	1.91476e-08	418.5	10.986	2028.17	2.24697e-09	1.7414e-08	1.39312e-07	418.5	0.750184	1.68201	0.173911	0.398696	1
Cellvibrio	273	-2.8813	-7.36815	0.0287751	0.0686177	1	273	-2.94514	-7.70151	0.0238709	0.0314893	1	33.6667	-0.0638382	-1.04524	0.961394	0.97119	1	273	-1.7687	-3.40747	0.174373	0.200206	1	86.8333	1.1126	2.16235	0.39837	0.484293	1	86.8333	1.17644	2.26018	0.366702	0.598304	1
Enterobacter	3	-1.33976	-2.5311	0.235673	0.405881	1	43.1667	1.3029	2.46724	0.20943	0.231869	1	43.1667	2.64266	6.24483	0.0159308	0.0240904	0.987707	154	3.32686	10.0342	0.00131243	0.0019374	0.0813709	154	4.66662	25.3976	1.98487e-05	6.15309e-05	0.00123062	154	2.02396	4.06698	0.0427127	0.155776	1
Plesiomonas	180.5	0.172152	1.12674	0.84703	0.954834	1	180.5	-3.37389	-10.3667	0.000158744	0.000259003	0.00984213	126.5	-3.54604	-11.6806	7.22247e-05	0.000172228	0.00447793	180.5	-3.27276	-9.66491	0.000249036	0.000454124	0.0154402	126.5	-3.44491	-10.8898	0.000115679	0.000265633	0.0071721	95.1667	0.10113	1.07261	0.909982	0.975935	1
HdN1	0	-0.118882	-1.08589	0.964082	0.974238	1	516.5	10.7827	1761.62	4.21962e-08	1.53892e-07	2.61616e-06	516.5	10.9016	1912.93	1.31298e-07	5.0878e-07	8.14048e-06	196	9.74546	858.373	7.28677e-07	2.2589e-06	4.5178e-05	196	9.86434	932.102	1.80201e-06	8.5942e-06	0.000111725	516.5	-1.03722	-2.05227	0.337363	0.569244	1
Acinetobacter	16.8333	3.66789	12.71	0.00025773	0.00106529	0.0159793	178.167	5.49943	45.2371	2.27226e-08	9.39201e-08	1.4088e-06	178.167	1.83154	3.55918	0.0294988	0.0425332	1	16.8333	2.378	5.19815	0.0166655	0.0215263	1	16.8333	-1.28989	-2.4451	0.130258	0.16825	1	178.167	-3.12144	-8.70253	0.00016641	0.00203844	0.0103174
Pseudomonas	6984	-1.22938	-2.34466	0.0151729	0.0409009	0.940721	31716.8	0.866908	1.82375	0.0866668	0.103334	1	31716.8	2.09629	4.27608	3.45532e-05	8.92624e-05	0.0021423	14943.5	-0.0917354	-1.06565	0.85614	0.884678	1	14943.5	1.13765	2.20022	0.0246185	0.0372279	1	31716.8	-0.958644	-1.94348	0.0581189	0.200187	1
uncultured-3	80.1667	-0.189666	-1.1405	0.740262	0.954834	1	80.1667	-3.45551	-10.9701	2.37057e-09	1.2248e-08	1.46976e-07	57.3333	-3.26584	-9.61868	2.01701e-08	8.93248e-08	1.25055e-06	80.1667	-2.14644	-4.42734	0.000163871	0.000307879	0.01016	57.3333	-1.95677	-3.88193	0.000635628	0.00119421	0.039409	36.6667	1.30907	2.47781	0.0238845	0.113911	1
Vibrio	14695.8	0.424537	1.34214	0.797763	0.954834	1	10755	-14.5911	-24680.3	1.11022e-15	1.72085e-14	6.88338e-14	14695.8	-15.0156	-33124.5	1.11022e-16	2.29446e-15	6.88338e-15	10755	-12.5486	-5990.97	1.80744e-13	2.56475e-12	1.12061e-11	14695.8	-12.9731	-8040.73	2.70894e-14	5.59848e-13	1.67955e-12	2.16667	2.0425	4.11959	0.273104	0.529138	1
Stenotrophomonas	586.5	-6.42034	-85.6472	1.17589e-08	7.2905e-07	7.2905e-07	680.833	-2.80134	-6.97086	0.0115813	0.0159564	0.71804	680.833	3.619	12.2865	0.00130645	0.00245455	0.0810001	586.5	-5.23314	-37.6124	2.46041e-06	5.86712e-06	0.000152545	122.833	1.1872	2.2771	0.292129	0.36224	1	680.833	-2.4318	-5.39567	0.0285818	0.118138	1
Ambiguous_taxa-4	489	-11.0079	-2059.22	7.29031e-07	1.13e-05	4.51999e-05	489	-12.064	-4281.66	3.70379e-09	1.76642e-08	2.29635e-07	0	-1.05606	-2.07924	0.695753	0.772504	1	489	-12.282	-4980.41	3.78317e-08	1.56371e-07	2.34556e-06	0	-1.27415	-2.41857	0.654234	0.701632	1	0	-0.218092	-1.16319	0.935839	0.975935	1

## Sheet: Differential OTU abundance
Name	15MP vs. 15C - Max group mean	15MP vs. 15C - Log₂ fold change	15MP vs. 15C - Fold change	15MP vs. 15C - P-value	15MP vs. 15C - FDR p-value	15MP vs. 15C - Bonferroni	9C vs. 15C - Max group mean	9C vs. 15C - Log₂ fold change	9C vs. 15C - Fold change	9C vs. 15C - P-value	9C vs. 15C - FDR p-value	9C vs. 15C - Bonferroni	9C vs. 15MP - Max group mean	9C vs. 15MP - Log₂ fold change	9C vs. 15MP - Fold change	9C vs. 15MP - P-value	9C vs. 15MP - FDR p-value	9C vs. 15MP - Bonferroni	9MP vs. 15C - Max group mean	9MP vs. 15C - Log₂ fold change	9MP vs. 15C - Fold change	9MP vs. 15C - P-value	9MP vs. 15C - FDR p-value	9MP vs. 15C - Bonferroni	9MP vs. 15MP - Max group mean	9MP vs. 15MP - Log₂ fold change	9MP vs. 15MP - Fold change	9MP vs. 15MP - P-value	9MP vs. 15MP - FDR p-value	9MP vs. 15MP - Bonferroni	9MP vs. 9C - Max group mean	9MP vs. 9C - Log₂ fold change	9MP vs. 9C - Fold change	9MP vs. 9C - P-value	9MP vs. 9C - FDR p-value	9MP vs. 9C - Bonferroni
D_6__Azolla filiculoides, GBTV01025760.129.1889	118.5	0.0294572	1.02063	0.969675	0.996224	1	171.833	-0.0155116	-1.01081	0.983964	0.993425	1	171.833	-0.0449688	-1.03166	0.95363	0.95363	1	255.333	0.939777	1.91823	0.223102	0.249209	1	255.333	0.91032	1.87946	0.238913	0.309702	1	255.333	0.955289	1.93897	0.214649	0.508037	1
D_6__Stenotrophomonas rhizophila, LNNI01000005.225118.226745	12.1667	-1.01082	-2.01505	0.284329	0.574125	1	237.833	3.56165	11.8076	6.00026e-05	0.000134048	0.00630028	237.833	4.57246	23.7929	7.93245e-07	3.20349e-06	8.32907e-05	39.5	1.27468	2.41945	0.15301	0.178512	1	39.5	2.28549	4.8753	0.0140335	0.024975	1	237.833	-2.28697	-4.8803	0.00880069	0.0545271	0.924073
D_6__Aeromonas salmonicida, KR088380.1.1569	14681	0.240796	1.18164	0.699083	0.884807	1	14681	-2.05473	-4.15465	0.000972147	0.00182278	0.102075	10912	-2.29552	-4.90931	0.000228719	0.000510969	0.0240155	14681	-1.76373	-3.39574	0.00463586	0.00825027	0.486766	10912	-2.00452	-4.01256	0.00129168	0.00301392	0.135627	8656.83	0.290999	1.22349	0.640409	0.860176	1
Ambiguous_taxa, AFOQ01000002.114641.116187	14695.8	0.785298	1.72345	0.617822	0.842484	1	10755	-14.6705	-26077	0	0	0	14695.8	-15.4558	-44942.4	0	0	0	10755	-12.3891	-5364.14	2.35367e-14	3.53051e-13	2.47136e-12	14695.8	-13.1744	-9244.81	4.44089e-16	1.55431e-14	4.66294e-14	2.16667	2.28136	4.86136	0.202108	0.508037	1
Ambiguous_taxa, X93146.1.1546	0.166667	-1.07078	-2.10057	0.629607	0.847391	1	835	10.4869	1435.03	9.4369e-15	1.41553e-13	9.90874e-13	835	11.5576	3014.37	3.0131e-09	1.86103e-08	3.16375e-07	54.6667	6.75384	107.922	6.38222e-07	2.31081e-06	6.70133e-05	54.6667	7.82462	226.697	6.03244e-05	0.000171191	0.00633406	835	-3.73302	-13.2969	9.1176e-06	0.000255009	0.000957348
Ambiguous_taxa, JN868813.1.1537	160.5	-2.28892	-4.88689	0.0240098	0.0720294	1	532.833	0.512942	1.42696	0.610362	0.647354	1	532.833	2.80186	6.97338	0.00569888	0.00879974	0.598383	160.5	-1.44158	-2.71618	0.152706	0.178512	1	105.667	0.847338	1.79918	0.403768	0.492973	1	532.833	-1.95452	-3.87587	0.0523555	0.229181	1
D_6__uncultured beta proteobacterium, KM978287.1.1535	113.833	-0.261727	-1.19891	0.730749	0.90269	1	113.833	-1.71497	-3.28291	0.02394	0.0306549	1	84	-1.45325	-2.73824	0.0564902	0.0770322	1	113.833	-1.58868	-3.00774	0.036727	0.0494401	1	84	-1.32695	-2.50873	0.0820358	0.116402	1	59.1667	0.126293	1.09149	0.868361	0.959768	1
Ambiguous_taxa, D84006.1.1530	254.167	-2.77804	-6.85921	3.70957e-06	3.24587e-05	0.000389504	782.833	0.554318	1.46847	0.345885	0.382294	1	782.833	3.33236	10.0726	2.73224e-08	1.36716e-07	2.86886e-06	719	0.823115	1.76922	0.161647	0.186516	1	719	3.60116	12.1355	1.90683e-09	1.11232e-08	2.00217e-07	782.833	0.268797	1.2048	0.64718	0.860176	1
D_6__Hydrogenophaga taeniospiralis, AB795548.1.1519	32.6667	4.19186	18.2757	2.14211e-06	2.24921e-05	0.000224921	51.1667	4.02399	16.2683	4.41788e-06	1.10447e-05	0.000463877	51.1667	-0.167862	-1.12339	0.822782	0.846982	1	50.5	4.38437	20.8846	5.72809e-07	2.14803e-06	6.0145e-05	50.5	0.192515	1.14275	0.797376	0.837244	1	51.1667	0.360378	1.28376	0.626498	0.860176	1
Ambiguous_taxa, AY661995.1.1531	327.5	-7.62973	-198.052	1.53952e-08	8.08246e-07	1.61649e-06	327.5	-2.74171	-6.68865	0.02815	0.0356114	1	116.833	4.88802	29.6101	0.000291934	0.000625573	0.0306531	327.5	-5.88743	-59.196	3.05532e-06	8.67051e-06	0.000320809	11.3333	1.7423	3.34569	0.200487	0.26647	1	116.833	-3.14571	-8.85022	0.0126963	0.070164	1
Ambiguous_taxa, AY212647.1.1524	0	0.201376	1.14979	0.934483	0.98385	1	324	10.3154	1274.2	1.74916e-09	1.02034e-08	1.83662e-07	324	10.114	1108.19	2.73433e-08	1.36716e-07	2.87105e-06	418.5	11.2674	2464.98	4.85131e-11	4.63079e-10	5.09387e-09	418.5	11.066	2143.84	1.1939e-09	7.83495e-09	1.25359e-07	418.5	0.951989	1.93454	0.0555465	0.229181	1
D_6__uncultured bacterium, AY957922.1.1530	0	0.199171	1.14804	0.936145	0.98385	1	106.333	8.72791	423.998	6.89311e-07	2.01049e-06	7.23777e-05	106.333	8.52874	369.324	4.84624e-06	1.59017e-05	0.000508855	72.1667	8.65862	404.115	8.49016e-07	2.8757e-06	8.91467e-05	72.1667	8.45945	352.005	5.80901e-06	2.17838e-05	0.000609946	106.333	-0.0692898	-1.0492	0.911997	0.97714	1
Ambiguous_taxa, BBUL01000055.3960.5476	273	-2.71571	-6.56916	0.0419688	0.115966	1	273	-3.65415	-12.5895	0.00608129	0.00886855	0.638536	33.6667	-0.938438	-1.91645	0.483284	0.563832	1	273	-1.7899	-3.4579	0.178188	0.203366	1	86.8333	0.925811	1.89975	0.488364	0.589405	1	86.8333	1.86425	3.64078	0.161902	0.43589	1
Ambiguous_taxa, BDMA01000120.213.1729	1818.83	-2.90291	-7.47935	0.0007128	0.00305262	0.074844	3867.17	0.0918509	1.06574	0.914576	0.950797	1	3867.17	2.99476	7.97102	0.000479447	0.000987097	0.050342	5160.83	0.898146	1.86367	0.294216	0.321798	1	5160.83	3.80106	13.939	9.32741e-06	2.96781e-05	0.000979378	5160.83	0.806295	1.74871	0.346333	0.624859	1
Ambiguous_taxa, DQ234095.1.1540	395.5	2.51655	5.72214	0.00059381	0.00271087	0.06235	2496	3.96249	15.5893	6.17255e-08	2.70049e-07	6.48118e-06	2496	1.44593	2.72439	0.0474978	0.0656219	1	761.5	2.84314	7.1758	0.000103002	0.000240338	0.0108152	761.5	0.326585	1.25404	0.654508	0.731099	1	2496	-1.11935	-2.17249	0.124657	0.353756	1
Ambiguous_taxa, FPLL01000761.10.1526	1487	0.322376	1.25039	0.707846	0.884807	1	1368.67	-2.22135	-4.66329	0.00983142	0.0134065	1	1487	-2.54372	-5.83092	0.00311474	0.00511012	0.327048	1368.67	-1.3709	-2.58632	0.111051	0.135586	1	1487	-1.69328	-3.23391	0.0490596	0.0746559	1	644.833	0.850447	1.80306	0.323026	0.624859	1
D_6__uncultured Acinetobacter sp., JN082574.1.1532	16.8333	3.90183	14.9475	1.57944e-05	9.75538e-05	0.00165841	178.167	6.32151	79.9765	9.861e-13	1.03541e-11	1.03541e-10	178.167	2.41967	5.3505	0.000800102	0.00154381	0.0840107	16.8333	3.22124	9.32587	0.000332271	0.000726844	0.0348885	16.8333	-0.680594	-1.6028	0.354795	0.438276	1	178.167	-3.10027	-8.57578	1.40936e-05	0.000295965	0.00147983
Ambiguous_taxa, FPLM01003094.15.1529	128.5	0.520031	1.43399	0.444699	0.805945	1	97	-2.13996	-4.40749	0.00174549	0.00295607	0.183276	128.5	-2.65999	-6.32028	0.000100647	0.000251619	0.010568	97	-1.32426	-2.50404	0.052198	0.066839	1	128.5	-1.84429	-3.59076	0.00688356	0.0138995	0.722774	49	0.815699	1.76015	0.23416	0.523124	1
Ambiguous_taxa, AB761294.1.1530	1048.83	0.464702	1.38003	0.576233	0.834829	1	834.5	-2.04225	-4.11886	0.0140701	0.018239	1	1048.83	-2.50695	-5.68416	0.00257825	0.00431534	0.270716	834.5	-1.25643	-2.38904	0.130818	0.156089	1	1048.83	-1.72113	-3.29695	0.038493	0.0621809	1	440	0.785817	1.72407	0.344853	0.624859	1
Ambiguous_taxa, AFHG01000027.189.1709	3	-0.00441683	-1.00307	0.996224	0.996224	1	148	4.75157	26.9379	8.32035e-09	4.16017e-08	8.73637e-07	148	4.75598	27.0205	3.1603e-08	1.44274e-07	3.31831e-06	119.667	4.95572	31.0328	1.8864e-09	1.1004e-08	1.98072e-07	119.667	4.96014	31.1279	8.0246e-09	4.43465e-08	8.42583e-07	148	0.204155	1.15201	0.782859	0.903299	1
D_6__uncultured bacterium, JN869042.1.1525	101.333	0.814325	1.75848	0.504983	0.834829	1	101.333	-4.52353	-22.9994	0.000270373	0.000567784	0.0283892	74.6667	-5.33785	-40.4439	1.71978e-05	4.88045e-05	0.00180577	101.333	-3.97238	-15.6966	0.00136547	0.00275721	0.143375	74.6667	-4.78671	-27.6022	0.000113935	0.000314821	0.0119632	8.33333	0.551142	1.46525	0.661977	0.868845	1
D_6__uncultured bacterium, KC286852.1.1516	75.3333	0.376773	1.29843	0.591677	0.83906	1	67.1667	-1.99015	-3.97277	0.00478763	0.00728552	0.502701	75.3333	-2.36692	-5.15839	0.000808661	0.00154381	0.0849094	67.1667	-0.697241	-1.6214	0.320228	0.346638	1	75.3333	-1.07401	-2.10528	0.126338	0.17228	1	50	1.29291	2.45021	0.0669163	0.242283	1
D_6__uncultured bacterium, FR853538.1.1512	5095.33	0.785765	1.72401	0.56957	0.834829	1	5095.33	-9.6026	-777.446	4.65206e-12	4.4406e-11	4.88466e-10	4255.17	-10.3884	-1340.32	7.33857e-14	1.28425e-12	7.7055e-12	5095.33	-10.0008	-1024.55	7.27862e-13	9.55319e-12	7.64255e-11	4255.17	-10.7865	-1766.34	1.0103e-14	2.65205e-13	1.06082e-12	18.6667	-0.398182	-1.31785	0.776205	0.903299	1
D_6__uncultured Shewanella sp., GU179540.1.1512	6903.17	0.801805	1.74328	0.60732	0.83906	1	6903.17	-9.46282	-705.655	1.45336e-09	8.97665e-09	1.52603e-07	5866.33	-10.2646	-1230.16	5.30754e-11	6.19213e-10	5.57292e-09	6903.17	-9.87799	-940.963	2.95133e-10	2.06593e-09	3.0989e-08	5866.33	-10.6798	-1640.36	9.57168e-12	1.33654e-10	1.00503e-09	27.6667	-0.415175	-1.33346	0.791647	0.90351	1
Ambiguous_taxa, AF078772.1.1519	134.667	-9.32379	-640.825	2.01565e-05	0.00011758	0.00211643	134.667	-10.3401	-1296.19	2.86676e-07	1.00337e-06	3.0101e-05	0	-1.01628	-2.02269	0.703596	0.757372	1	134.667	-10.3296	-1286.81	2.8482e-06	8.30725e-06	0.000299061	0	-1.0058	-2.00805	0.721199	0.765303	1	0	0.0104809	1.00729	0.996888	0.997122	1
D_6__uncultured bacterium, FR853603.1.1511	175.333	0.778092	1.71486	0.557401	0.834829	1	175.333	-7.69605	-207.368	2.46683e-08	1.17735e-07	2.59018e-06	162.5	-8.47414	-355.608	8.27951e-10	7.24457e-09	8.69349e-08	175.333	-7.95069	-247.397	1.87464e-08	8.20153e-08	1.96837e-06	162.5	-8.72878	-424.252	6.67252e-10	5.00439e-09	7.00615e-08	2.33333	-0.254636	-1.19303	0.861989	0.959768	1
D_6__Burkholderia sp. K24, JMIK01000028.3582.5092	51.3333	0.232318	1.17472	0.748694	0.914103	1	47.6667	-2.76895	-6.81611	0.000169763	0.000371357	0.0178252	51.3333	-3.00127	-8.00703	4.8241e-05	0.000126633	0.0050653	47.6667	-1.92512	-3.79767	0.00852618	0.0142103	0.895249	51.3333	-2.15743	-4.4612	0.00328901	0.00704787	0.345346	16.5	0.843834	1.79481	0.257392	0.551555	1
D_6__uncultured bacterium, JN868901.1.1523	0	0.23842	1.1797	0.930437	0.98385	1	1.83333	2.76245	6.78546	0.197985	0.228444	1	1.83333	2.52403	5.75185	0.258118	0.315145	1	162	9.49168	719.913	6.10943e-06	1.60372e-05	0.00064149	162	9.25326	610.251	2.31963e-05	6.76559e-05	0.00243561	162	6.72923	106.096	1.24898e-06	0.000131143	0.000131143
D_6__uncultured bacterium, JF830174.1.1513	180.5	0.18302	1.13526	0.811084	0.962825	1	180.5	-2.20255	-4.60291	0.00405974	0.00636229	0.426273	126.5	-2.38557	-5.22549	0.00186854	0.00331014	0.196196	180.5	-1.79002	-3.45819	0.019542	0.0297378	1	126.5	-1.97304	-3.92594	0.010105	0.0189469	1	95.1667	0.412527	1.33102	0.591108	0.850224	1
Ambiguous_taxa, AB021394.1.1514	774.667	0.464187	1.37954	0.533495	0.834829	1	641	-2.44352	-5.43969	0.00105739	0.00194388	0.111026	774.667	-2.90771	-7.50426	9.76056e-05	0.000249966	0.0102486	641	-1.49409	-2.81687	0.0451379	0.0599935	1	774.667	-1.95828	-3.88599	0.00865248	0.0165184	0.908511	274.333	0.94943	1.93111	0.20347	0.508037	1
D_6__uncultured bacterium, JF830173.1.1510	44.8333	0.995261	1.99344	0.182716	0.408195	1	452	2.34761	5.08979	0.00157685	0.00271425	0.165569	452	1.35234	2.55327	0.0682632	0.0918928	1	322	2.35934	5.13136	0.00149769	0.00296712	0.157257	322	1.36408	2.57412	0.0659724	0.0962098	1	452	0.0117367	1.00817	0.987308	0.997122	1
Ambiguous_taxa, CP013656.823416.824944	35.5	-0.154731	-1.11321	0.881816	0.98385	1	885	3.6877	12.8858	0.000349784	0.000706294	0.0367273	885	3.84244	14.3446	0.000206885	0.000472238	0.021723	4586.17	6.74022	106.908	6.32444e-11	5.53389e-10	6.64066e-09	4586.17	6.89495	119.011	2.75382e-11	2.89151e-10	2.89151e-09	4586.17	3.05251	8.29657	0.00292843	0.0279532	0.307485
D_6__uncultured bacterium, DQ264617.1.1515	69.1667	1.10576	2.15212	0.238503	0.511078	1	324.167	2.42703	5.37786	0.00935508	0.0130971	0.982283	324.167	1.32128	2.49887	0.156394	0.195492	1	191.333	1.99081	3.97461	0.0331204	0.0451642	1	191.333	0.885056	1.84684	0.342673	0.428342	1	324.167	-0.436219	-1.35305	0.638496	0.860176	1
Ambiguous_taxa, CP002542.2752771.2754283	93.5	-0.0214734	-1.015	0.981472	0.996224	1	396	0.903569	1.87069	0.326974	0.365237	1	396	0.925042	1.89874	0.316282	0.38172	1	452.167	1.75833	3.38306	0.0564228	0.0713783	1	452.167	1.7798	3.43379	0.0538095	0.0807142	1	452.167	0.854758	1.80846	0.352898	0.624859	1
D_6__uncultured bacterium, KT851870.1.1505	80.1667	0.00951218	1.00662	0.987174	0.996224	1	80.1667	-3.08208	-8.46834	3.12297e-07	1.05778e-06	3.27912e-05	57.3333	-3.09159	-8.52436	3.22389e-07	1.35403e-06	3.38508e-05	80.1667	-1.35183	-2.55235	0.0223997	0.0331263	1	57.3333	-1.36134	-2.56923	0.0220517	0.0373456	1	36.6667	1.73025	3.31786	0.00425554	0.0343717	0.446832
D_6__uncultured Tolumonas sp., JF808900.1.1502	252.667	0.678969	1.60099	0.475891	0.805945	1	252.667	-2.46595	-5.5249	0.0096894	0.0133867	1	217.667	-3.14492	-8.84534	0.000970484	0.00178773	0.101901	252.667	-1.8683	-3.65103	0.0499855	0.064796	1	217.667	-2.54727	-5.84528	0.00753072	0.0146431	0.790725	137.167	0.597646	1.51325	0.53106	0.79659	1
D_6__uncultured Pseudomonas sp., KF851140.1.1502	401.833	-1.42864	-2.69193	0.256953	0.52902	1	803.5	-0.362648	-1.28578	0.773344	0.812011	1	803.5	1.06599	2.09361	0.397585	0.469061	1	1311.17	0.86435	1.82052	0.492411	0.506894	1	1311.17	2.29299	4.90071	0.0687967	0.0989542	1	1311.17	1.227	2.34079	0.329764	0.624859	1
Ambiguous_taxa, KC172281.1.1502	408.333	-2.38491	-5.22312	0.0118436	0.037684	1	408.333	-4.4274	-21.5169	3.05821e-06	8.23364e-06	0.000321112	58.3333	-2.04249	-4.11955	0.0321884	0.0456727	1	408.333	-3.89851	-14.9132	3.94531e-05	9.63389e-05	0.00414257	58.3333	-1.5136	-2.85522	0.112313	0.155169	1	32.3333	0.528885	1.44281	0.57943	0.845002	1
Ambiguous_taxa, HM773515.1.1498	415.333	0.778032	1.71479	0.248147	0.521109	1	1641.17	1.90607	3.74786	0.00460508	0.00711079	0.483534	1641.17	1.12803	2.18561	0.0935282	0.12124	1	1121.83	1.67874	3.20149	0.0125898	0.0200292	1	1121.83	0.900712	1.86699	0.180596	0.24311	1	1641.17	-0.227322	-1.17066	0.735047	0.900018	1
Ambiguous_taxa, AM110970.1.1497	0	0.216993	1.16231	0.934948	0.98385	1	115.333	8.99507	510.254	6.3138e-06	1.54174e-05	0.000662949	115.333	8.77808	439.001	2.67168e-05	7.193e-05	0.00280527	10.8333	6.0139	64.6198	0.00262307	0.00489832	0.275422	10.8333	5.79691	55.5961	0.00569382	0.011957	0.597851	115.333	-2.98117	-7.89625	0.0088282	0.0545271	0.926961
Ambiguous_taxa, HE575561.1.1501	1457.5	0.412412	1.33091	0.420341	0.78814	1	25100.2	3.43355	10.8044	1.89747e-11	1.66029e-10	1.99234e-09	25100.2	3.02114	8.11807	3.49286e-09	2.0375e-08	3.66751e-07	6982.83	1.9537	3.87367	0.000133539	0.000298332	0.0140216	6982.83	1.54129	2.91055	0.00258569	0.00565619	0.271497	25100.2	-1.47985	-2.78919	0.00379084	0.0331699	0.398038
Ambiguous_taxa, KC835922.1.1493	1767	4.91358	30.1395	2.49831e-11	2.62323e-09	2.62323e-09	63.8333	-0.927482	-1.90195	0.209865	0.236944	1	1767	-5.84107	-57.3239	1.9984e-15	4.19664e-14	2.09832e-13	77	-0.247193	-1.1869	0.738058	0.745155	1	1767	-5.16078	-35.7724	2.23888e-12	3.91803e-11	2.35082e-10	77	0.680289	1.60246	0.357063	0.624859	1
Ambiguous_taxa, AMQH01000037.83.1573	0.833333	-0.0612297	-1.04335	0.964143	0.996224	1	5345.67	11.5365	2970.45	0	0	0	5345.67	11.5977	3099.23	0	0	0	4025.17	11.388	2680.01	0	0	0	4025.17	11.4493	2796.2	0	0	0	5345.67	-0.148442	-1.10837	0.880246	0.962769	1
Ambiguous_taxa, HQ674824.1.1494	252.667	1.38855	2.61815	0.0375193	0.106474	1	3996.17	4.32901	20.0984	7.9788e-11	5.9841e-10	8.37774e-09	3996.17	2.94046	7.67657	9.73069e-06	3.00507e-05	0.00102172	2016.33	3.78994	13.832	1.2637e-08	6.03132e-08	1.32689e-06	2016.33	2.40139	5.28311	0.000304034	0.00079809	0.0319236	3996.17	-0.539075	-1.45304	0.416316	0.686927	1
D_6__uncultured bacterium, JN868968.1.1503	92.6667	-0.0855487	-1.06109	0.923237	0.98385	1	465.5	1.77155	3.41421	0.0448396	0.054746	1	465.5	1.8571	3.62278	0.0359042	0.0502659	1	473.833	2.10078	4.28942	0.0173653	0.0268141	1	473.833	2.18633	4.55147	0.0135173	0.024471	1	473.833	0.329233	1.25635	0.708443	0.900018	1
D_6__uncultured bacterium, HM779393.1.1490	683	0.862724	1.81847	0.466165	0.805945	1	683	-4.78114	-27.4958	5.53726e-05	0.000126394	0.00581412	650.667	-5.64386	-50.0002	1.94278e-06	7.28542e-06	0.000203992	683	-5.81056	-56.1245	1.04142e-06	3.31362e-06	0.000109349	650.667	-6.67328	-102.061	2.03684e-08	1.06934e-07	2.13868e-06	69.6667	-1.02942	-2.0412	0.387718	0.656618	1
Ambiguous_taxa, FN547417.1.1487	25.3333	4.42827	21.5299	2.77888e-05	0.000145891	0.00291783	296.167	6.74396	107.185	1.18788e-10	8.31513e-10	1.24727e-08	296.167	2.31569	4.97843	0.0116094	0.0176665	1	944.5	9.18511	582.095	0	0	0	944.5	4.75684	27.0366	2.13435e-07	8.61948e-07	2.24106e-05	944.5	2.44115	5.43074	0.00704849	0.0493394	0.740091
Ambiguous_taxa, CP011270.1884247.1885732	4.33333	-0.34983	-1.27441	0.706995	0.884807	1	2328.83	8.44753	349.109	0	0	0	2328.83	8.79736	444.908	0	0	0	731	7.10238	137.414	0	0	0	731	7.45221	175.122	0	0	0	2328.83	-1.34515	-2.54056	0.0734043	0.256915	1
D_6__Spumella-like flagellate JBL14, HAFU01069250.55.1532	268	-1.16607	-2.244	0.351623	0.683712	1	268	-1.76693	-3.40328	0.157707	0.183991	1	141.167	-0.600856	-1.51662	0.631354	0.728485	1	268	-3.84097	-14.3301	0.00221551	0.00424619	0.232629	67.1667	-2.67491	-6.38597	0.0333293	0.0555489	1	141.167	-2.07405	-4.21067	0.0985925	0.304477	1
D_6__uncultured bacterium, GQ264200.1.1471	11.3333	-0.224066	-1.16802	0.784213	0.946464	1	79.1667	2.11606	4.33508	0.00626394	0.00900978	0.657714	79.1667	2.34012	5.06346	0.00323206	0.00522102	0.339366	42.1667	1.67664	3.19682	0.0308707	0.0432189	1	42.1667	1.9007	3.73395	0.0171153	0.0299517	1	79.1667	-0.43942	-1.35606	0.558884	0.826518	1
D_6__uncultured bacterium, HM779259.1.1471	3532	0.889463	1.85249	0.570453	0.834829	1	3532	-9.39553	-673.497	2.46121e-09	1.36014e-08	2.58427e-07	3393.67	-10.285	-1247.64	6.6374e-11	6.96927e-10	6.96927e-09	3532	-9.87756	-940.68	4.32544e-10	2.6716e-09	4.54172e-08	3393.67	-10.767	-1742.6	1.01832e-11	1.33654e-10	1.06923e-09	14.3333	-0.482032	-1.39671	0.761783	0.903299	1
Ambiguous_taxa, AY328708.1.1482	67	-0.894901	-1.85948	0.472426	0.805945	1	67	-3.98206	-15.8023	0.0015571	0.00271425	0.163496	27.5	-3.08716	-8.49824	0.0146297	0.0219446	1	67	-1.01777	-2.02479	0.411908	0.432503	1	42	-0.12287	-1.0889	0.921467	0.939359	1	42	2.96429	7.80443	0.0185943	0.0929717	1
D_6__metagenome, FPLS01052488.16.1484	91.6667	0.93278	1.90895	0.179198	0.408195	1	55.1667	-2.26803	-4.81666	0.00124932	0.00222337	0.131179	91.6667	-3.20081	-9.19477	5.08803e-06	1.61892e-05	0.000534243	55.1667	-1.3953	-2.63044	0.0460644	0.0604595	1	91.6667	-2.32808	-5.02137	0.000858856	0.00204954	0.0901799	27.3333	0.872732	1.83113	0.216883	0.508037	1
Ambiguous_taxa, GQ480089.1.1468	101.167	5.61149	48.8908	0.00102569	0.00398879	0.107697	4	0.130963	1.09502	0.939676	0.967314	1	101.167	-5.48053	-44.6481	0.00108656	0.00196704	0.114089	97.1667	4.78307	27.5326	0.00511756	0.00895573	0.537344	101.167	-0.82842	-1.77574	0.61663	0.696195	1	97.1667	4.65211	25.1434	0.00553448	0.0415086	0.581121
Ambiguous_taxa, AB269656.1.1479	117.333	-0.298102	-1.22953	0.673845	0.884422	1	117.333	-1.986	-3.96136	0.00502716	0.00754074	0.527852	81.8333	-1.68789	-3.22186	0.0175389	0.0255776	1	117.333	-1.65004	-3.13842	0.0198497	0.0297745	1	81.8333	-1.35194	-2.55255	0.0572776	0.0847063	1	50	0.335958	1.26221	0.636447	0.860176	1
Ambiguous_taxa, HM031593.1.1478	153.167	0.496935	1.41121	0.563122	0.834829	1	122	-2.15007	-4.43849	0.0125725	0.0167103	1	153.167	-2.647	-6.26365	0.00213051	0.00366726	0.223703	122	-1.5016	-2.83157	0.081142	0.101428	1	153.167	-1.99854	-3.99595	0.0203146	0.0349677	1	53.5	0.648466	1.5675	0.452586	0.709276	1
Ambiguous_taxa, HQ010809.1.1467	0	0.205627	1.15319	0.935654	0.98385	1	193.833	9.60949	781.171	1.82345e-07	6.83794e-07	1.91462e-05	193.833	9.40387	677.401	1.34966e-06	5.24867e-06	0.000141714	21.5	7.05835	133.283	0.000131089	0.000298332	0.0137643	21.5	6.85272	115.578	0.00043905	0.0010721	0.0461003	193.833	-2.55114	-5.86099	0.00240053	0.0252056	0.252056
Ambiguous_taxa, KC488627.1.1479	123.667	-0.975971	-1.96696	0.207439	0.453773	1	137.333	-0.640728	-1.55912	0.404418	0.437772	1	137.333	0.335244	1.26159	0.664724	0.757372	1	123.667	-2.57428	-5.95573	0.000905814	0.00194103	0.0951105	38.6667	-1.59831	-3.02788	0.0406521	0.0646738	1	137.333	-1.93355	-3.81994	0.0126134	0.070164	1
Ambiguous_taxa, HM780088.1.1464	152.5	-1.00672	-2.00934	0.393832	0.751862	1	152.5	-3.87807	-14.7033	0.00107376	0.00194388	0.112745	56.6667	-2.87135	-7.31747	0.0157333	0.0232675	1	152.5	-1.07979	-2.11373	0.359322	0.384988	1	90	-0.0730692	-1.05195	0.950672	0.959813	1	90	2.79828	6.95609	0.018331	0.0929717	1
D_6__uncultured bacterium, AY250104.1.1457	301.667	3.52041	11.4749	0.00288468	0.0100964	0.302891	312.667	2.35789	5.1262	0.0459098	0.0554083	1	312.667	-1.16252	-2.23848	0.323151	0.385578	1	544.167	3.54843	11.6999	0.00265909	0.00489832	0.279204	544.167	0.0280185	1.01961	0.980999	0.980999	1	544.167	1.19054	2.28238	0.311441	0.617006	1
Ambiguous_taxa, KU525082.1.1457	2009.5	0.878143	1.83801	0.470793	0.805945	1	2009.5	-7.25589	-152.841	2.84946e-09	1.49597e-08	2.99193e-07	1992	-8.13403	-280.923	2.75742e-11	3.75324e-10	2.89529e-09	2009.5	-7.29077	-156.581	2.51156e-09	1.38797e-08	2.63713e-07	1992	-8.16891	-287.798	2.41097e-11	2.8128e-10	2.53152e-09	36.5	-0.0348797	-1.02447	0.977322	0.997122	1
Ambiguous_taxa, KC344852.1.1456	250.5	-1.96537	-3.90513	0.0769877	0.202093	1	250.5	-3.73133	-13.2813	0.000786203	0.00152873	0.0825513	51	-1.76596	-3.401	0.112919	0.144591	1	250.5	-1.79257	-3.46432	0.106094	0.131057	1	165	0.1728	1.12724	0.876508	0.902287	1	165	1.93876	3.83375	0.0812297	0.266535	1
Ambiguous_taxa, FPLK01000718.10.1458	170.5	-9.74585	-858.605	5.46039e-06	4.41032e-05	0.000573341	170.5	-10.765	-1740.1	4.8398e-08	2.20947e-07	5.08179e-06	0	-1.0191	-2.02665	0.69901	0.757372	1	170.5	-10.7547	-1727.75	7.01108e-07	2.45388e-06	7.36163e-05	0	-1.00883	-2.01228	0.71715	0.765303	1	0	0.0102684	1.00714	0.996915	0.997122	1
Ambiguous_taxa, AY468474.1.1448	306.833	2.55631	5.88201	0.084822	0.213057	1	101	-0.00389005	-1.0027	0.997908	0.997908	1	306.833	-2.5602	-5.89789	0.0840496	0.110315	1	201.333	1.59619	3.02344	0.281833	0.3115	1	306.833	-0.960119	-1.94547	0.516859	0.609777	1	201.333	1.60008	3.0316	0.280197	0.576877	1
Ambiguous_taxa, FJ624432.1.1448	54.3333	8.77235	437.26	6.92252e-06	4.98225e-05	0.000726865	125.5	8.97189	502.121	4.1583e-06	1.06493e-05	0.000436622	125.5	0.199545	1.14834	0.8506	0.867117	1	355.667	10.9963	2042.78	1.66753e-08	7.61262e-08	1.7509e-06	355.667	2.22397	4.67178	0.0356453	0.0584805	1	355.667	2.02443	4.0683	0.05492	0.229181	1
Ambiguous_taxa, FPLP01001504.15.1460	573.333	-11.4561	-2809.53	4.62429e-08	1.6185e-06	4.85551e-06	573.333	-3.35818	-10.2545	0.00357083	0.00576827	0.374937	81.8333	8.09793	273.98	0.000112627	0.000275018	0.0118258	573.333	-2.47536	-5.56105	0.0316607	0.0437418	1	114.833	8.98075	505.215	1.8425e-05	5.52749e-05	0.00193462	114.833	0.882826	1.84398	0.444077	0.707379	1
Ambiguous_taxa, FOZM01000007.3945.5410	144.5	-9.45903	-703.804	2.21203e-05	0.000122244	0.00232263	144.5	-10.4767	-1424.98	3.5783e-07	1.17413e-06	3.75722e-05	0	-1.01769	-2.02468	0.706881	0.757372	1	144.5	-7.99151	-254.498	3.46404e-07	1.39894e-06	3.63724e-05	0.5	1.46752	2.76546	0.533205	0.622072	1	0.5	2.48521	5.59917	0.25722	0.551555	1
Ambiguous_taxa, FJ645062.1.1436	21.8333	4.99854	31.9676	1.82433e-06	2.12838e-05	0.000191554	45.3333	5.08059	33.8383	9.84186e-07	2.79296e-06	0.00010334	45.3333	0.0820478	1.05852	0.914707	0.923503	1	294.667	8.39169	335.853	5.55112e-16	9.71445e-15	5.82867e-14	294.667	3.39315	10.506	8.39628e-06	2.76727e-05	0.00088161	294.667	3.3111	9.92523	9.71463e-06	0.000255009	0.00102004
Ambiguous_taxa, KF358271.1.1428	3.5	4.21488	18.5697	0.000872289	0.0035227	0.0915903	166.667	8.13445	281.005	3.40271e-11	2.74834e-10	3.57285e-09	166.667	3.91957	15.1324	2.30279e-09	1.51121e-08	2.41793e-07	136.167	8.32835	321.428	1.16103e-11	1.21908e-10	1.21908e-09	136.167	4.11347	17.3093	3.67647e-10	2.96945e-09	3.86029e-08	166.667	0.1939	1.14385	0.737157	0.900018	1
D_6__uncultured bacterium, EU799019.1.1425	152.333	-9.58008	-765.406	1.12077e-05	7.35504e-05	0.00117681	152.333	-10.6093	-1562.1	1.39731e-07	5.43399e-07	1.46718e-05	0	-1.02919	-2.04087	0.699457	0.757372	1	152.333	-7.22416	-149.517	3.6531e-07	1.42065e-06	3.83575e-05	1.16667	2.35592	5.11921	0.295182	0.373422	1	1.16667	3.38511	10.4476	0.105283	0.315849	1
Ambiguous_taxa, KP204490.1.1421	19.5	2.56961	5.93648	0.00210831	0.00763353	0.221372	598.5	5.97087	62.7208	3.94795e-13	5.18169e-12	4.14535e-11	598.5	3.40126	10.5653	1.49744e-05	4.36753e-05	0.00157231	1208.67	7.3328	161.21	0	0	0	1208.67	4.76319	27.1559	1.32843e-09	8.20499e-09	1.39485e-07	1208.67	1.36193	2.57029	0.0775564	0.262691	1
D_6__uncultured bacterium, HQ860725.1.1420	280.167	-10.4627	-1411.18	6.72218e-07	1.00833e-05	7.05829e-05	280.167	-2.42415	-5.36715	0.0370319	0.0462898	1	84.3333	8.03853	262.929	0.000135242	0.000322737	0.0142004	280.167	-0.991099	-1.9877	0.393488	0.417335	1	155.167	9.47158	709.955	6.85124e-06	2.48062e-05	0.00071938	155.167	1.43306	2.70018	0.21773	0.508037	1
D_6__Microbacteriaceae bacterium MAEY21, LC094617.1.1418	351.833	-6.90001	-119.429	1.19738e-06	1.57156e-05	0.000125725	351.833	-2.20249	-4.60272	0.0971001	0.114556	1	121.167	4.69753	25.9476	0.000950952	0.00178304	0.09985	434	0.0108427	1.00754	0.993479	0.993479	1	434	6.91086	120.33	1.14825e-06	4.46543e-06	0.000120567	434	2.21333	4.63744	0.0954139	0.30359	1
D_6__uncultured bacterium, DQ814980.1.1413	373	0.273819	1.209	0.693467	0.884807	1	373	-2.12082	-4.34941	0.00228065	0.0037417	0.239469	276.5	-2.39464	-5.25846	0.000573261	0.00115755	0.0601924	373	-1.87947	-3.67941	0.00687124	0.0118276	0.721481	276.5	-2.15329	-4.44842	0.00196187	0.00447819	0.205997	209.833	0.241348	1.1821	0.728745	0.900018	1
Ambiguous_taxa, JN867359.1.1409	88.6667	-4.27635	-19.378	2.8679e-06	2.73754e-05	0.000301129	1724.83	3.79662	13.8962	3.93543e-06	1.03305e-05	0.00041322	1724.83	8.07296	269.28	0	0	0	559.833	2.51713	5.72444	0.00222419	0.00424619	0.23354	559.833	6.79348	110.928	8.80407e-14	1.84885e-12	9.24427e-12	1724.83	-1.27949	-2.42753	0.118491	0.345599	1
D_6__Ensifer sp., KY048277.1.1406	207	-3.89129	-14.8387	0.000726814	0.00305262	0.0763155	207	-1.41534	-2.66722	0.209318	0.236944	1	111.333	2.47595	5.56334	0.03158	0.0454232	1	207	-2.50744	-5.68611	0.0264926	0.0375908	1	34.8333	1.38385	2.60963	0.230616	0.302684	1	111.333	-1.0921	-2.13185	0.333935	0.624859	1
Ambiguous_taxa, KM035949.1.1400	102.333	-1.8808	-3.6828	0.012875	0.0397611	1	205.5	0.391004	1.31131	0.596511	0.639119	1	205.5	2.27181	4.82927	0.0025892	0.00431534	0.271866	102.333	-0.369043	-1.2915	0.618039	0.63004	1	86.3333	1.51176	2.85157	0.0454228	0.0701381	1	205.5	-0.760047	-1.69355	0.303035	0.611898	1
D_6__Aquabacterium sp. JJ2211, KC505151.1.1394	7.5	1.07672	2.10924	0.0918052	0.224176	1	162	4.25426	19.0835	7.20202e-13	8.40235e-12	7.56212e-11	162	3.17753	9.04758	2.91967e-08	1.39348e-07	3.06565e-06	110	4.09952	17.1427	5.07094e-12	5.9161e-11	5.32449e-10	110	3.0228	8.12743	1.38564e-07	5.81968e-07	1.45492e-05	162	-0.154734	-1.11322	0.76712	0.903299	1
Ambiguous_taxa, HG917679.1.1385	191	-9.86258	-930.963	7.1175e-06	4.98225e-05	0.000747338	191	-10.8813	-1886.25	7.77002e-08	3.26341e-07	8.15852e-06	0	-1.01872	-2.02613	0.703754	0.757372	1	191	-10.871	-1872.84	9.34069e-07	3.06491e-06	9.80772e-05	0	-1.00843	-2.01172	0.721222	0.765303	1	0	0.0102965	1.00716	0.996952	0.997122	1
Ambiguous_taxa, EU434509.1.1378	114.667	-3.56328	-11.821	0.00710735	0.023321	0.746271	114.667	-5.44197	-43.4708	4.09522e-05	9.55552e-05	0.00429999	9	-1.87869	-3.67742	0.1657	0.204689	1	114.667	-4.35304	-20.4361	0.000930094	0.0019532	0.0976599	9	-0.789764	-1.72879	0.556701	0.639314	1	6.33333	1.08893	2.12716	0.418699	0.686927	1
D_6__Pseudomonas sp. CNE 23, FR749870.1.1370	98.5	-6.69036	-103.276	3.50554e-07	7.36163e-06	3.68082e-05	98.5	-2.91362	-7.53504	0.0107974	0.014535	1	31.1667	3.77674	13.706	0.00411288	0.00644556	0.431852	98.5	-5.13509	-35.1411	1.09265e-05	2.73162e-05	0.00114728	5.83333	1.55527	2.93888	0.244967	0.313678	1	31.1667	-2.22147	-4.66369	0.0577773	0.229181	1
D_6__Spumella-like flagellate JBL14, HAFU01069247.55.1411	2747.5	-3.09258	-8.5302	0.00207108	0.00763353	0.217464	2747.5	-2.80116	-6.97002	0.00523235	0.00773798	0.549397	586.5	0.291416	1.22384	0.771697	0.810282	1	2747.5	-2.50742	-5.68604	0.0124383	0.0200292	1	587.167	0.585155	1.5002	0.560161	0.639314	1	587.167	0.293739	1.22581	0.769718	0.903299	1
D_6__Aeromonas sp. PAR2A, AF427150.1.1350	39.1667	0.830993	1.77891	0.167712	0.391327	1	36.3333	-1.75074	-3.36532	0.00394189	0.00627119	0.413899	39.1667	-2.58174	-5.98659	2.07439e-05	5.73186e-05	0.00217811	36.3333	-1.35404	-2.55628	0.0259039	0.037259	1	39.1667	-2.18504	-4.54739	0.000318774	0.000816372	0.0334712	25.5	0.396698	1.31649	0.516828	0.79659	1
D_6__uncultured bacterium, GQ231374.1.1331	16.3333	-2.8469	-7.19453	0.000172135	0.000860676	0.0180742	102.667	1.62447	3.08329	0.00740131	0.0105019	0.777137	102.667	4.47137	22.1828	1.9856e-09	1.38992e-08	2.08488e-07	84	1.73679	3.33293	0.00423884	0.00767376	0.445078	84	4.58369	23.9789	8.01809e-10	5.61266e-09	8.419e-08	102.667	0.112319	1.08096	0.849446	0.959052	1
D_6__Chryseobacterium formosense, HQ377322.1.1290	127.667	2.11473	4.33109	0.114596	0.273467	1	58.1667	0.0346785	1.02433	0.979364	0.993425	1	127.667	-2.08005	-4.22823	0.119873	0.151647	1	121.5	1.63859	3.11362	0.221182	0.249209	1	127.667	-0.476136	-1.39101	0.721571	0.765303	1	121.5	1.60392	3.03967	0.230117	0.523124	1
D_6__Aeromonas sp. SAL-12, HG763856.1.1279	113.833	0.251068	1.19009	0.580405	0.834829	1	288.333	0.385044	1.3059	0.392681	0.429495	1	288.333	0.133976	1.09731	0.766781	0.810282	1	208	0.330261	1.25724	0.464045	0.482423	1	208	0.0791933	1.05643	0.861011	0.89511	1	288.333	-0.0547823	-1.0387	0.9028	0.97714	1
D_6__uncultured bacterium, KF464752.1.1266	3	-0.531083	-1.44501	0.564943	0.834829	1	43.1667	2.64367	6.24919	0.00095307	0.0018195	0.100072	43.1667	3.17475	9.03016	0.000250541	0.000548058	0.0263068	154	5.1252	34.9012	1.21752e-10	9.13139e-10	1.27839e-08	154	5.65629	50.4327	5.70203e-11	4.98927e-10	5.98713e-09	154	2.48153	5.58491	0.000684837	0.00798976	0.0719079
D_6__uncultured bacterium, KF697428.1.1227	20.6667	1.34564	2.54143	0.0517992	0.139459	1	95.5	2.50039	5.65839	0.000212962	0.000456348	0.022361	95.5	1.15475	2.22646	0.081602	0.108458	1	42.5	1.79786	3.47704	0.00805346	0.0136389	0.845613	42.5	0.452221	1.36814	0.497405	0.593495	1	95.5	-0.702533	-1.62736	0.279084	0.576877	1
D_2__Gammaproteobacteria, OTU-001	79.6667	0.312449	1.24181	0.637561	0.847391	1	79.6667	-2.06941	-4.19716	0.00186328	0.00310547	0.195645	59.6667	-2.38186	-5.21209	0.000348207	0.000731235	0.0365618	79.6667	-1.48119	-2.7918	0.0258503	0.037259	1	59.6667	-1.79364	-3.46689	0.00703485	0.013937	0.73866	49.8333	0.588218	1.50339	0.378142	0.650901	1
Ambiguous_taxa, OTU-002	393.833	2.04419	4.12443	0.00650247	0.0220245	0.682759	739.833	1.86604	3.64529	0.0129023	0.0169343	1	739.833	-0.17816	-1.13144	0.811946	0.844102	1	3993.83	4.71462	26.2568	3.29036e-10	2.1593e-09	3.45488e-08	3993.83	2.67043	6.36617	0.000360506	0.000901264	0.0378531	3993.83	2.84859	7.20294	0.000139524	0.00244166	0.01465
D_6__uncultured bacterium, OTU-004	1.16667	-3.29775	-9.83383	0.0852227	0.213057	1	622.833	7.8393	229.016	0	0	0	622.833	11.1371	2252.1	1.75029e-09	1.34451e-08	1.8378e-07	987.5	8.98591	507.025	0	0	0	987.5	12.2837	4985.99	3.15047e-11	3.00727e-10	3.30799e-09	987.5	1.14661	2.21393	0.0541799	0.229181	1
Ambiguous_taxa, OTU-005	0.333333	-0.338276	-1.26424	0.816109	0.962825	1	128.167	7.2077	147.821	8.88178e-15	1.41553e-13	9.32587e-13	128.167	7.54598	186.881	9.68491e-11	9.24469e-10	1.01692e-08	43	6.0092	64.4096	1.16512e-10	9.13139e-10	1.22338e-08	43	6.34748	81.4295	5.56284e-08	2.78142e-07	5.84098e-06	128.167	-1.1985	-2.29501	0.000368588	0.00552882	0.0387017
D_5__Pseudomonas, OTU-006	7.66667	0.349484	1.27411	0.602116	0.83906	1	95	2.7634	6.78993	1.03593e-05	2.47211e-05	0.00108773	95	2.41391	5.32918	0.000139925	0.000326491	0.0146921	34.8333	1.65408	3.14723	0.00889972	0.0146011	0.93447	34.8333	1.3046	2.47015	0.0413247	0.0647626	1	95	-1.10931	-2.15743	0.0616149	0.231056	1
D_6__gamma proteobacterium HdN1, OTU-008	0	0.21694	1.16227	0.934113	0.98385	1	244	9.87129	936.6	4.11398e-07	1.27049e-06	4.31968e-05	244	9.65435	805.839	2.41328e-06	8.44646e-06	0.000253394	99.1667	9.3376	646.991	1.67693e-06	5.03079e-06	0.000176078	99.1667	9.12066	556.663	8.43358e-06	2.76727e-05	0.000885526	244	-0.533688	-1.44762	0.612124	0.860176	1
Ambiguous_taxa, OTU-009	485.667	7.75909	216.63	4.78243e-07	8.36924e-06	5.02155e-05	38.3333	3.15051	8.87972	0.0412753	0.0509872	1	485.667	-4.60858	-24.3961	0.00189151	0.00331014	0.198609	32.5	3.73924	13.3544	0.0154133	0.0241552	1	485.667	-4.01985	-16.2216	0.00672055	0.0138364	0.705658	38.3333	0.588729	1.50392	0.691961	0.896986	1
Ambiguous_taxa, OTU-010	489	-11.2339	-2408.44	2.76896e-07	7.26851e-06	2.9074e-05	489	-12.2607	-4907.18	1.2546e-09	8.2333e-09	1.31733e-07	0	-1.0268	-2.03749	0.700628	0.757372	1	489	-12.251	-4874.29	2.98519e-08	1.25378e-07	3.13445e-06	0	-1.01709	-2.02383	0.718182	0.765303	1	0	0.00970418	1.00675	0.997122	0.997122	1
D_5__uncultured, OTU-011	0	0.200498	1.14909	0.937	0.98385	1	158.333	9.37049	661.909	2.76466e-07	1.001e-06	2.90289e-05	158.333	9.16999	576.026	2.02985e-06	7.34946e-06	0.000213134	246.833	10.4878	1435.95	8.80718e-09	4.40359e-08	9.24754e-07	246.833	10.2873	1249.64	9.8322e-08	4.30159e-07	1.03238e-05	246.833	1.1173	2.16941	0.154549	0.427044	1
D_6__gamma proteobacterium HdN1, OTU-025	0	0.217555	1.16276	0.935045	0.98385	1	272.5	10.0327	1047.44	5.65737e-07	1.69721e-06	5.94023e-05	272.5	9.8151	900.825	3.06697e-06	1.03881e-05	0.000322031	96.8333	9.30937	634.455	3.46849e-06	9.42076e-06	0.000364192	96.8333	9.09182	545.645	1.54911e-05	4.78401e-05	0.00162656	272.5	-0.723284	-1.65094	0.529344	0.79659	1
D_6__metagenome, OTU-041	69.3333	0.764854	1.6992	0.327424	0.648669	1	46.5	-2.73413	-6.65357	0.000576798	0.00114271	0.0605638	69.3333	-3.49898	-11.3057	1.04589e-05	3.13767e-05	0.00109819	46.5	-1.22827	-2.34287	0.117417	0.14171	1	69.3333	-1.99313	-3.98099	0.0110223	0.0203042	1	26	1.50585	2.83993	0.0589322	0.229181	1
D_5__Aeromonas, OTU-042	133.333	0.989881	1.98602	0.475671	0.805945	1	130.5	-7.80284	-223.3	9.40692e-08	3.79895e-07	9.87727e-06	133.333	-8.79272	-443.478	1.79269e-09	1.34451e-08	1.88232e-07	130.5	-6.65204	-100.569	3.49914e-06	9.42076e-06	0.00036741	133.333	-7.64192	-199.732	9.82272e-08	4.30159e-07	1.03139e-05	2.66667	1.1508	2.22037	0.444638	0.707379	1
D_2__Gammaproteobacteria, OTU-053	103.167	0.81112	1.75457	0.5738	0.834829	1	103.167	-7.75891	-216.604	3.97742e-07	1.26554e-06	4.17629e-05	98.6667	-8.57003	-380.047	2.13929e-08	1.18224e-07	2.24625e-06	103.167	-5.79129	-55.3798	8.46363e-05	0.000201973	0.00888681	98.6667	-6.60241	-97.1679	7.40591e-06	2.59207e-05	0.00077762	3.5	1.96763	3.91124	0.207115	0.508037	1
D_6__uncultured Bacteroidetes bacterium, OTU-054	16.1667	7.03489	131.133	0.000522189	0.00249227	0.0548298	2.66667	3.46748	11.0616	0.0907308	0.108258	1	16.1667	-3.5674	-11.8548	0.00400556	0.00637247	0.420583	113	9.03805	525.682	7.65044e-06	1.95926e-05	0.000803296	113	2.00316	4.00877	0.0921068	0.128949	1	113	5.57056	47.5233	5.56785e-06	0.000255009	0.000584624
D_4__Burkholderiaceae, OTU-136	7.16667	1.10423	2.14985	0.0321537	0.0937816	1	119.833	3.94526	15.4043	0	0	0	119.833	2.84102	7.16528	2.85961e-11	3.75324e-10	3.00259e-09	39.1667	2.68498	6.43074	8.11748e-09	4.26168e-08	8.52335e-07	39.1667	1.58075	2.99125	0.000274358	0.000738656	0.0288076	119.833	-1.26027	-2.39541	0.000562781	0.00738649	0.059092
D_2__Gammaproteobacteria, OTU-188	132	-0.198434	-1.14745	0.83001	0.968346	1	132	-3.3584	-10.256	0.00030447	0.000626849	0.0319693	90	-3.15997	-8.93809	0.000693239	0.0013734	0.0727901	132	-3.02651	-8.14835	0.0011478	0.00236312	0.120519	90	-2.82807	-7.10125	0.00242022	0.00540687	0.254123	20.6667	0.331894	1.25866	0.723459	0.900018	1
Ambiguous_taxa, OTU-207	111.667	0.884497	1.84612	0.57889	0.834829	1	111.667	-8.30424	-316.101	1.02939e-06	2.84436e-06	0.000108086	108.333	-9.18874	-583.561	6.42151e-08	2.80941e-07	6.74259e-06	111.667	-8.46833	-354.179	1.37388e-06	4.24286e-06	0.000144257	108.333	-9.35283	-653.857	9.63956e-08	4.30159e-07	1.01215e-05	0.833333	-0.164092	-1.12046	0.929339	0.985663	1
